# Supplementary material for: Expanding the Utility of Bioinformatic Data for the Full Stereostructural Assignments of Marinolides A and B, 24- and 26-Membered Macrolactones Produced by a Chemically Exceptional Marine-Derived Bacterium
Source: MDPI journal article supplement (doi:10.3390/md21060367), 2023-06-20
Supplement: s1 [file s1]

# Supporting Information

## **Expanding the Utility of Bioinformatic Data for the Full Stereostructural Assignments of Marinolides A and B, 24- and 26-Membered Macrolactones Produced by a Chemically Exceptional Marine-Derived Bacterium**

Min Cheol Kim,<sup>1</sup> Jaclyn M. Winter,<sup>2\*</sup> Reiko Cullum,<sup>1</sup> Alexander J. Smith,<sup>1</sup> William Fenical<sup>1,3,4\*</sup>

<sup>1</sup>Center for Marine Biotechnology and Biomedicine, Scripps Institution of Oceanography, University of California, San Diego, La Jolla, CA 92093, United States

<sup>2</sup>Department of Pharmacology and Toxicology, University of Utah, Salt Lake City, Utah 84112, United States

<sup>3</sup>Skaggs School of Pharmacy and Pharmaceutical Sciences, University of California, San Diego, La Jolla, CA 92093, United States

<sup>4</sup>Moore's Comprehensive Cancer Center, University of California, San Diego, La Jolla, CA 92093, United States

\*To whom correspondence may be addressed. E-mail: wfenical@ucsd.edu and jaclyn.winter@utah.edu

## Table of Contents

### Supplementary Tables

|                                                                                                                                                |     |
|------------------------------------------------------------------------------------------------------------------------------------------------|-----|
| <b>Table S1.</b> NMR spectroscopic data for marinolides A ( <b>1</b> ) and B ( <b>2</b> )                                                      | S35 |
| <b>Table S2.</b> 2D COSY and/or TOCSY, HMBC, and HSQC-TOCSY NMR data for marinolide A ( <b>1</b> )                                             | S37 |
| <b>Table S3.</b> Tabulated 2D ROESY data for marinolide A ( <b>1</b> )                                                                         | S39 |
| <b>Table S4.</b> Annotation of the <i>mld</i> biosynthetic cluster from Actinomycete AJS-327                                                   | S40 |
| <b>Table S5.</b> Crystal data and structure refinement for <b>1a</b>                                                                           | S45 |
| <b>Table S6.</b> Atomic coordinates (x 104) and equivalent isotropic displacement parameters (Å <sup>2</sup> x 10 <sup>3</sup> ) for <b>1a</b> | S46 |
| <b>Table S7.</b> Bond lengths [Å] and angles [°] for <b>1a</b>                                                                                 | S51 |
| <b>Table S8.</b> Anisotropic displacement parameters (Å <sup>2</sup> x 10 <sup>3</sup> ) for <b>1a</b>                                         | S68 |
| <b>Table S9.</b> Hydrogen coordinates (x 104) and isotropic displacement parameters (Å <sup>2</sup> x 10 <sup>3</sup> ) for <b>1a</b>          | S73 |

### Supplemental Figures [NMR spectra recorded at 500 MHz (<sup>1</sup>H) and 125 MHz (<sup>13</sup>C)]

|                                                                                                                     |     |
|---------------------------------------------------------------------------------------------------------------------|-----|
| <b>Figure S1.</b> <sup>1</sup> H NMR spectrum of marinolide A ( <b>1</b> ) in benzene- <i>d</i> <sub>6</sub>        | S3  |
| <b>Figure S2.</b> <sup>13</sup> C NMR spectrum of marinolide A ( <b>1</b> ) in benzene- <i>d</i> <sub>6</sub>       | S4  |
| <b>Figure S3.</b> COSY NMR spectrum of marinolide A ( <b>1</b> ) in benzene- <i>d</i> <sub>6</sub>                  | S5  |
| <b>Figure S4.</b> HSQC NMR spectrum of marinolide A ( <b>1</b> ) in benzene- <i>d</i> <sub>6</sub>                  | S6  |
| <b>Figure S5.</b> HMBC NMR spectrum of marinolide A ( <b>1</b> ) in benzene- <i>d</i> <sub>6</sub>                  | S7  |
| <b>Figure S6.</b> Extended HMBC NMR spectrum of marinolide A ( <b>1</b> ) in benzene- <i>d</i> <sub>6</sub>         | S8  |
| <b>Figure S7.</b> ROESY NMR spectrum of marinolide A ( <b>1</b> ) in benzene- <i>d</i> <sub>6</sub>                 | S9  |
| <b>Figure S8.</b> TOCSY NMR spectrum of marinolide A ( <b>1</b> ) in benzene- <i>d</i> <sub>6</sub>                 | S10 |
| <b>Figure S9.</b> HETLOC NMR spectrum of marinolide A ( <b>1</b> ) in benzene- <i>d</i> <sub>6</sub>                | S11 |
| <b>Figure S10.</b> HSQC-TOCSY NMR spectrum of marinolide A ( <b>1</b> ) in benzene- <i>d</i> <sub>6</sub>           | S12 |
| <b>Figure S11.</b> <sup>1</sup> H NMR spectrum of marinolide A ( <b>1</b> ) in CD <sub>3</sub> OD                   | S13 |
| <b>Figure S12.</b> <sup>13</sup> C NMR spectrum of marinolide A ( <b>1</b> ) in CD <sub>3</sub> OD                  | S14 |
| <b>Figure S13.</b> COSY NMR spectrum of marinolide A ( <b>1</b> ) in CD <sub>3</sub> OD                             | S15 |
| <b>Figure S14.</b> HSQC NMR spectrum of marinolide A ( <b>1</b> ) in CD <sub>3</sub> OD                             | S16 |
| <b>Figure S15.</b> HMBC NMR spectrum of marinolide A ( <b>1</b> ) in CD <sub>3</sub> OD                             | S17 |
| <b>Figure S16.</b> HR-ESI-TOFMS spectrum of marinolide A ( <b>1</b> )                                               | S18 |
| <b>Figure S17.</b> <sup>1</sup> H NMR spectrum of marinolide B ( <b>2</b> ) in benzene- <i>d</i> <sub>6</sub>       | S19 |
| <b>Figure S18.</b> <sup>13</sup> C NMR spectrum of marinolide B ( <b>2</b> ) in benzene- <i>d</i> <sub>6</sub>      | S20 |
| <b>Figure S19.</b> COSY NMR spectrum of marinolide B ( <b>2</b> ) in benzene- <i>d</i> <sub>6</sub>                 | S21 |
| <b>Figure S20.</b> HSQC NMR spectrum of marinolide B ( <b>2</b> ) in benzene- <i>d</i> <sub>6</sub>                 | S22 |
| <b>Figure S21.</b> HMBC NMR spectrum of marinolide B ( <b>2</b> ) in benzene- <i>d</i> <sub>6</sub>                 | S23 |
| <b>Figure S22.</b> ROESY NMR spectrum of marinolide B ( <b>2</b> ) in benzene- <i>d</i> <sub>6</sub>                | S24 |
| <b>Figure S23.</b> TOCSY NMR spectrum of marinolide B ( <b>2</b> ) in benzene- <i>d</i> <sub>6</sub>                | S25 |
| <b>Figure S24.</b> HETLOC NMR spectrum of marinolide B ( <b>2</b> ) in benzene- <i>d</i> <sub>6</sub>               | S26 |
| <b>Figure S25.</b> HSQC-TOCSY NMR spectrum of marinolide B ( <b>2</b> ) in benzene- <i>d</i> <sub>6</sub>           | S27 |
| <b>Figure S26.</b> HR-ESI-TOFMS spectrum of marinolide B ( <b>2</b> ).                                              | S28 |
| <b>Figure S27.</b> <sup>1</sup> H NMR spectrum of bis-acetonide ( <b>1a</b> ) in benzene- <i>d</i> <sub>6</sub> .   | S29 |
| <b>Figure S28.</b> <sup>13</sup> C NMR spectrum of bis-acetonide ( <b>1a</b> ) in benzene- <i>d</i> <sub>6</sub> .  | S30 |
| <b>Figure S29.</b> COSY NMR spectrum of bis-acetonide ( <b>1a</b> ) in benzene- <i>d</i> <sub>6</sub> .             | S31 |
| <b>Figure S30.</b> HSQC NMR spectrum of bis-acetonide ( <b>1a</b> ) in benzene- <i>d</i> <sub>6</sub> .             | S32 |
| <b>Figure S31.</b> HMBC NMR spectrum of bis-acetonide ( <b>1a</b> ) in benzene- <i>d</i> <sub>6</sub> .             | S33 |
| <b>Figure S32.</b> ROESY NMR spectrum of bis-acetonide ( <b>1a</b> ) in benzene- <i>d</i> <sub>6</sub> .            | S34 |
| <b>Figure S33.</b> <i>mld</i> biosynthetic cluster from <i>Streptomyces</i> sp. AJS-327                             | S40 |
| <b>Figure S34.</b> Sequence alignment of key acyltransferase domain residues in the <i>mld</i> polyketide synthases | S41 |
| <b>Figure S35.</b> Sequence alignment of key ketoreductase domain residues in the <i>mld</i> polyketide synthases   | S42 |
| <b>Figure S36.</b> Sequence alignment of key dehydratase domain residues in the <i>mld</i> polyketide synthases     | S43 |
| <b>Figure S37.</b> Sequence alignment of key enoyl reductase domain residues in the <i>mld</i> polyketide synthases | S43 |
| <b>Figure S38.</b> Sequence alignment of key ketosynthase domain residues in the <i>mld</i> polyketide synthases    | S44 |
| CIF File information for the bis-acetonide X-Ray structure                                                          | S80 |
| Supplemental References                                                                                             | S80 |

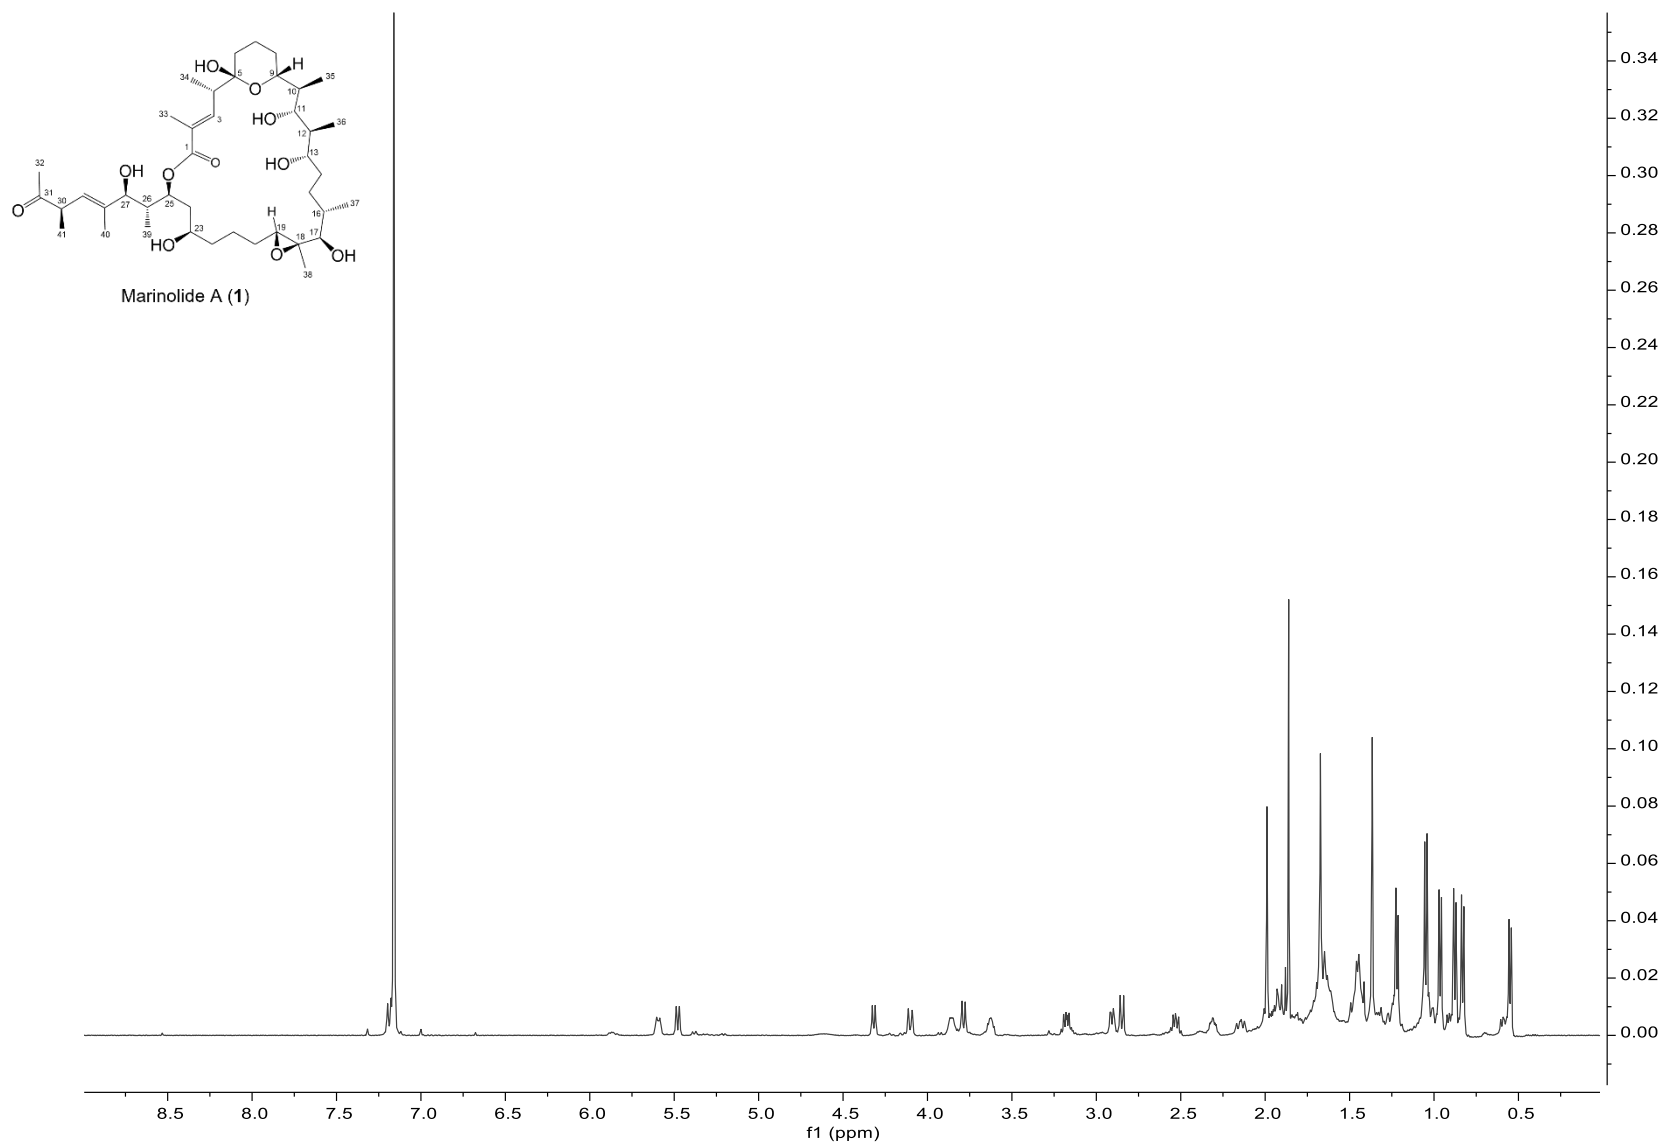

**Figure S1.**  $^1\text{H}$  NMR spectrum of marinolide A (**1**) in benzene- $d_6$ .

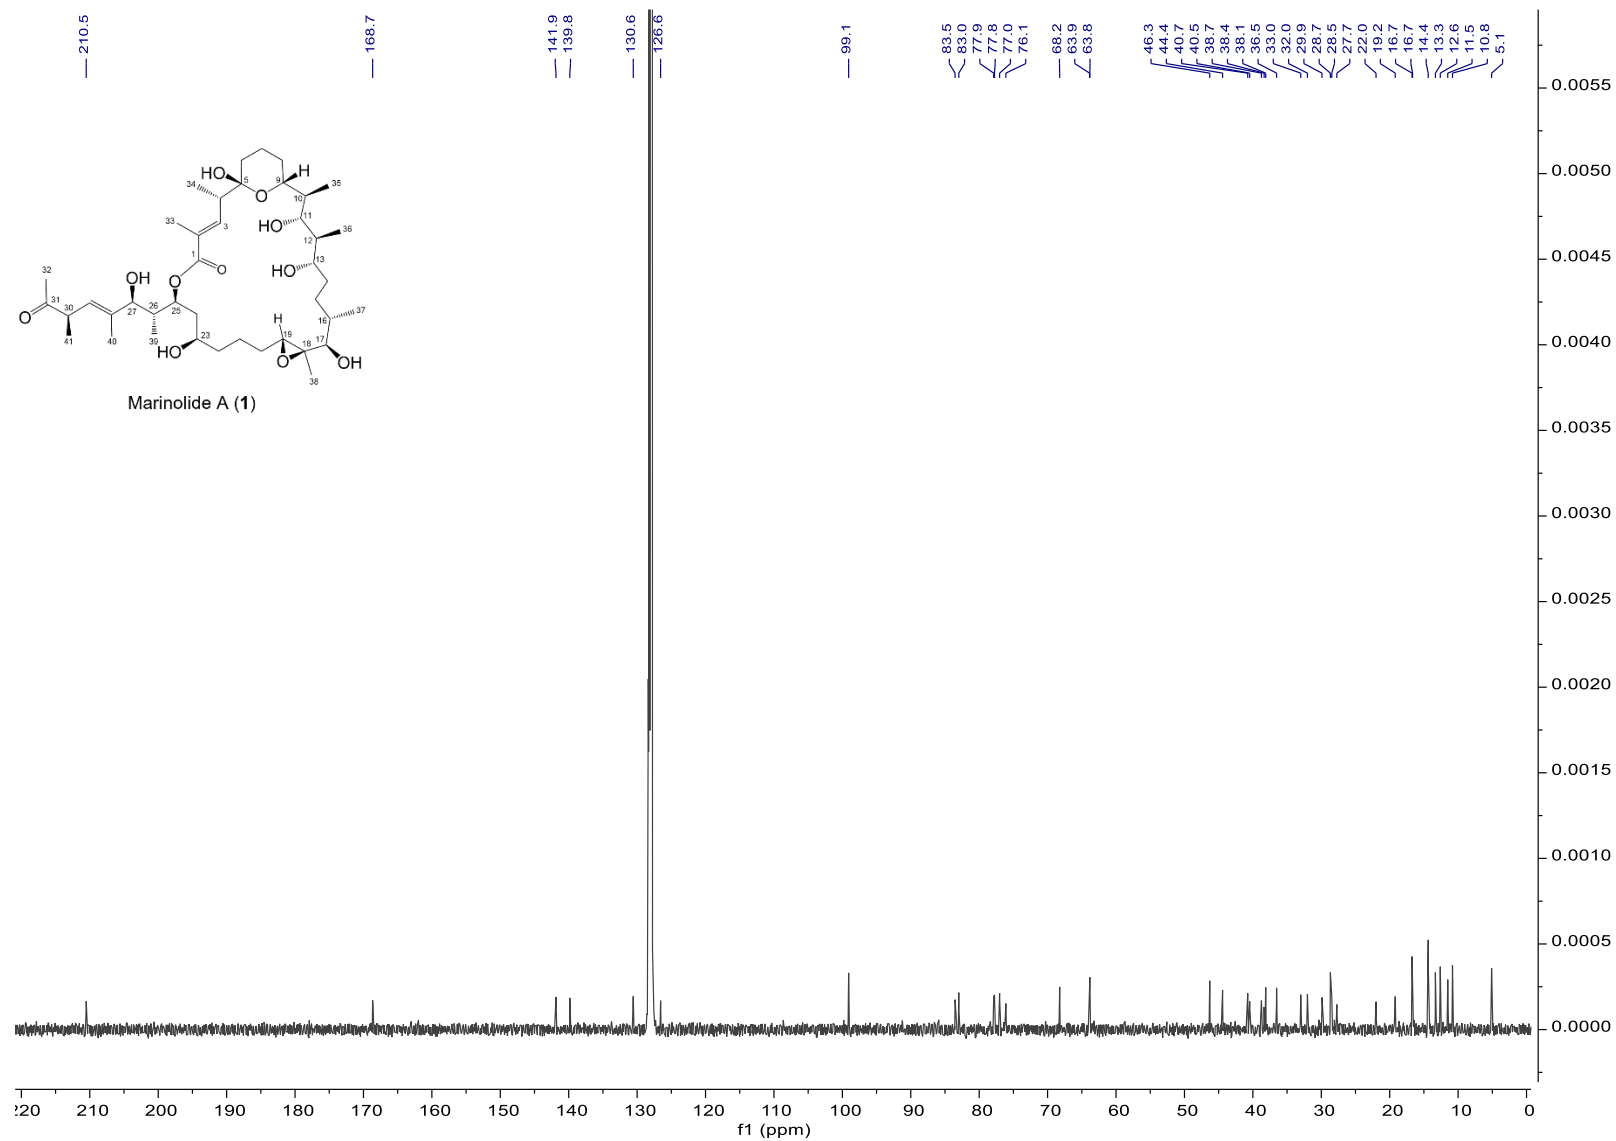

**Figure S2.**  $^{13}\text{C}$  NMR spectrum of marinolide A (1) in benzene- $d_6$ .



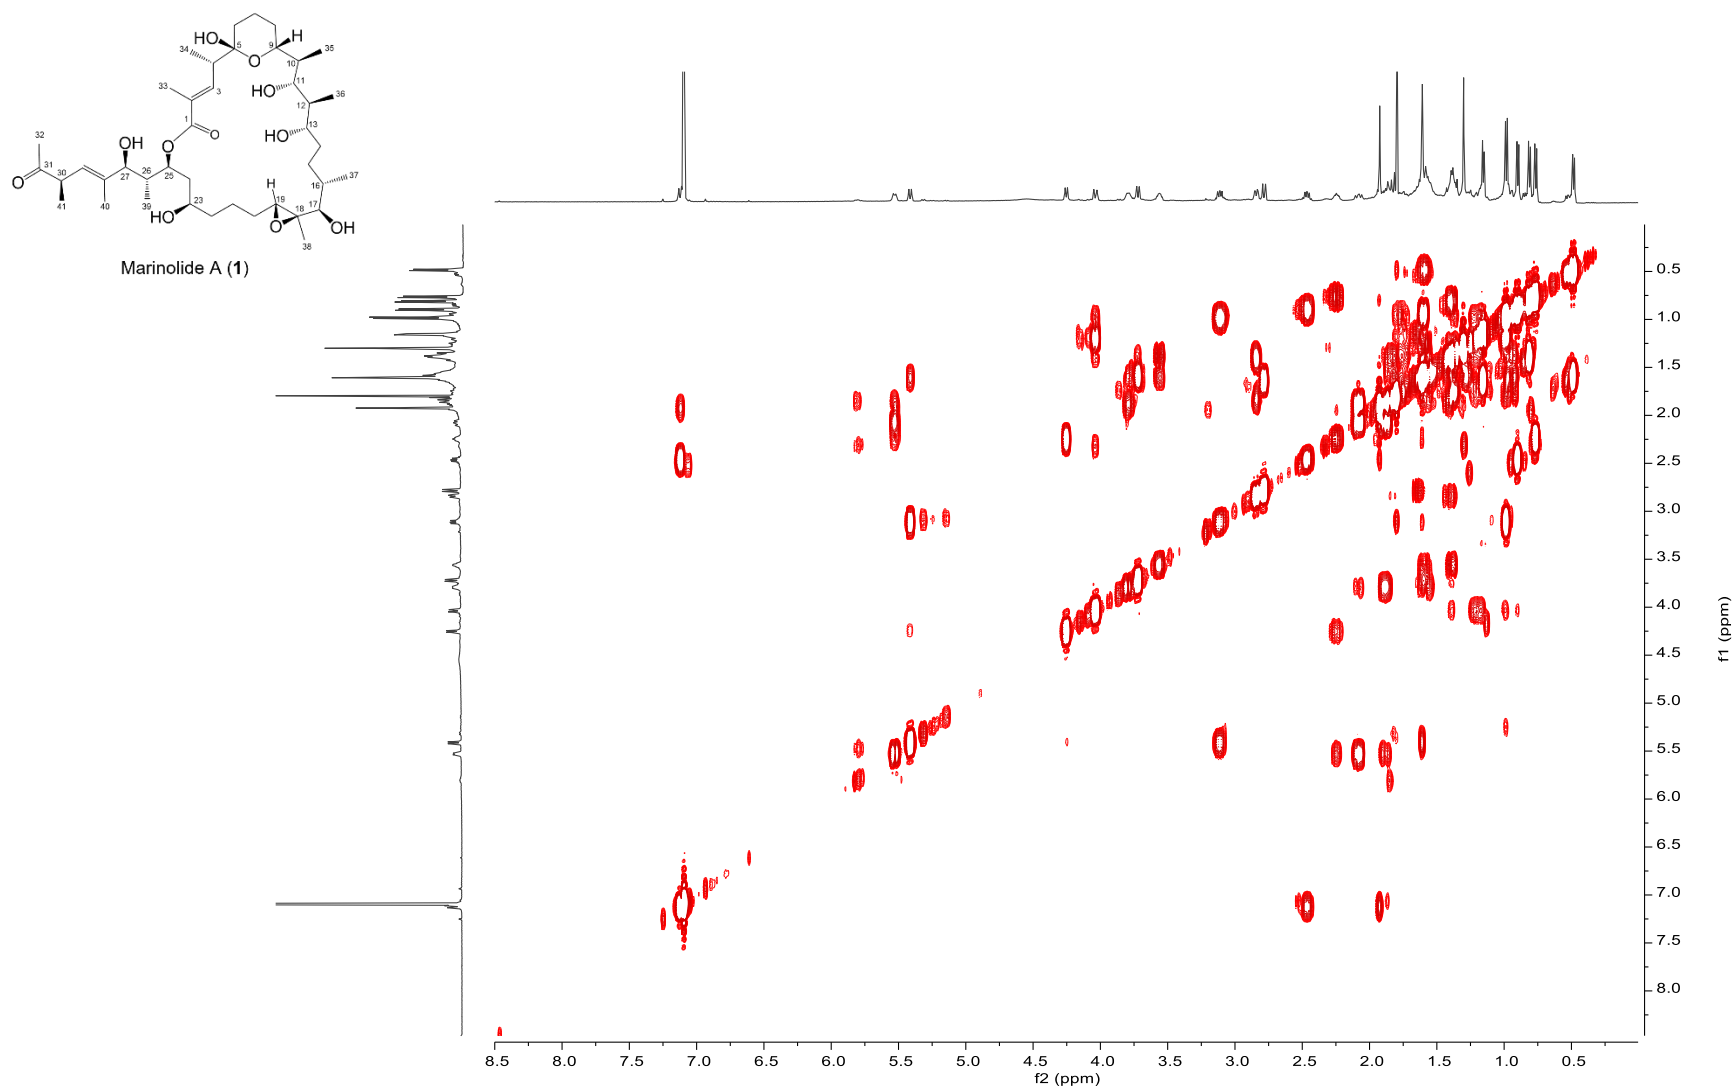

**Figure S3.** COSY NMR spectrum of marinolide A (**1**) in benzene- $d_6$ .

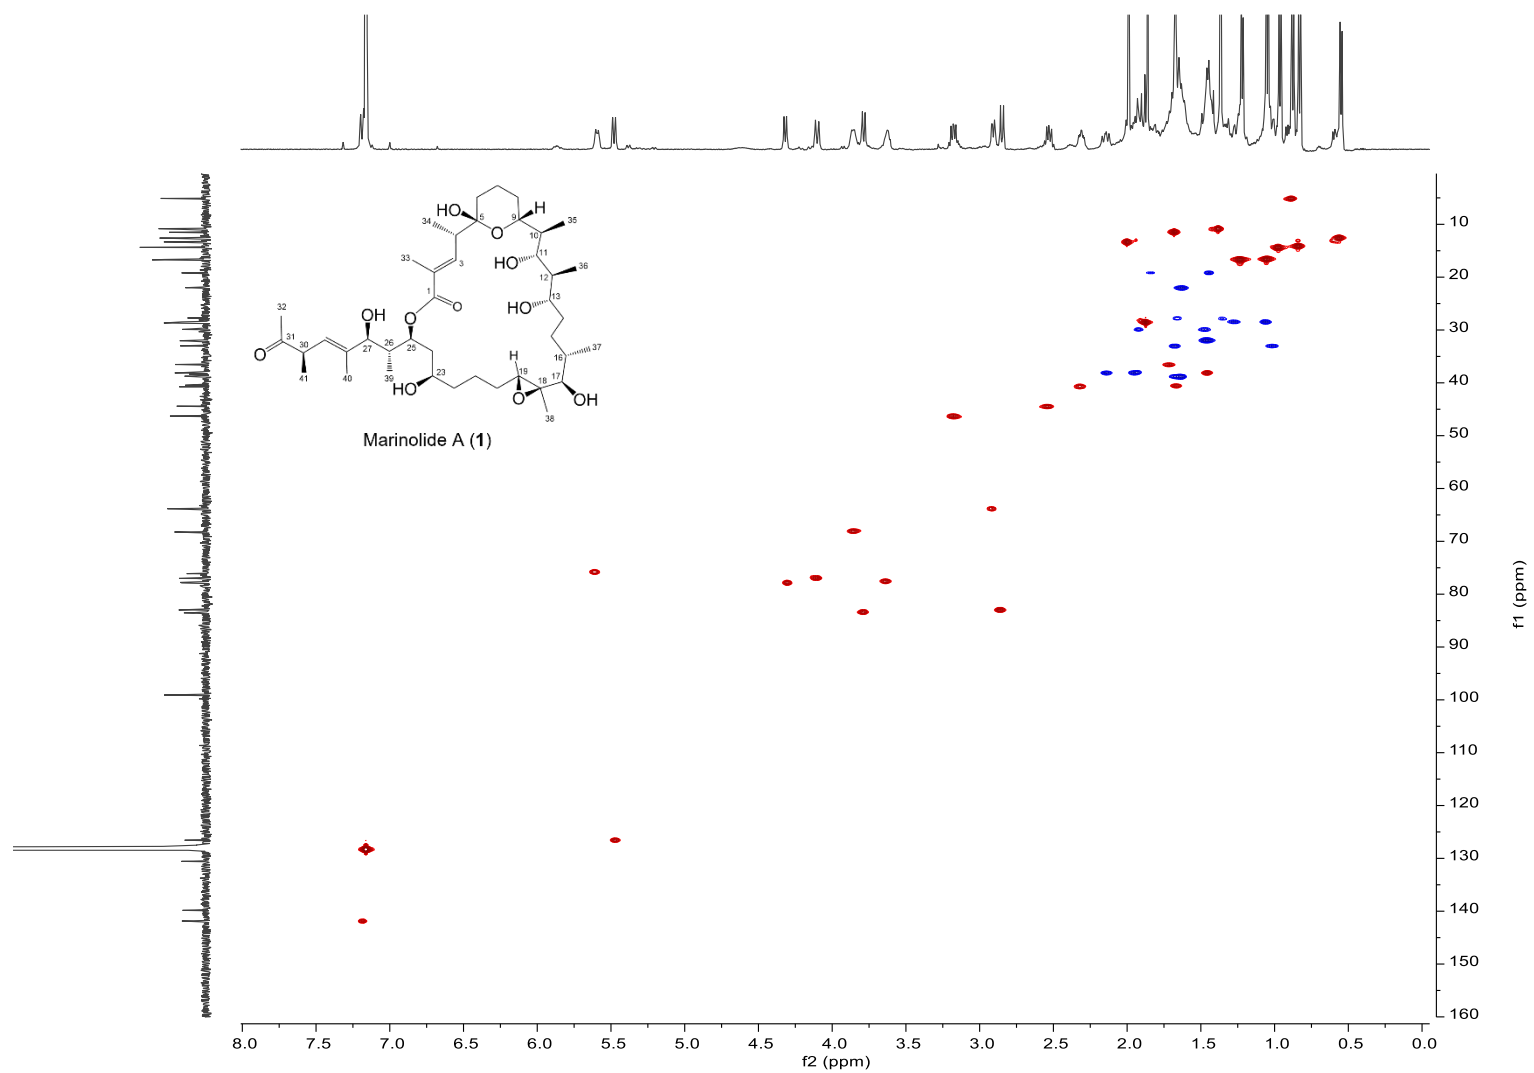

**Figure S4.** HSQC NMR spectrum of marinolide A (**1**) in benzene- $d_6$ .

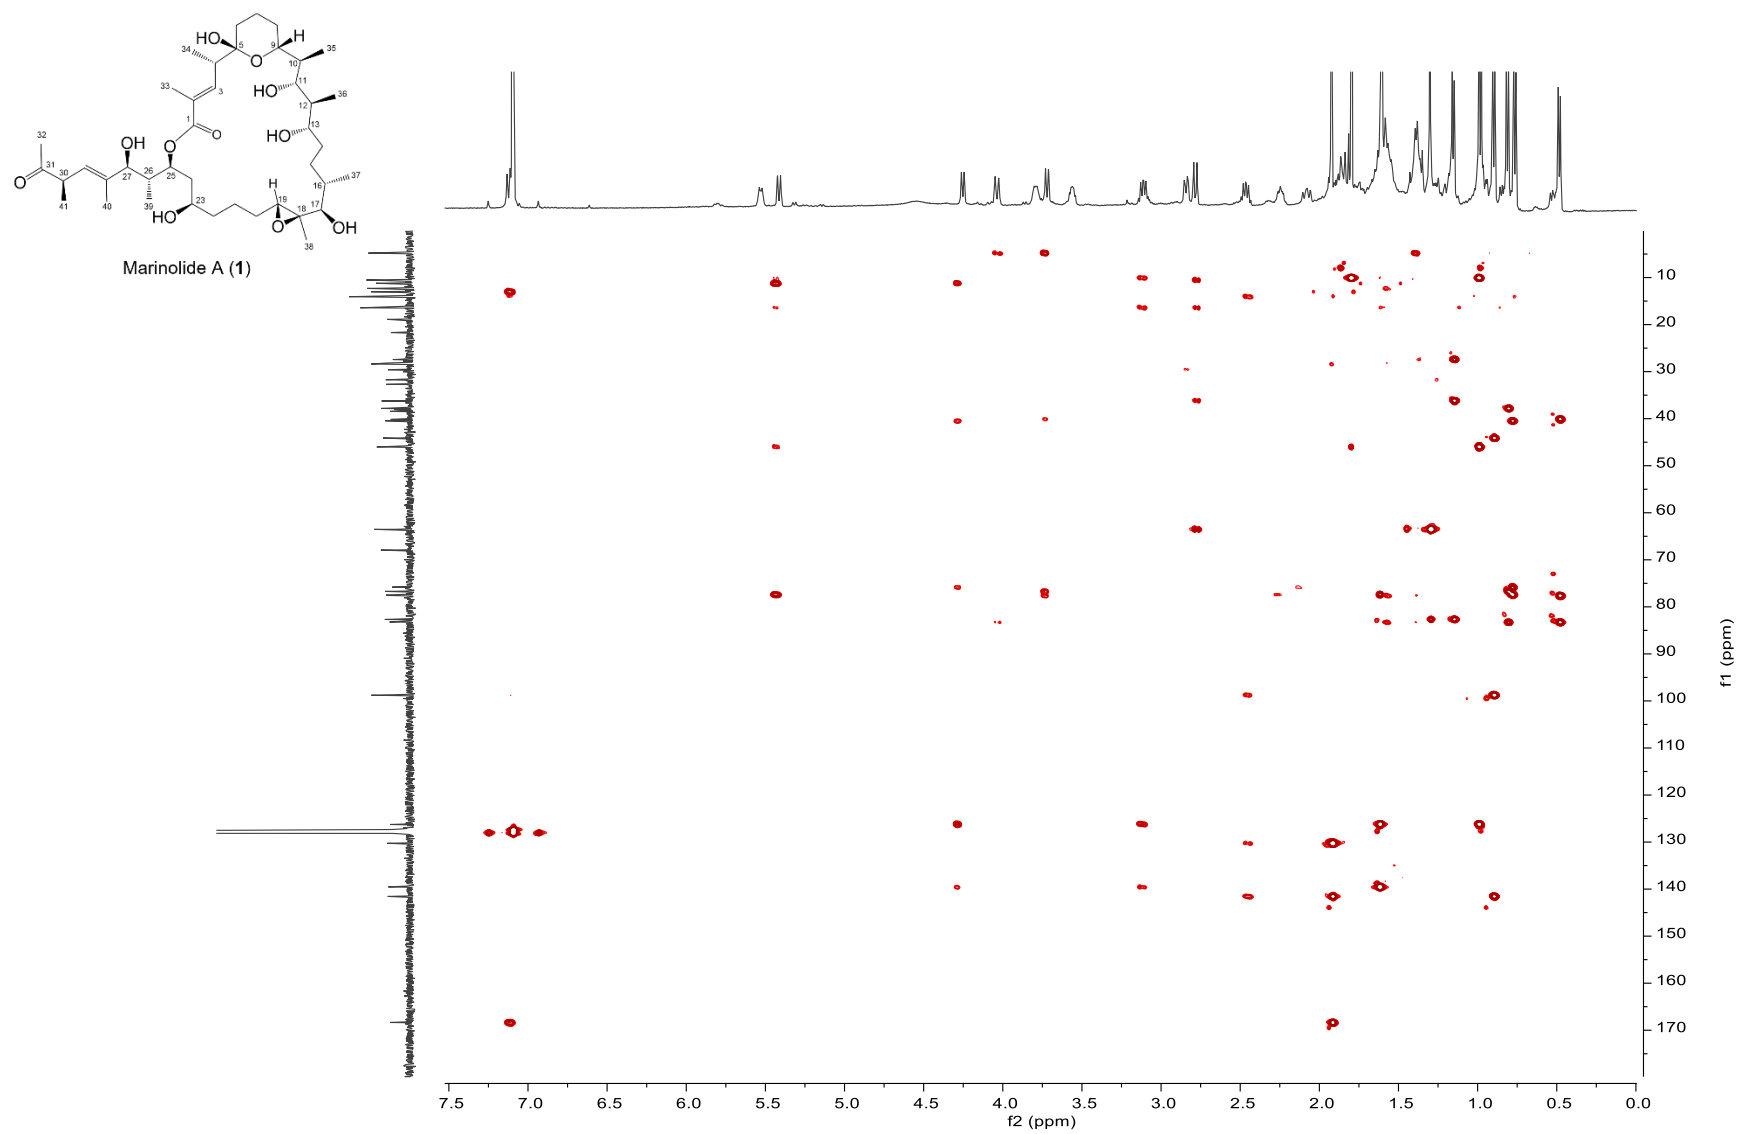

**Figure S5.** HMBC NMR spectrum of marinolide A (**1**) in benzene- $d_6$ .

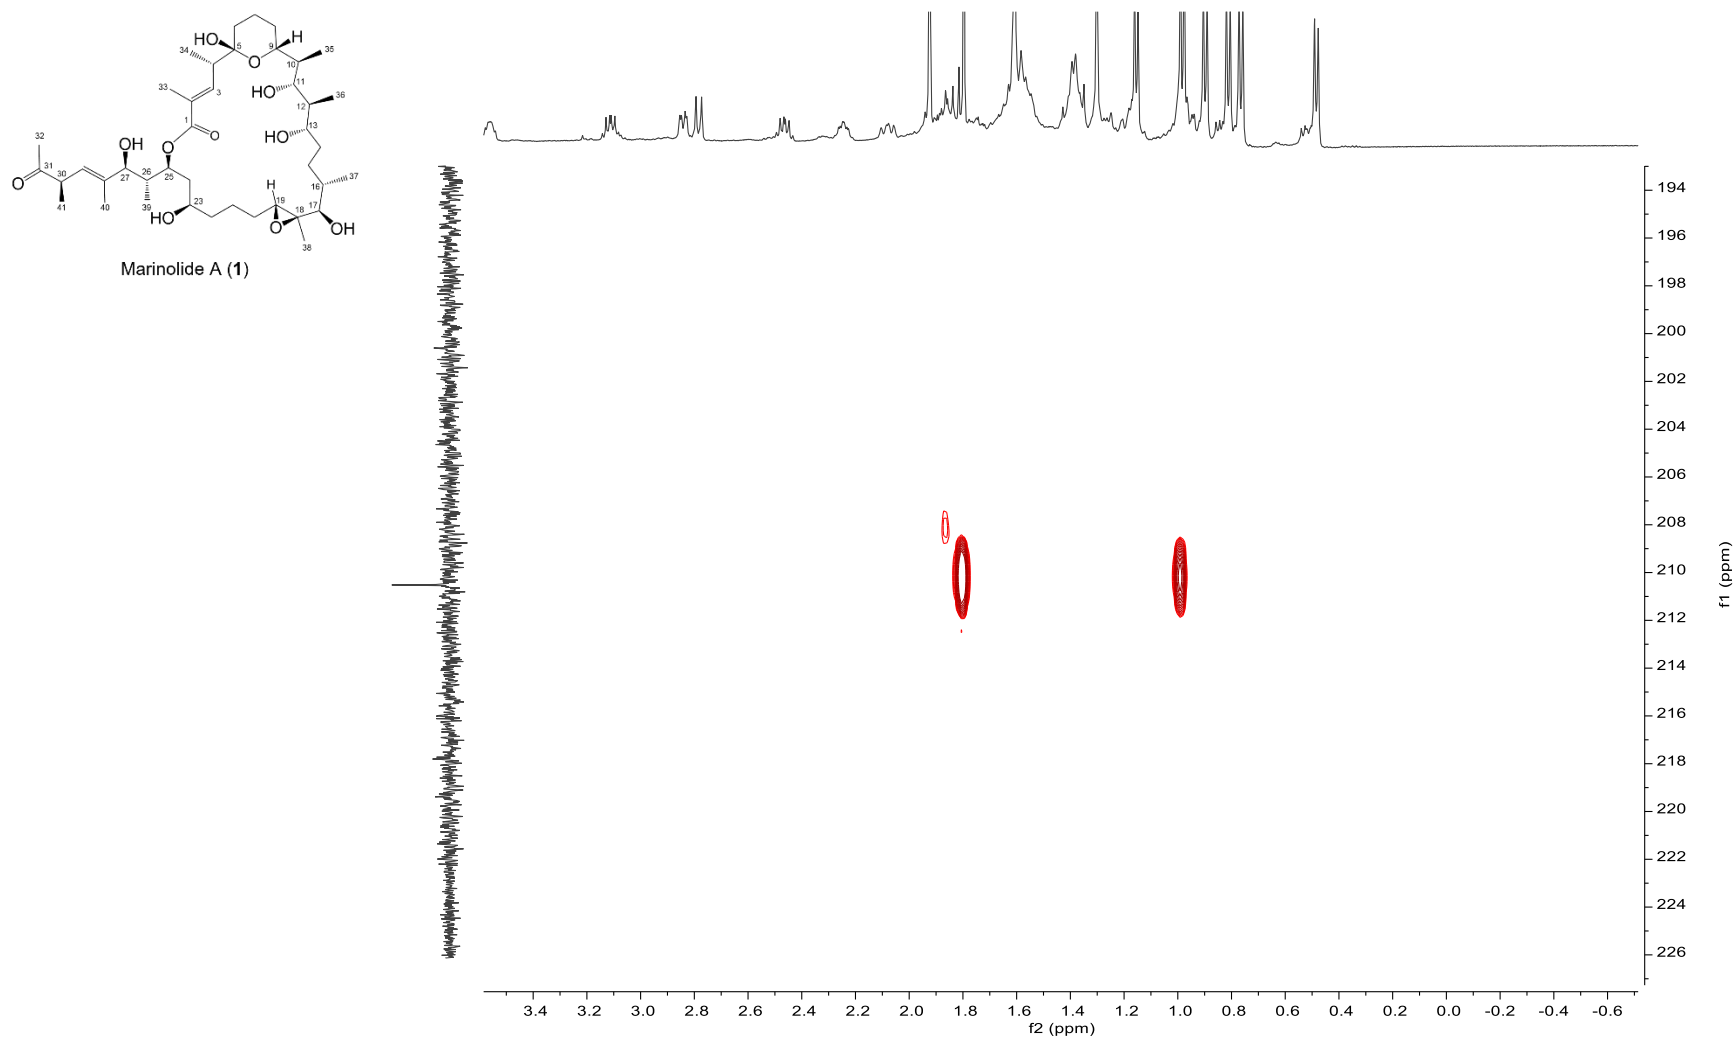

**Figure S6.** Extended HMBC NMR spectrum of marinolide A (**1**) in benzene- $d_6$ .

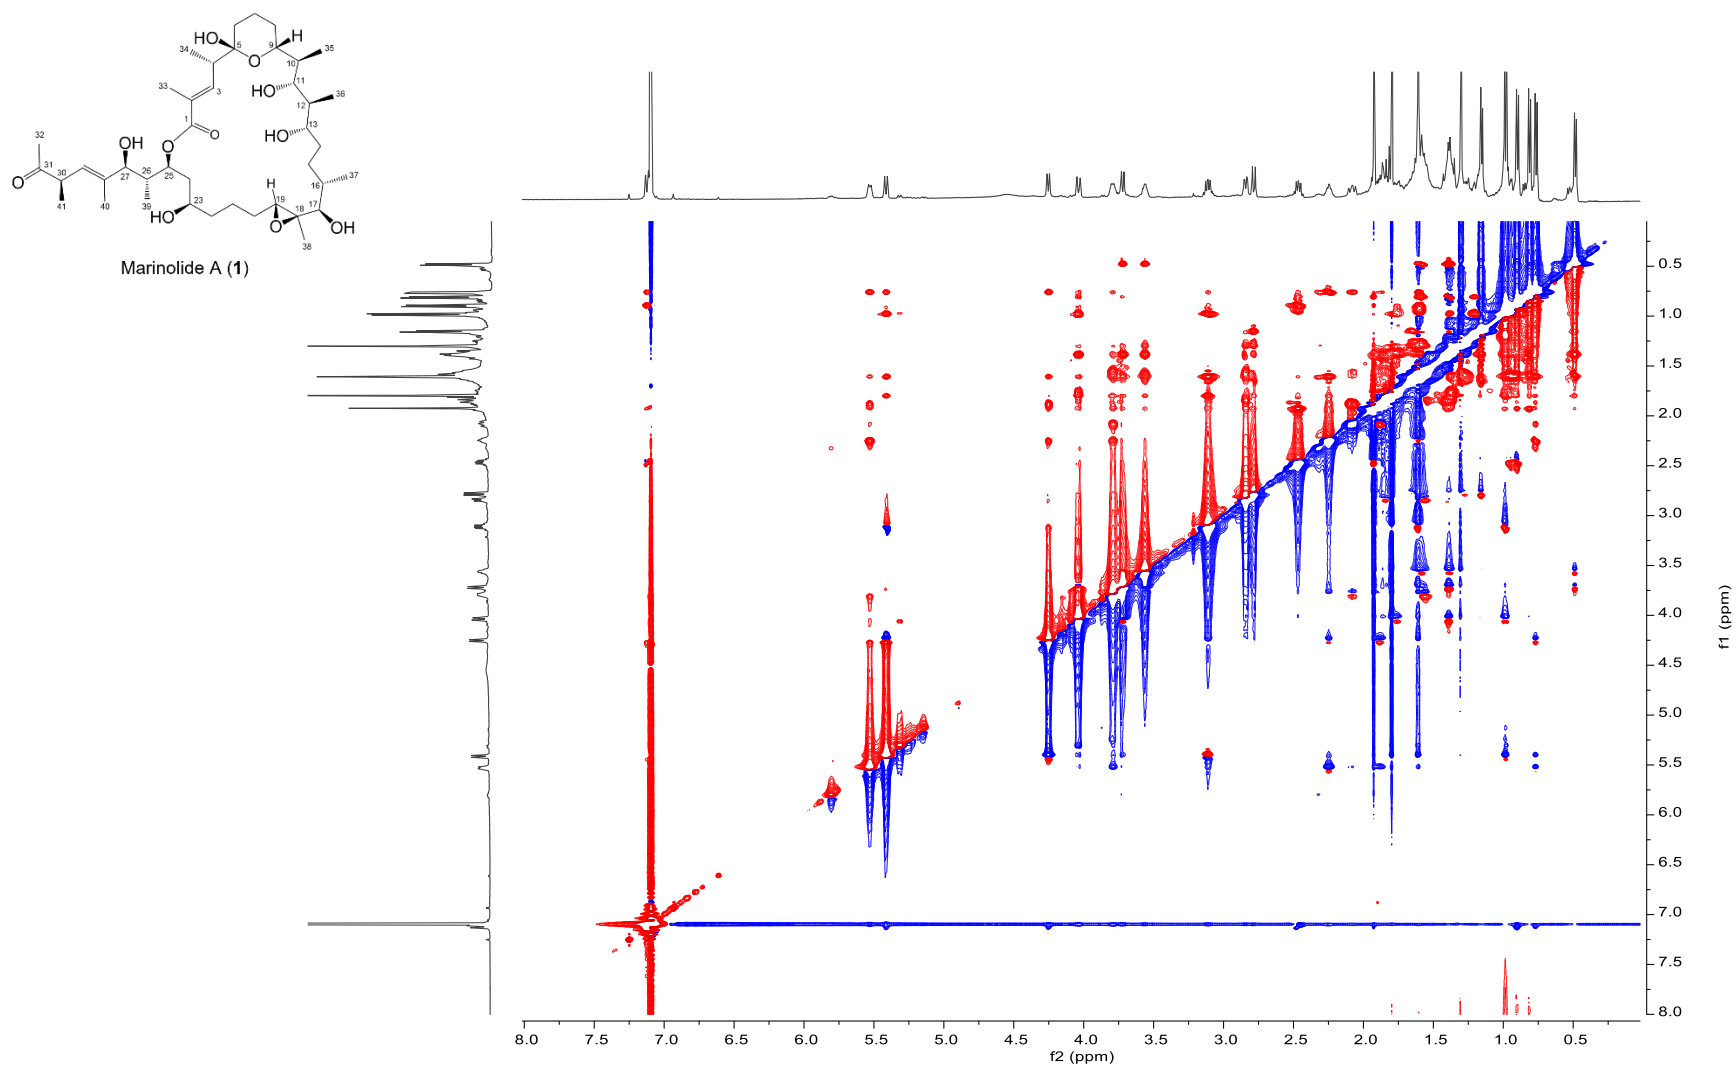

**Figure S7.** ROESY NMR spectrum of marinolide A (1) in benzene-*d*<sub>6</sub>.

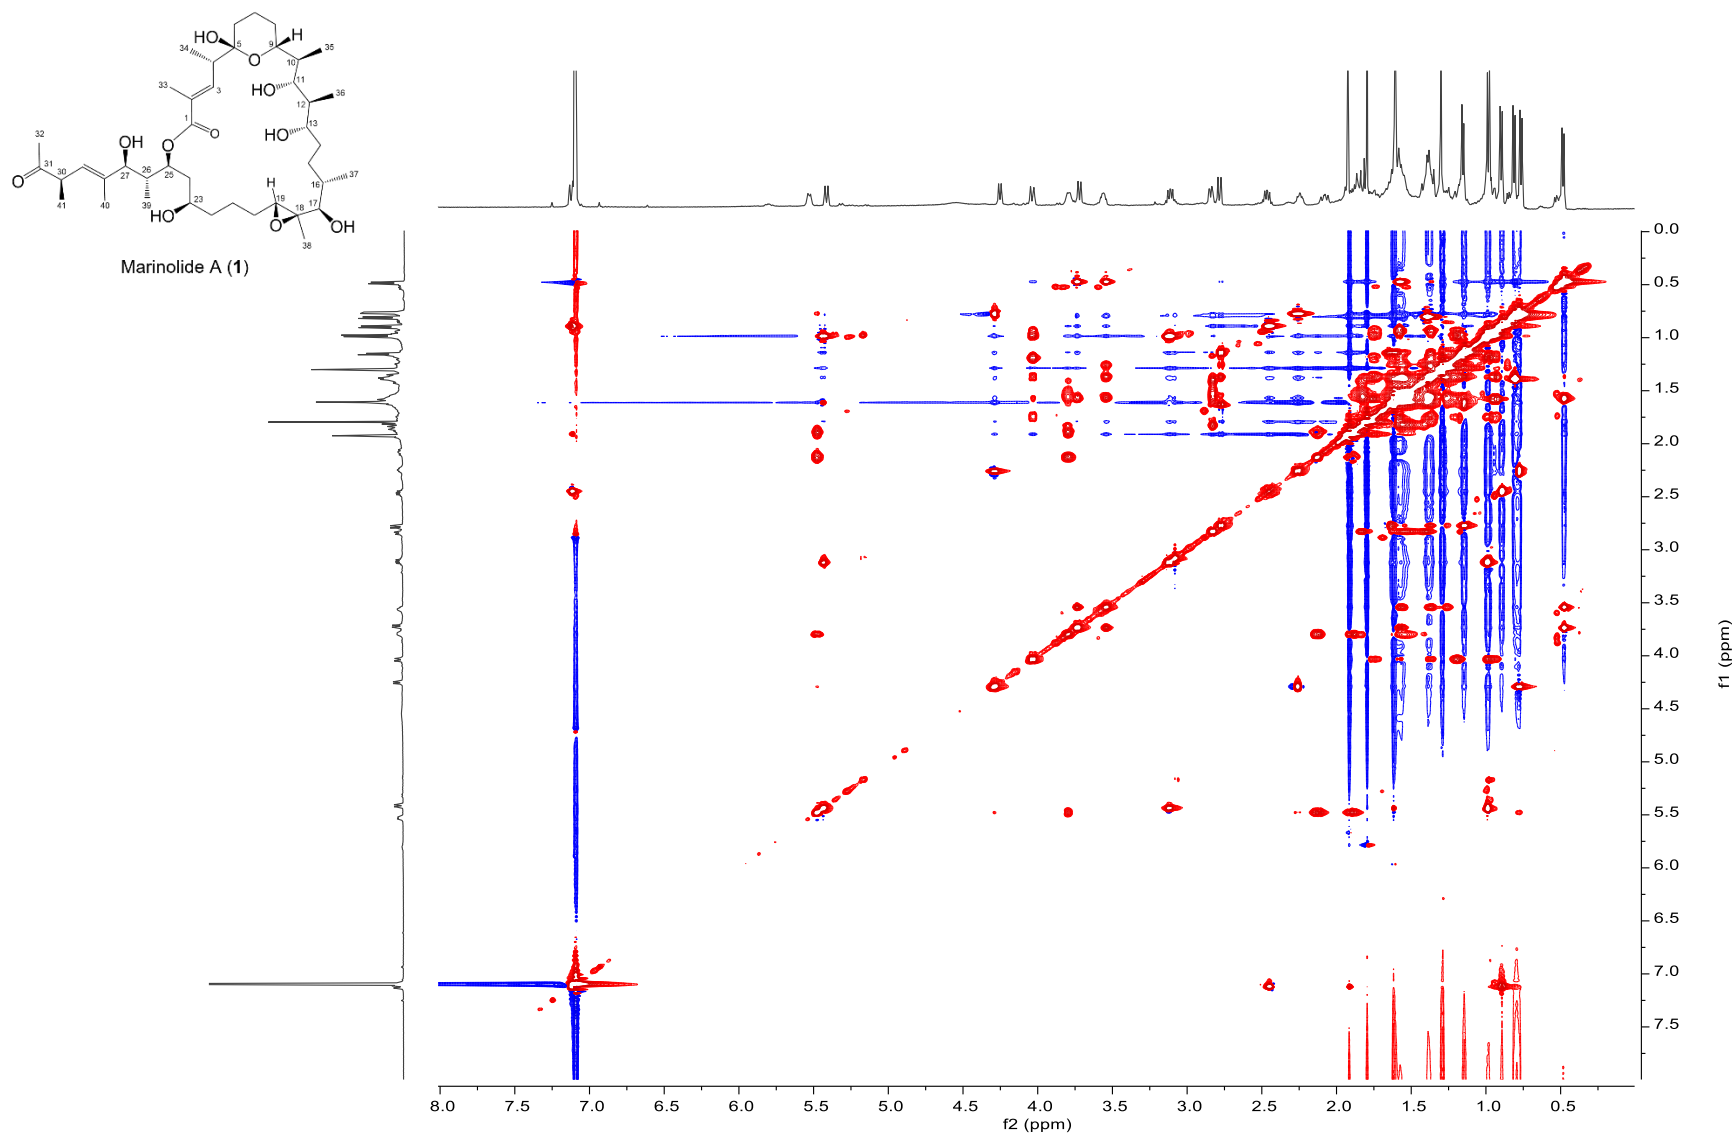

**Figure S8.** TOCSY NMR spectrum of marinolide A (**1**) in benzene- $d_6$ .

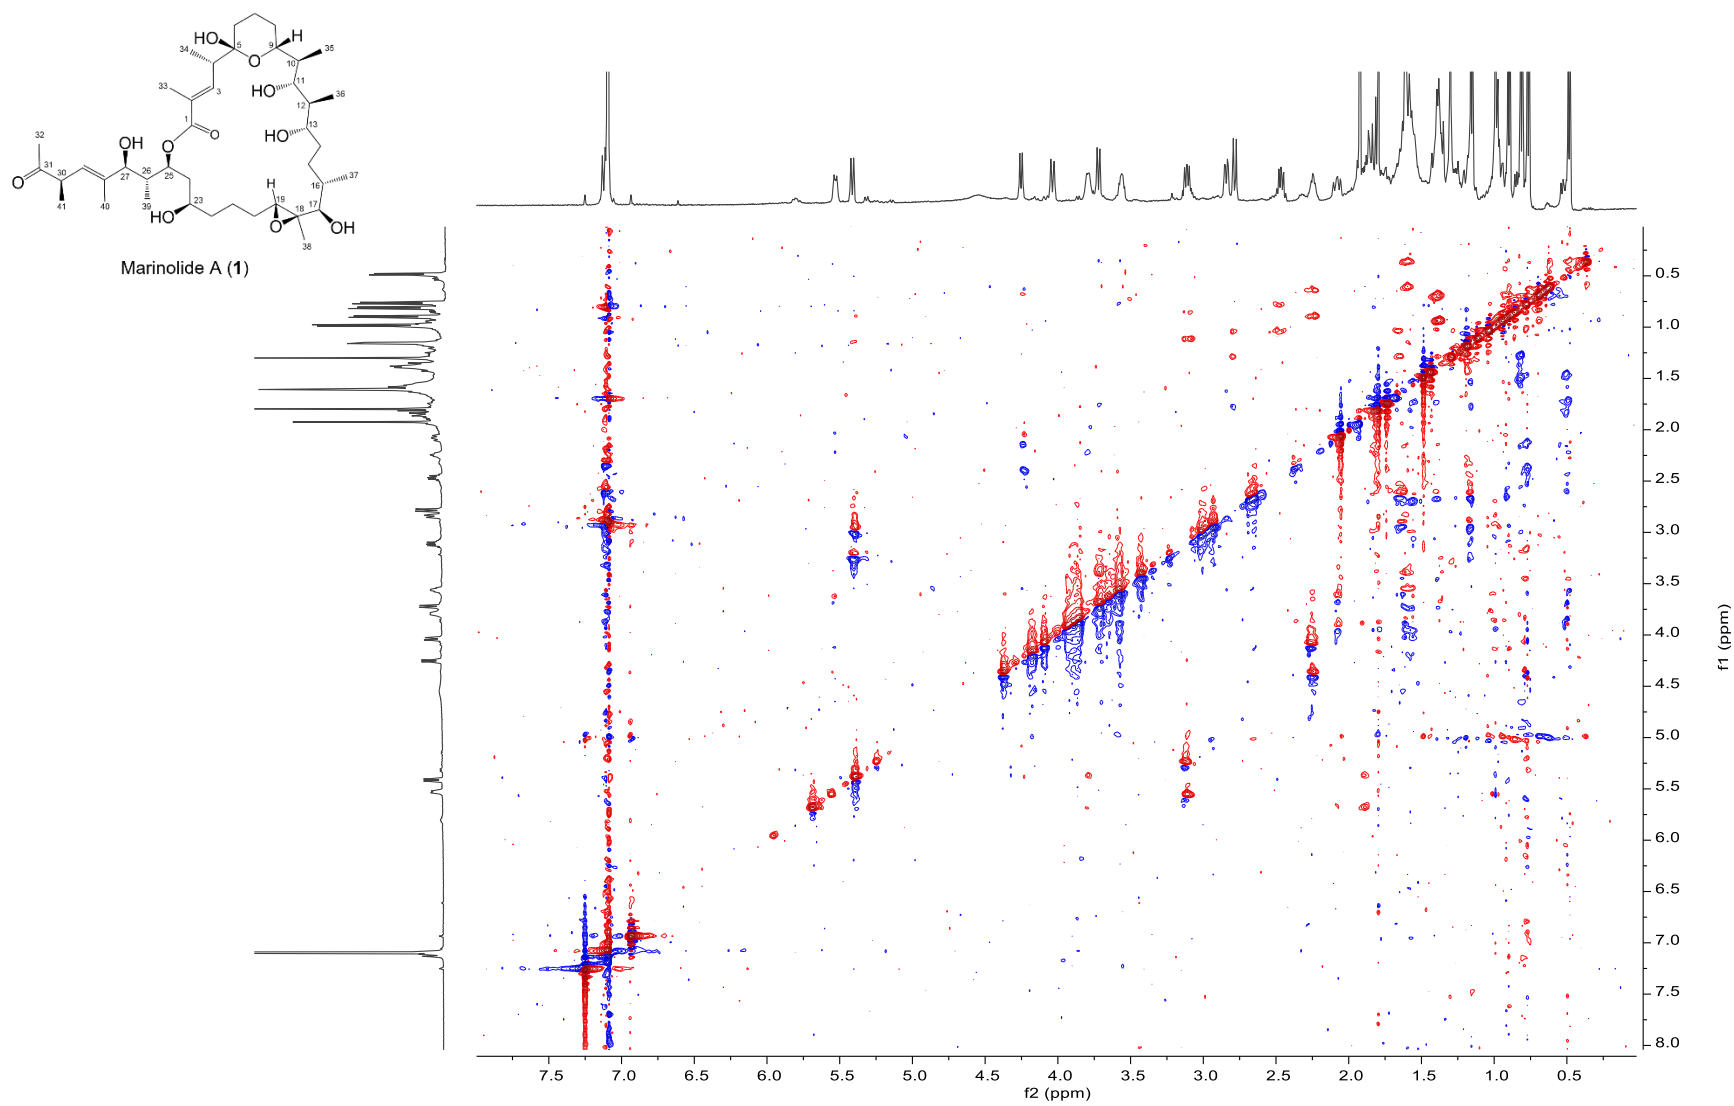

**Figure S9.** HETLOC NMR spectrum of marinolide A (**1**) in benzene- $d_6$ .

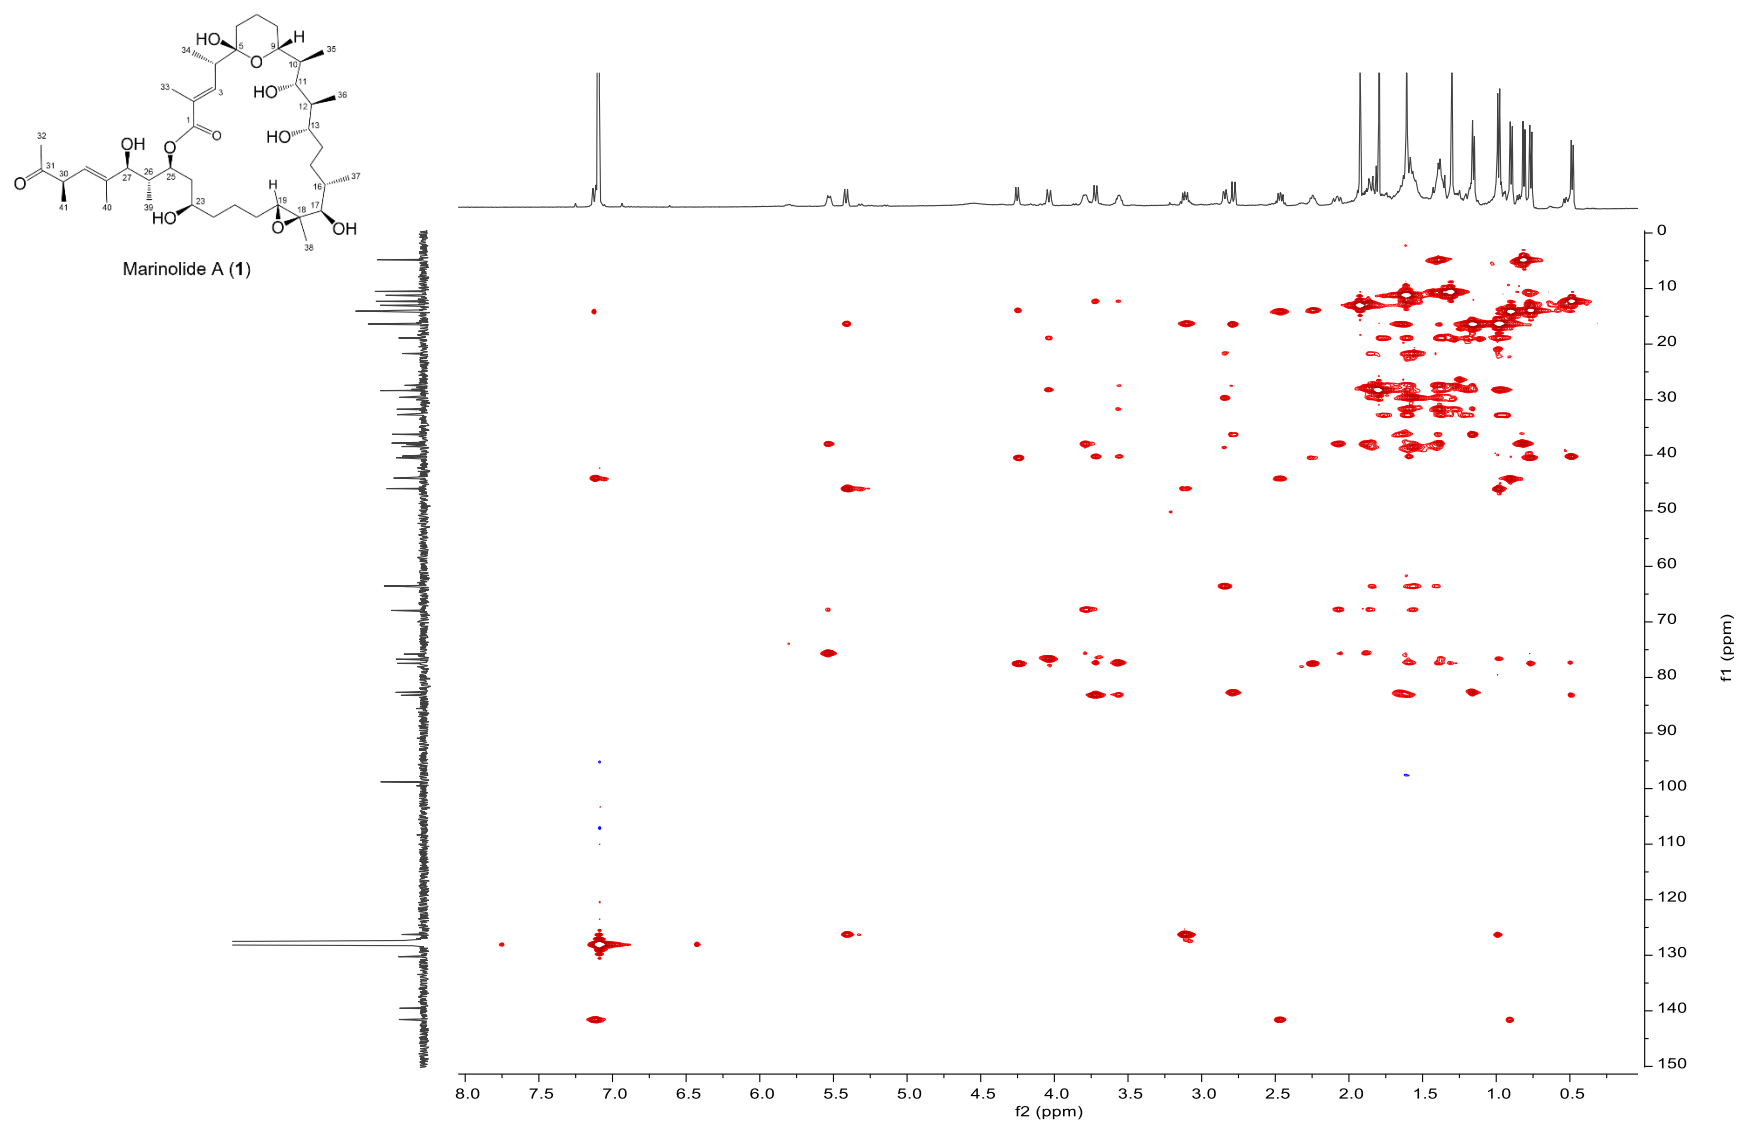

**Figure S10.** HSQC-TOCSY NMR spectrum of marinolide A (**1**) in benzene- $d_6$ .



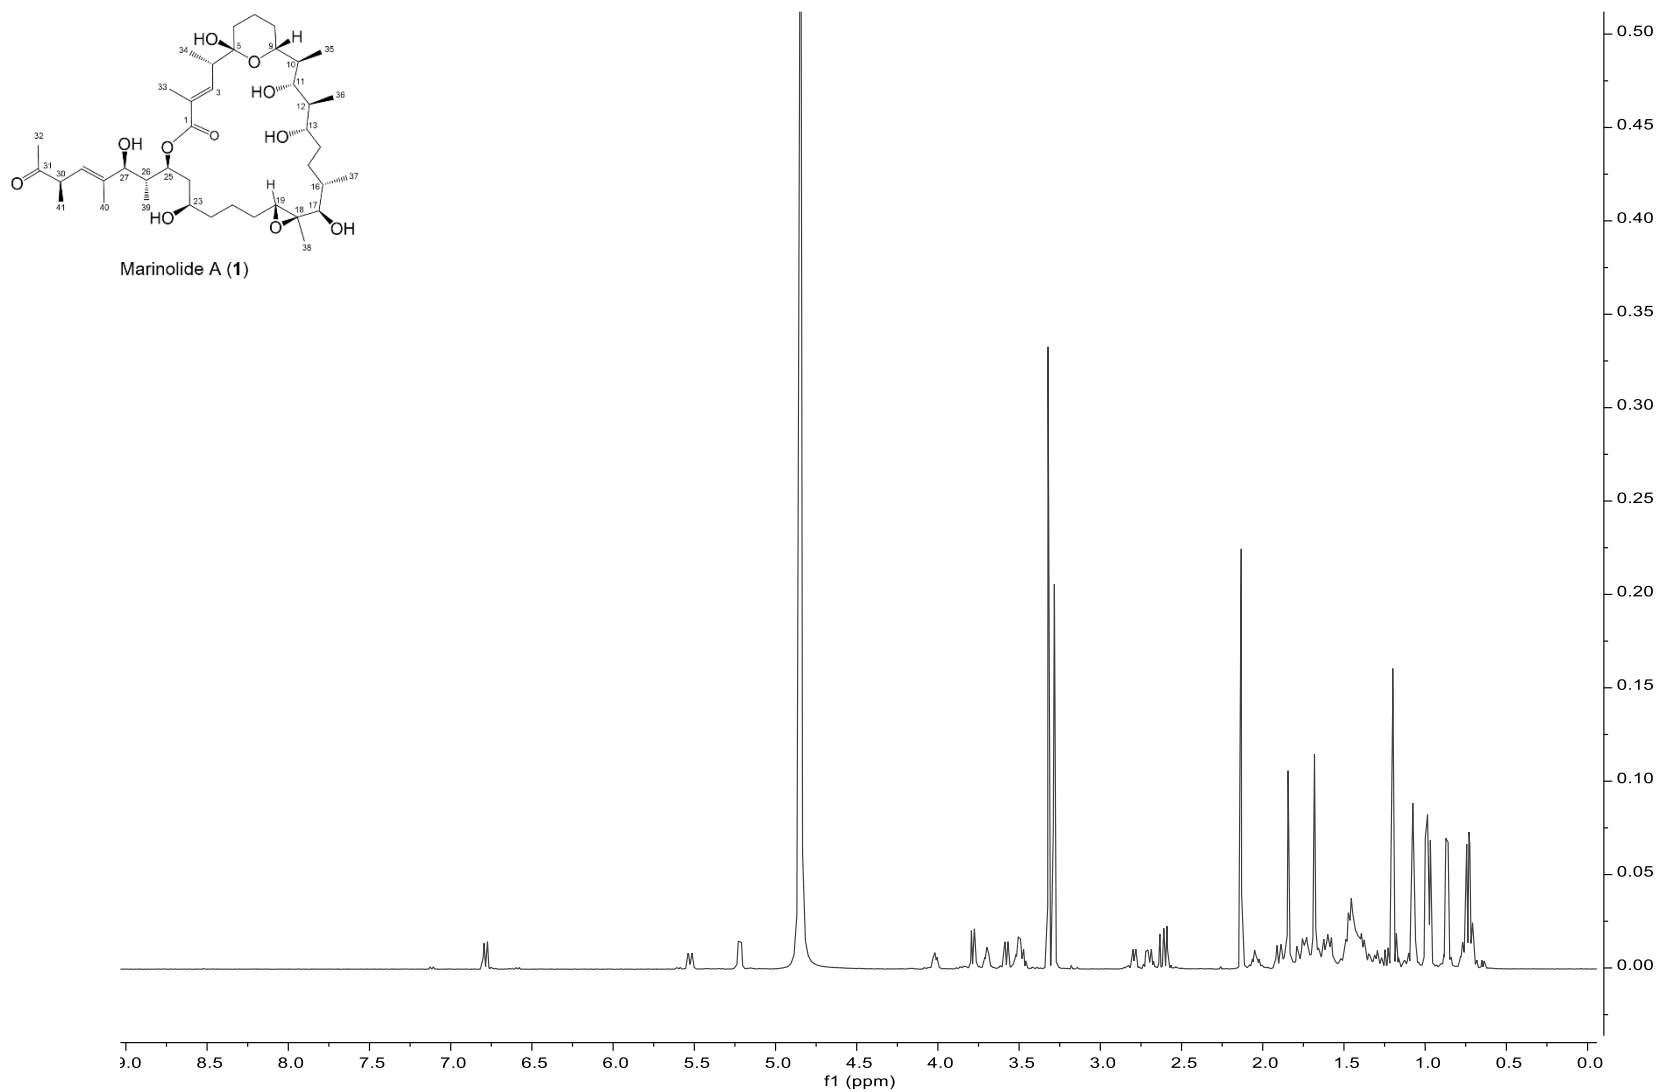

**Figure S11.**  $^1\text{H}$  NMR spectrum of marinolide A (**1**) in  $\text{CD}_3\text{OD}$ .

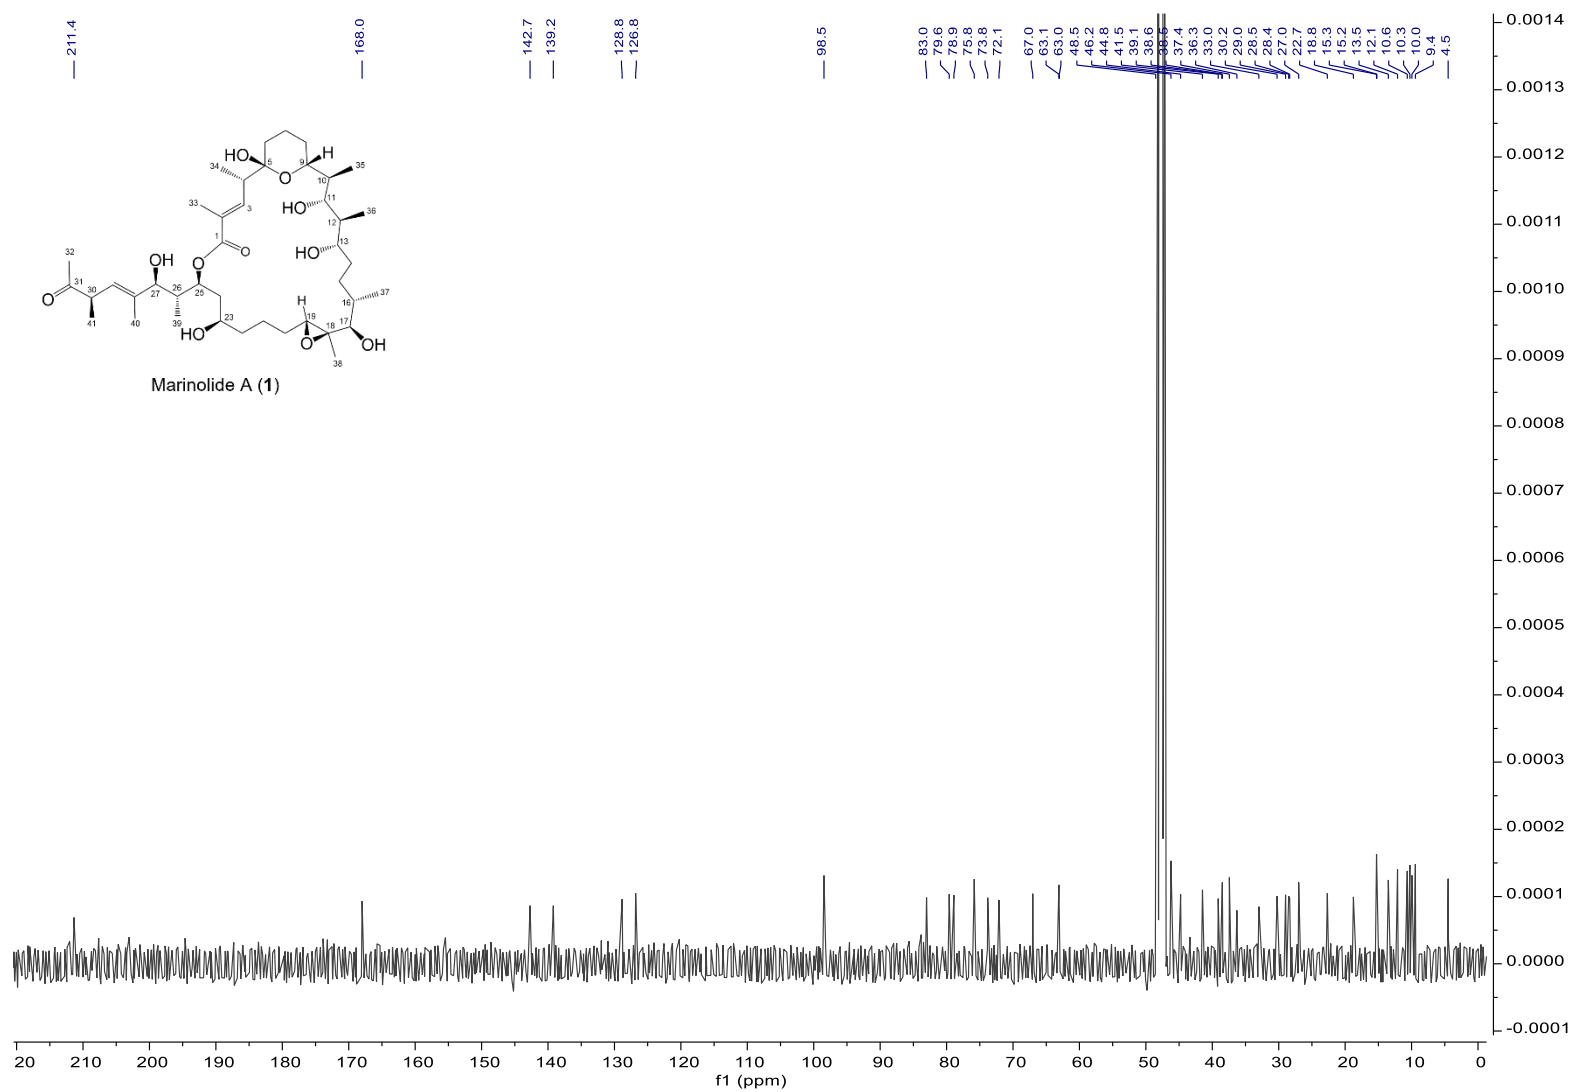

**Figure S12.**  $^{13}\text{C}$  NMR spectrum of marinolide A (**1**) in  $\text{CD}_3\text{OD}$ .

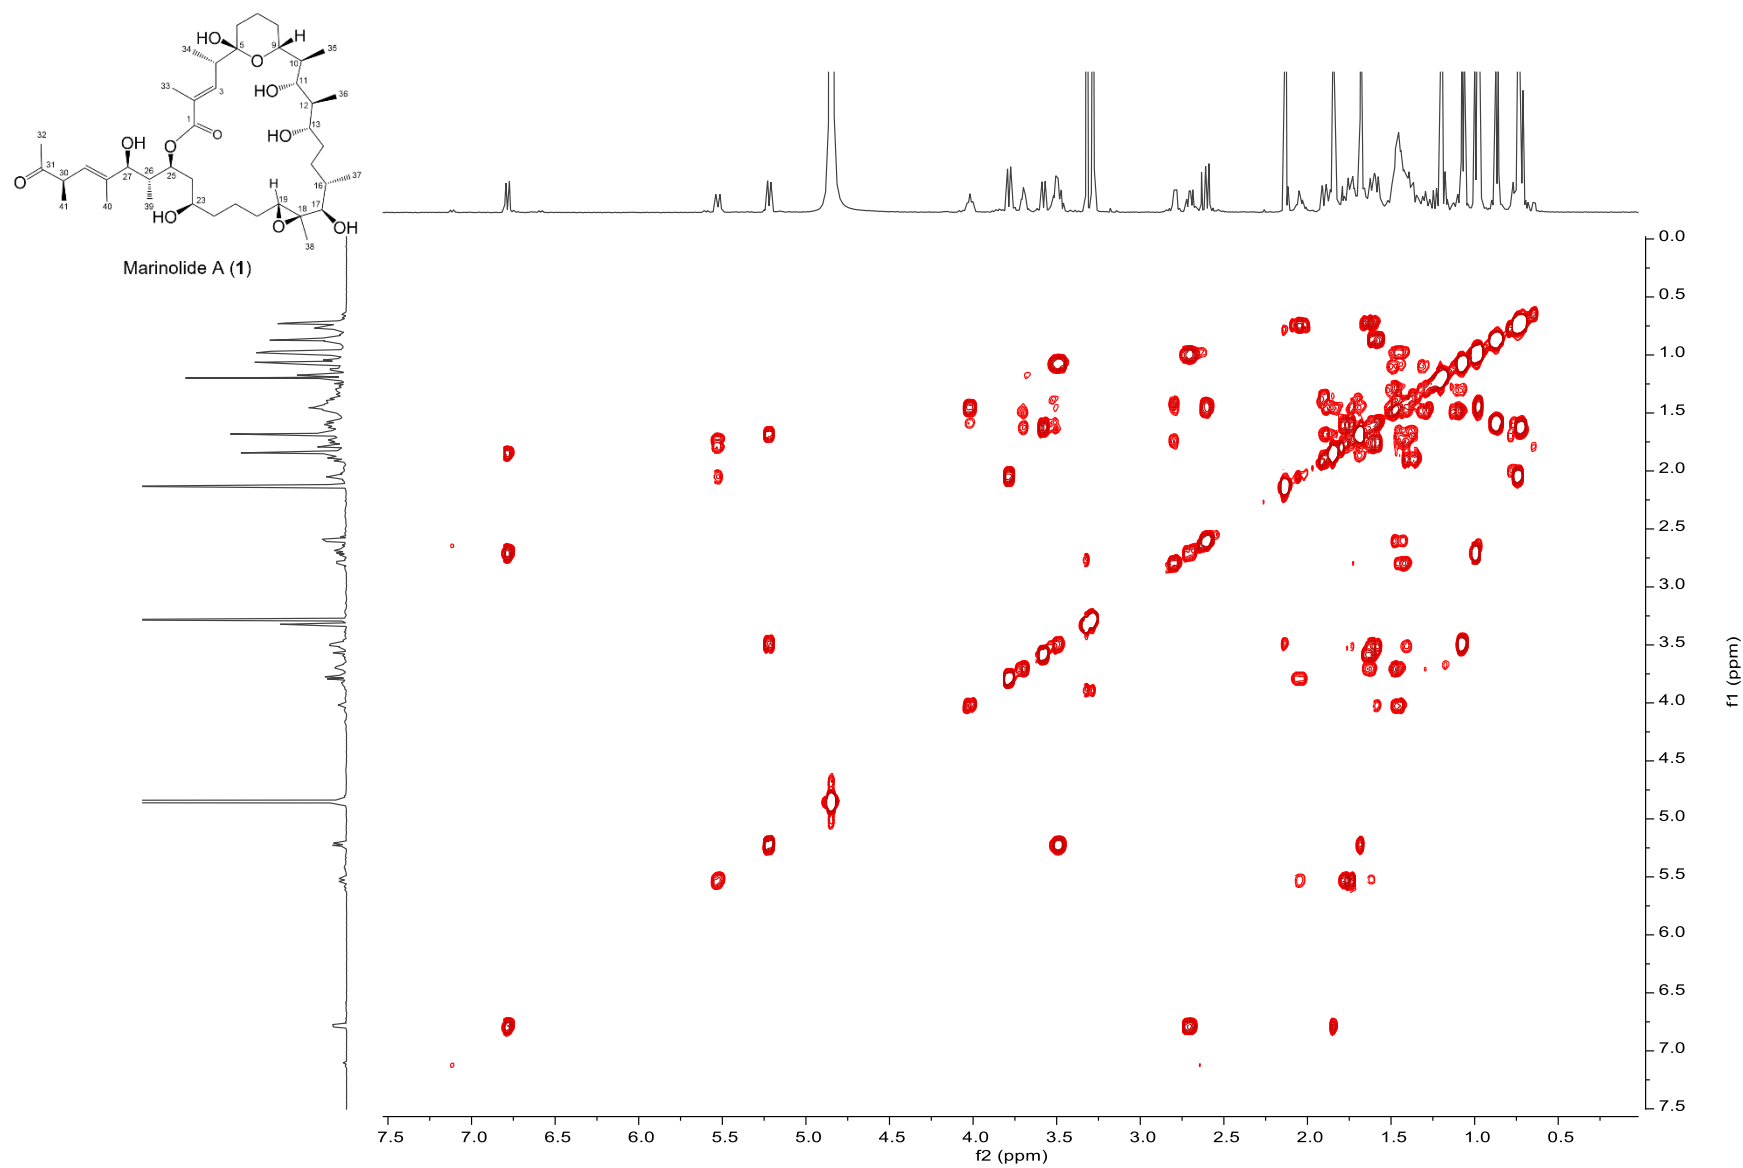

**Figure S13.** COSY NMR spectrum of marinolide A (**1**) in  $\text{CD}_3\text{OD}$ .

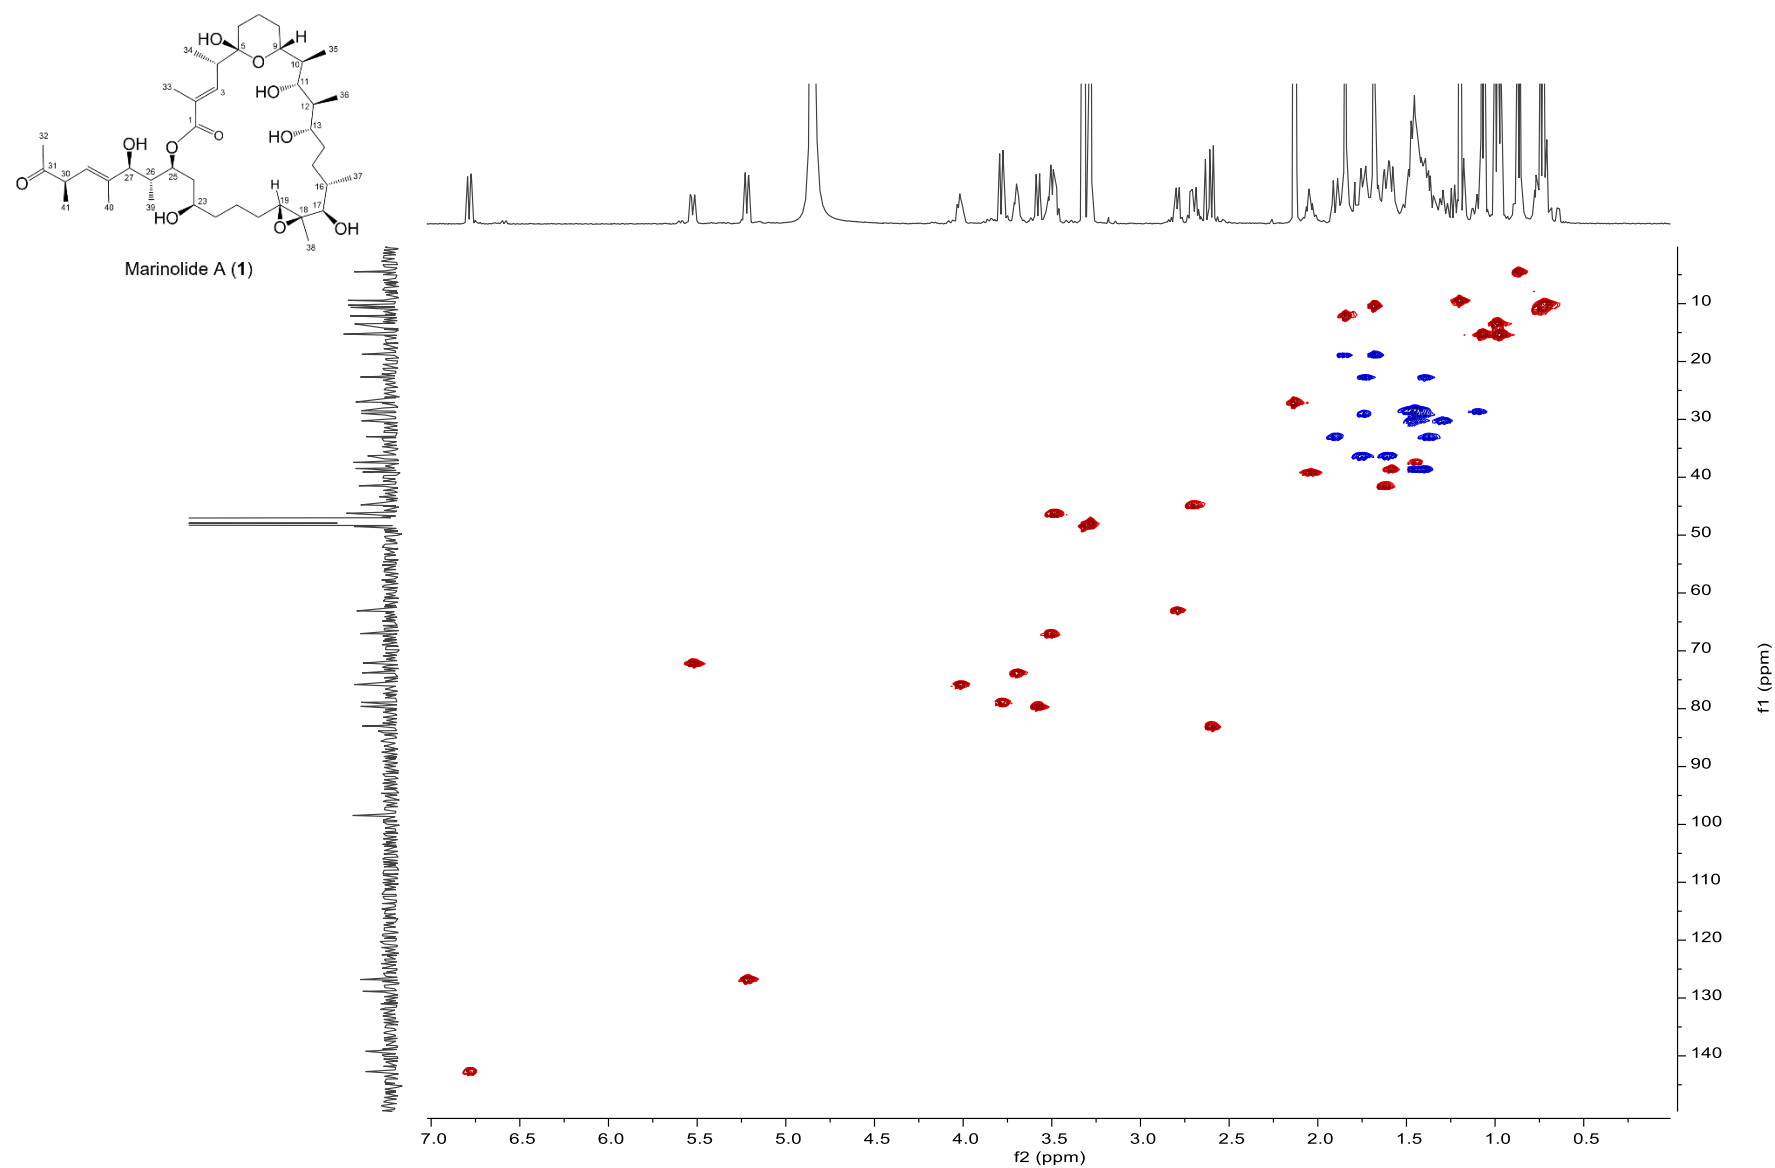

**Figure S14.** HSQC NMR spectrum of marinolide A (**1**) in  $\text{CD}_3\text{OD}$ .

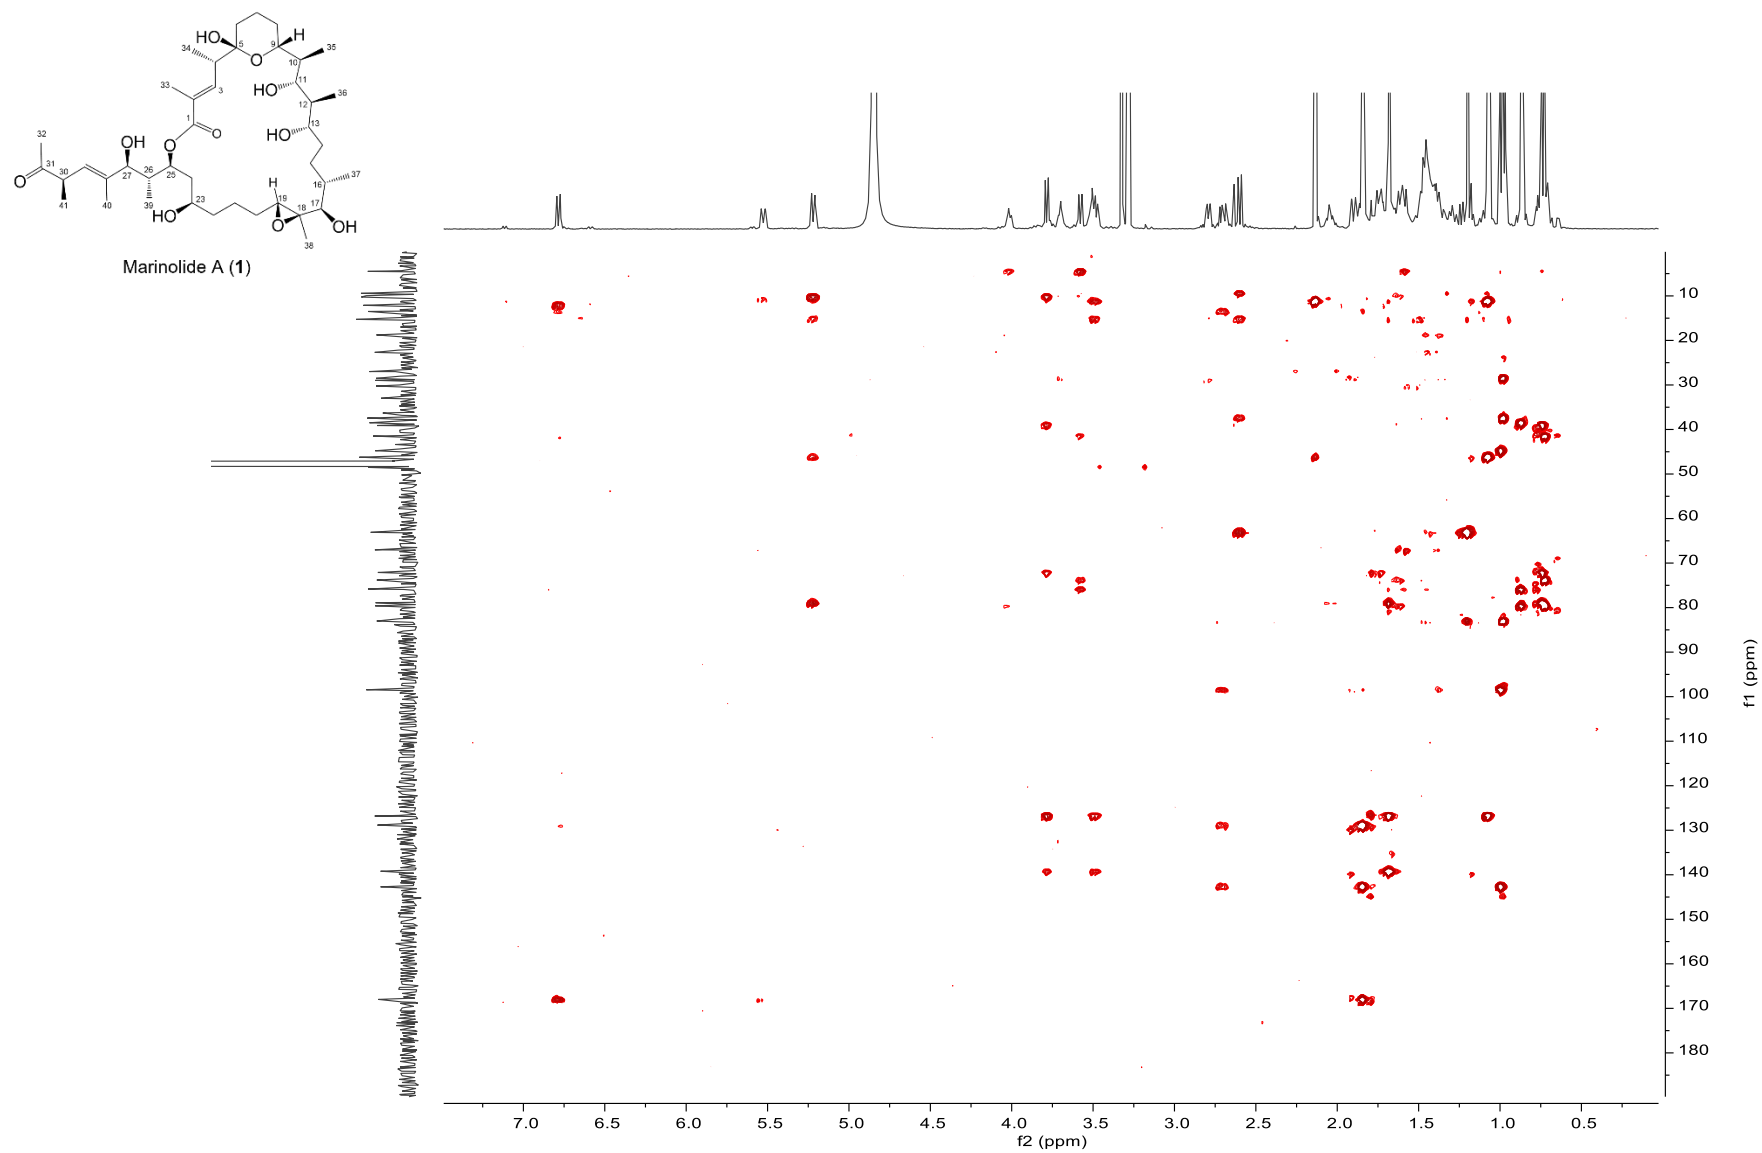

**Figure S15.** HMBC NMR spectrum of marinolide A (**1**) in CD<sub>3</sub>OD.

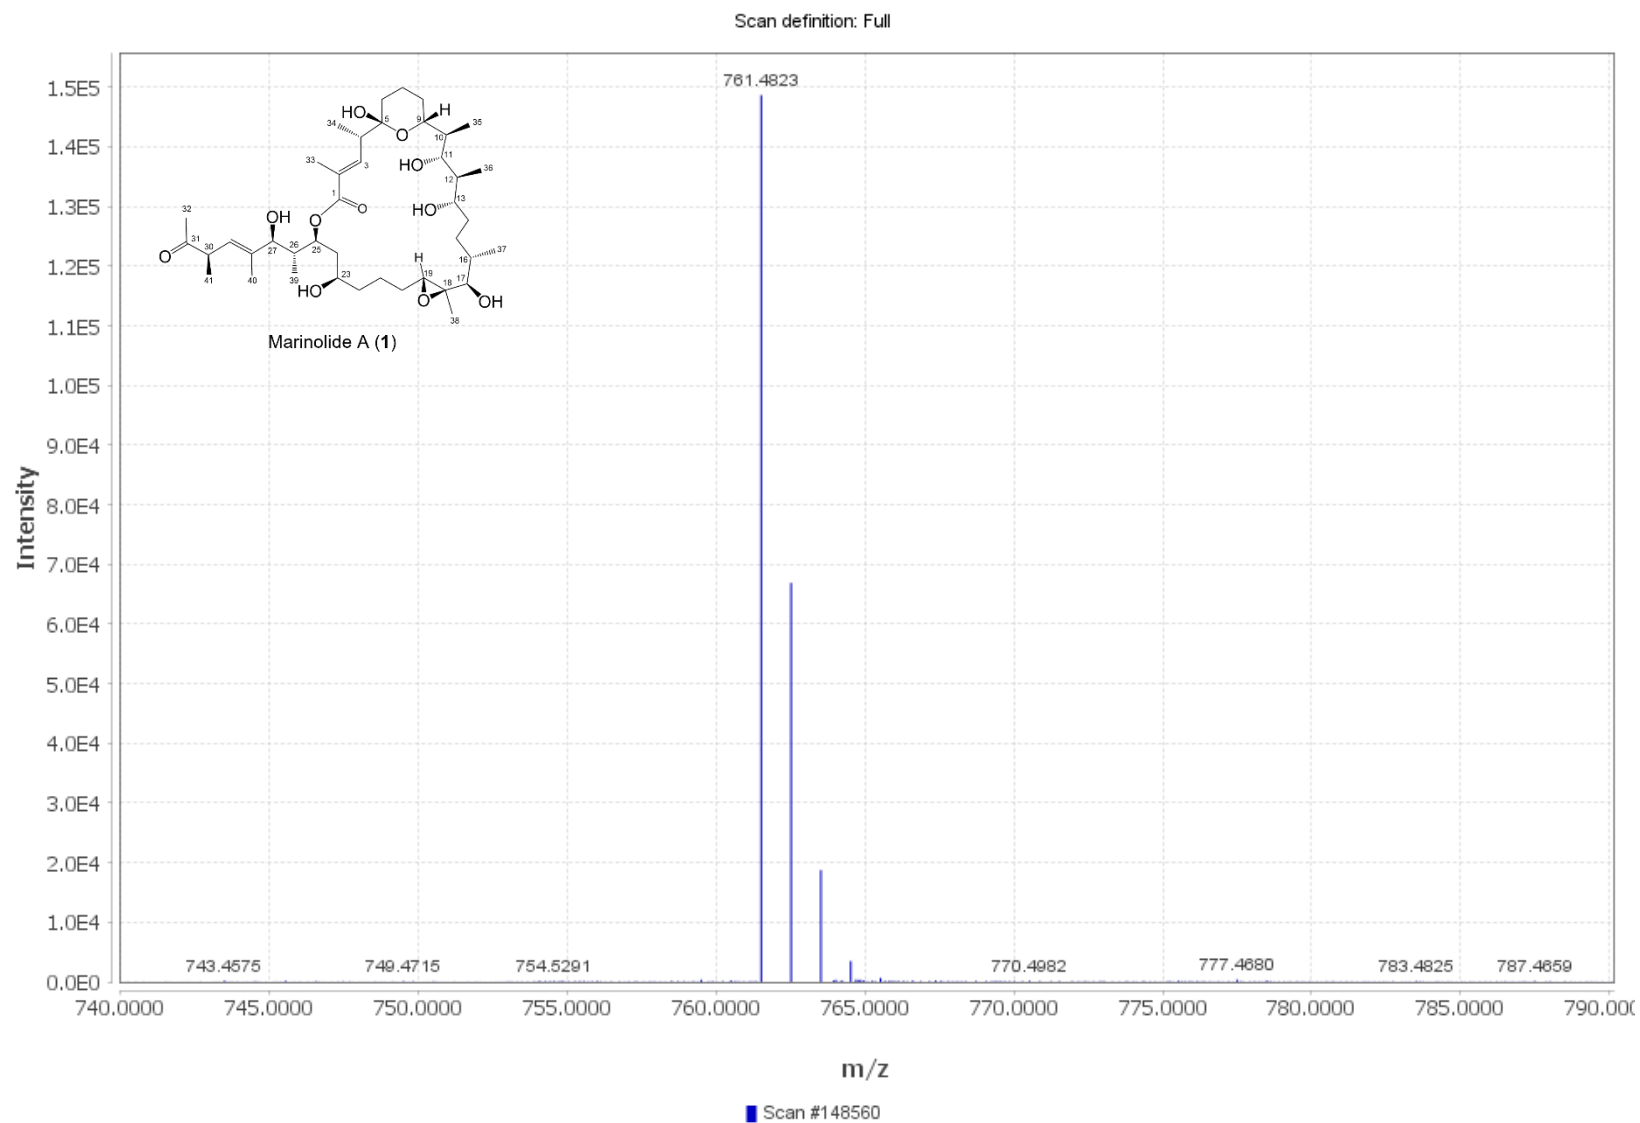

**Figure S16.** HR-ESI-TOFMS spectrum of marinolide A (1).

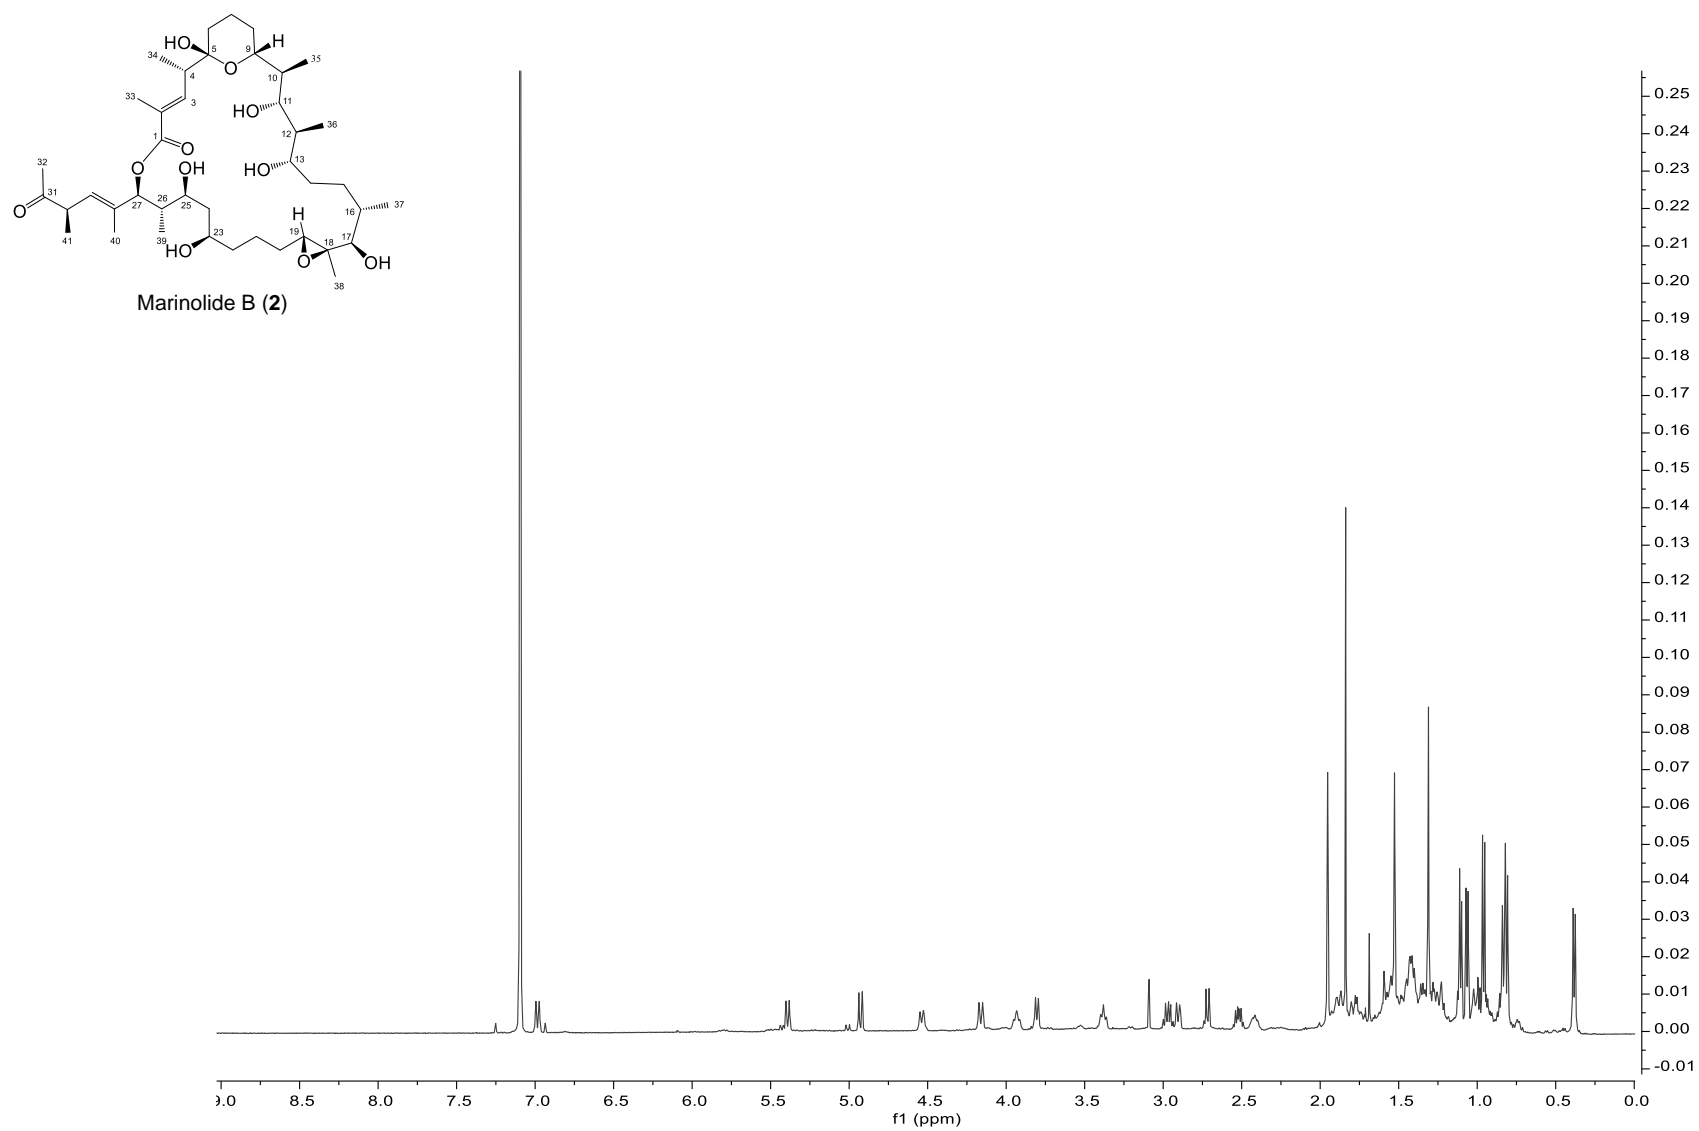

**Figure S17.**  $^1\text{H}$  NMR spectrum of marinolide B (**2**) in benzene- $d_6$ .

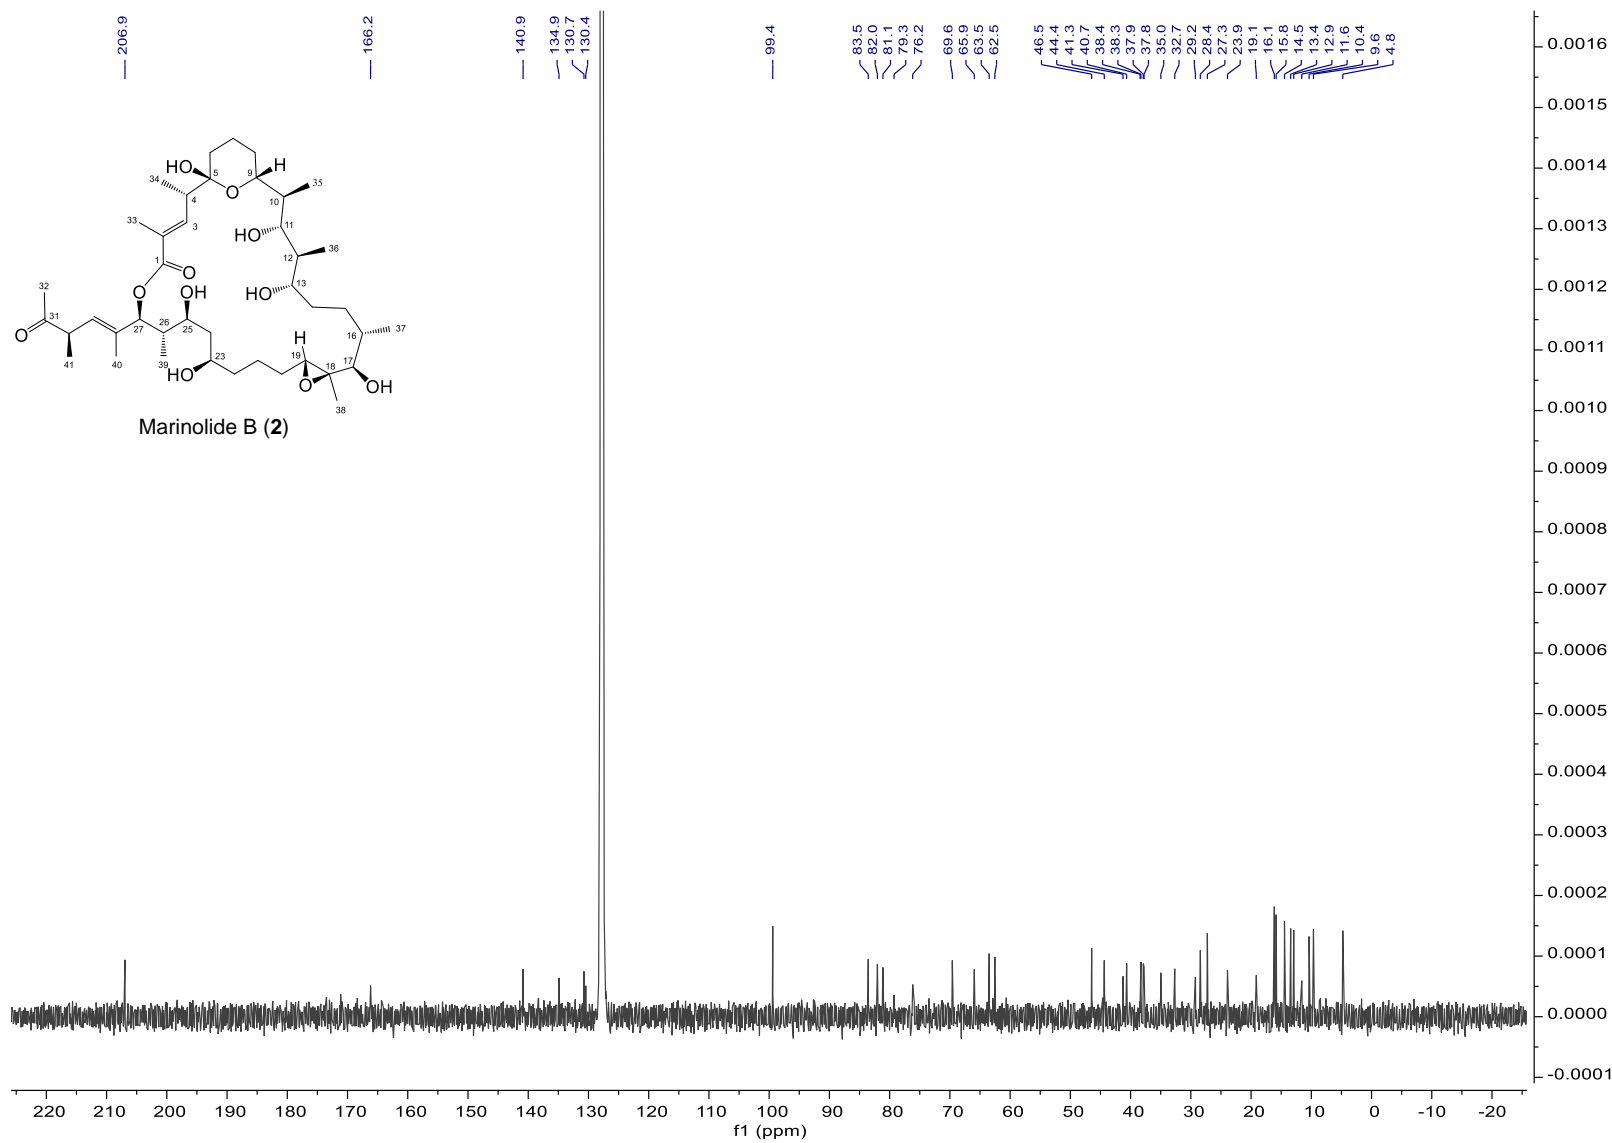

**Figure S18.**  $^{13}\text{C}$  NMR spectrum of marinolide B (2) in benzene- $d_6$ .



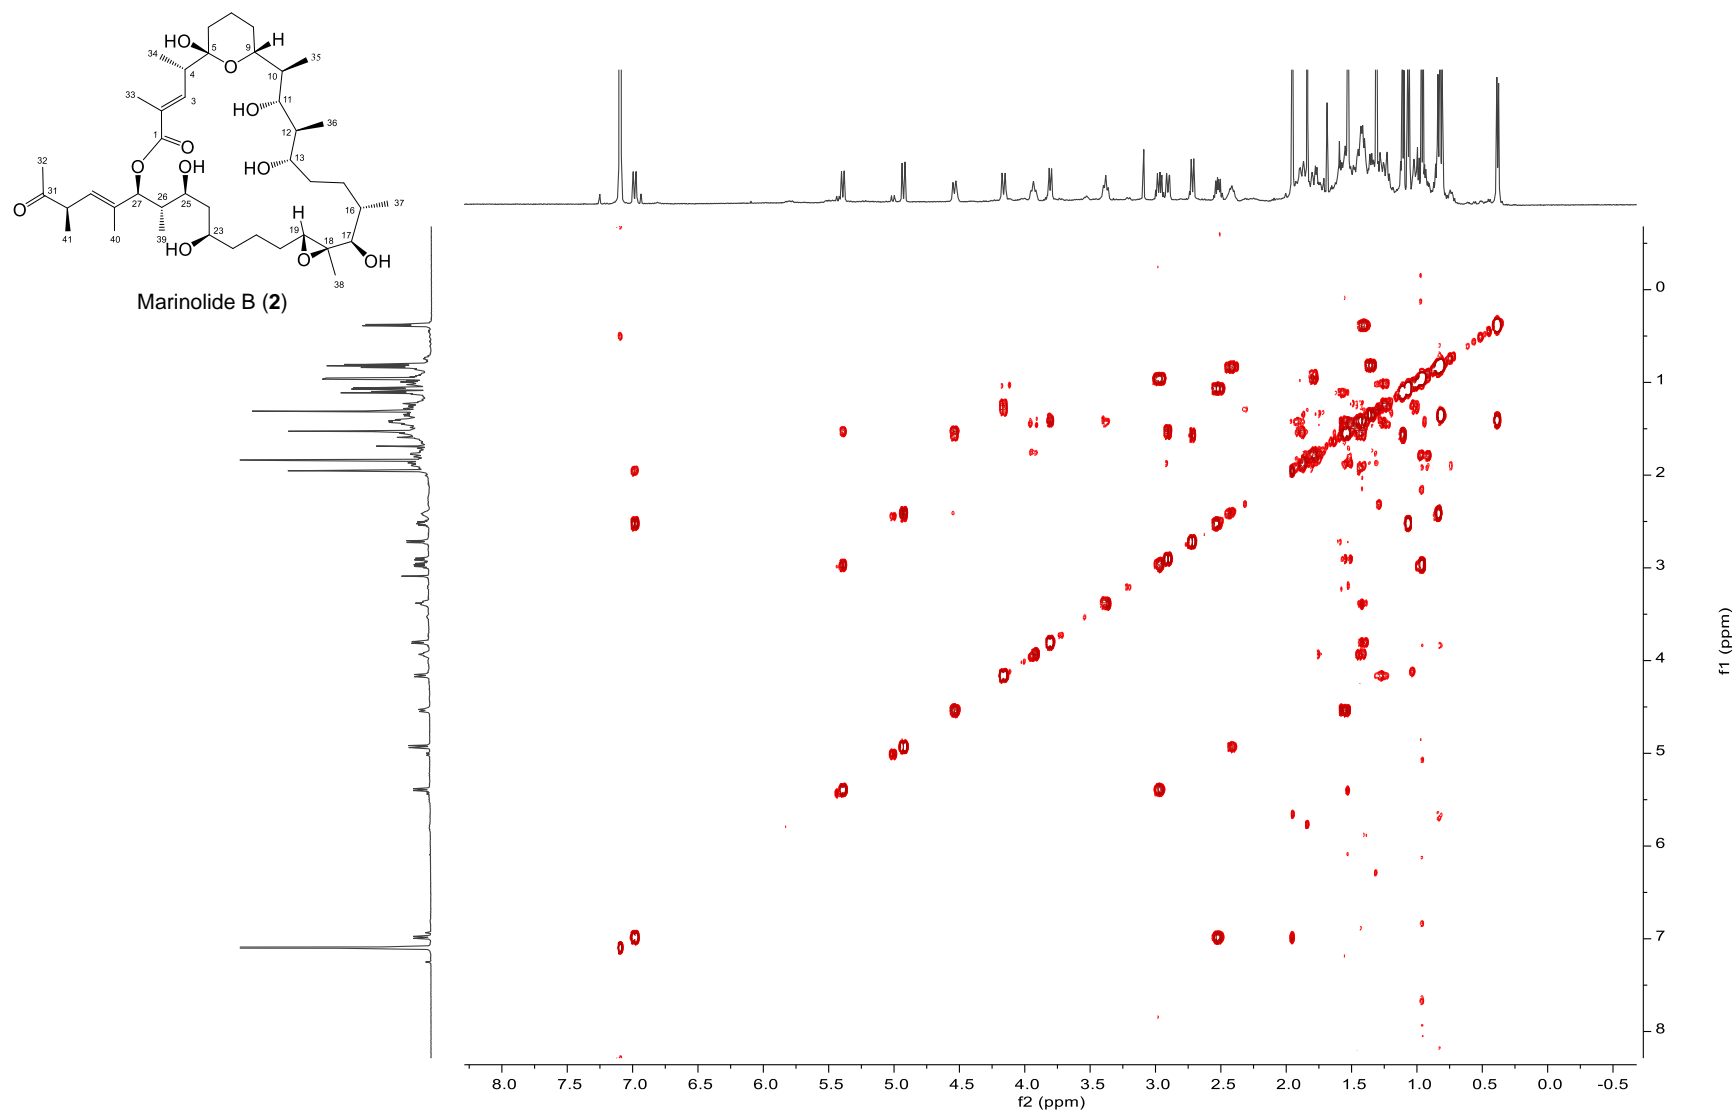

**Figure S19.** COSY NMR spectrum of marinolide B (2) in benzene- $d_6$ .

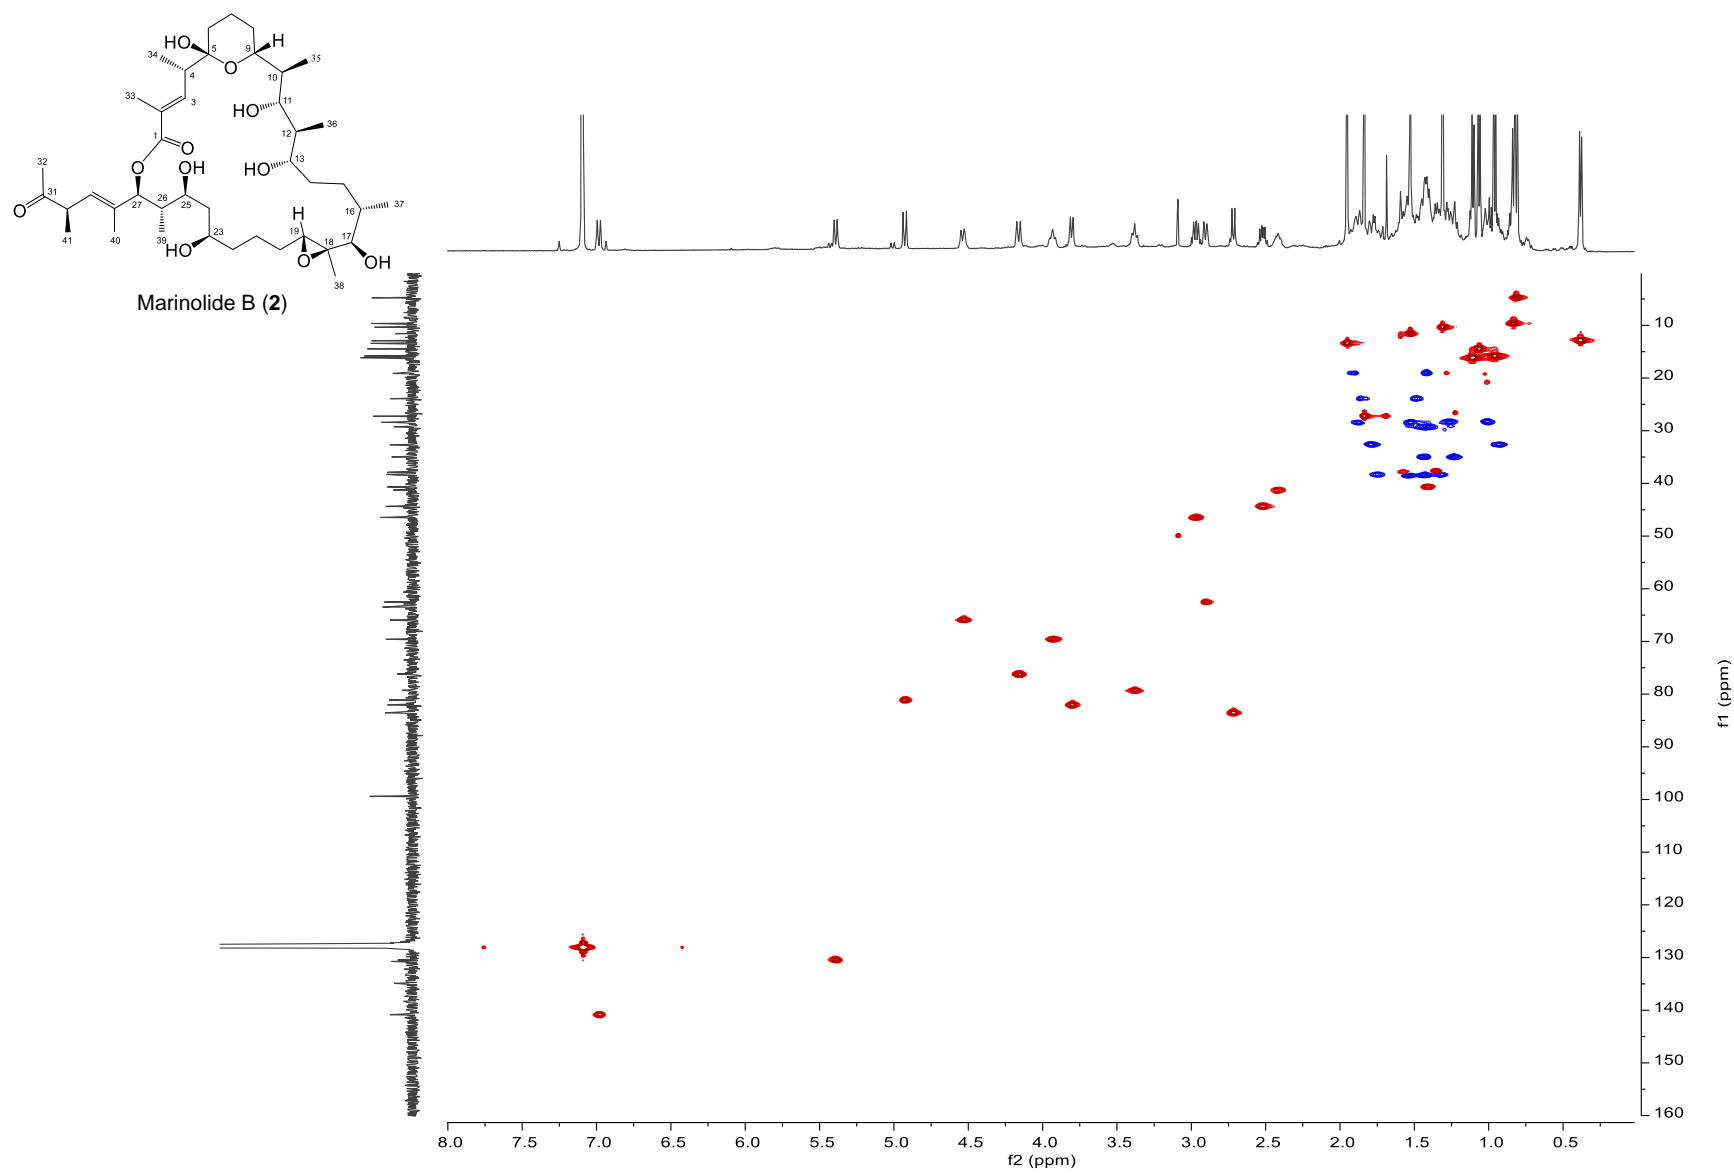

**Figure S20.** HSQC NMR spectrum of marinolide B (2) in benzene- $d_6$ .

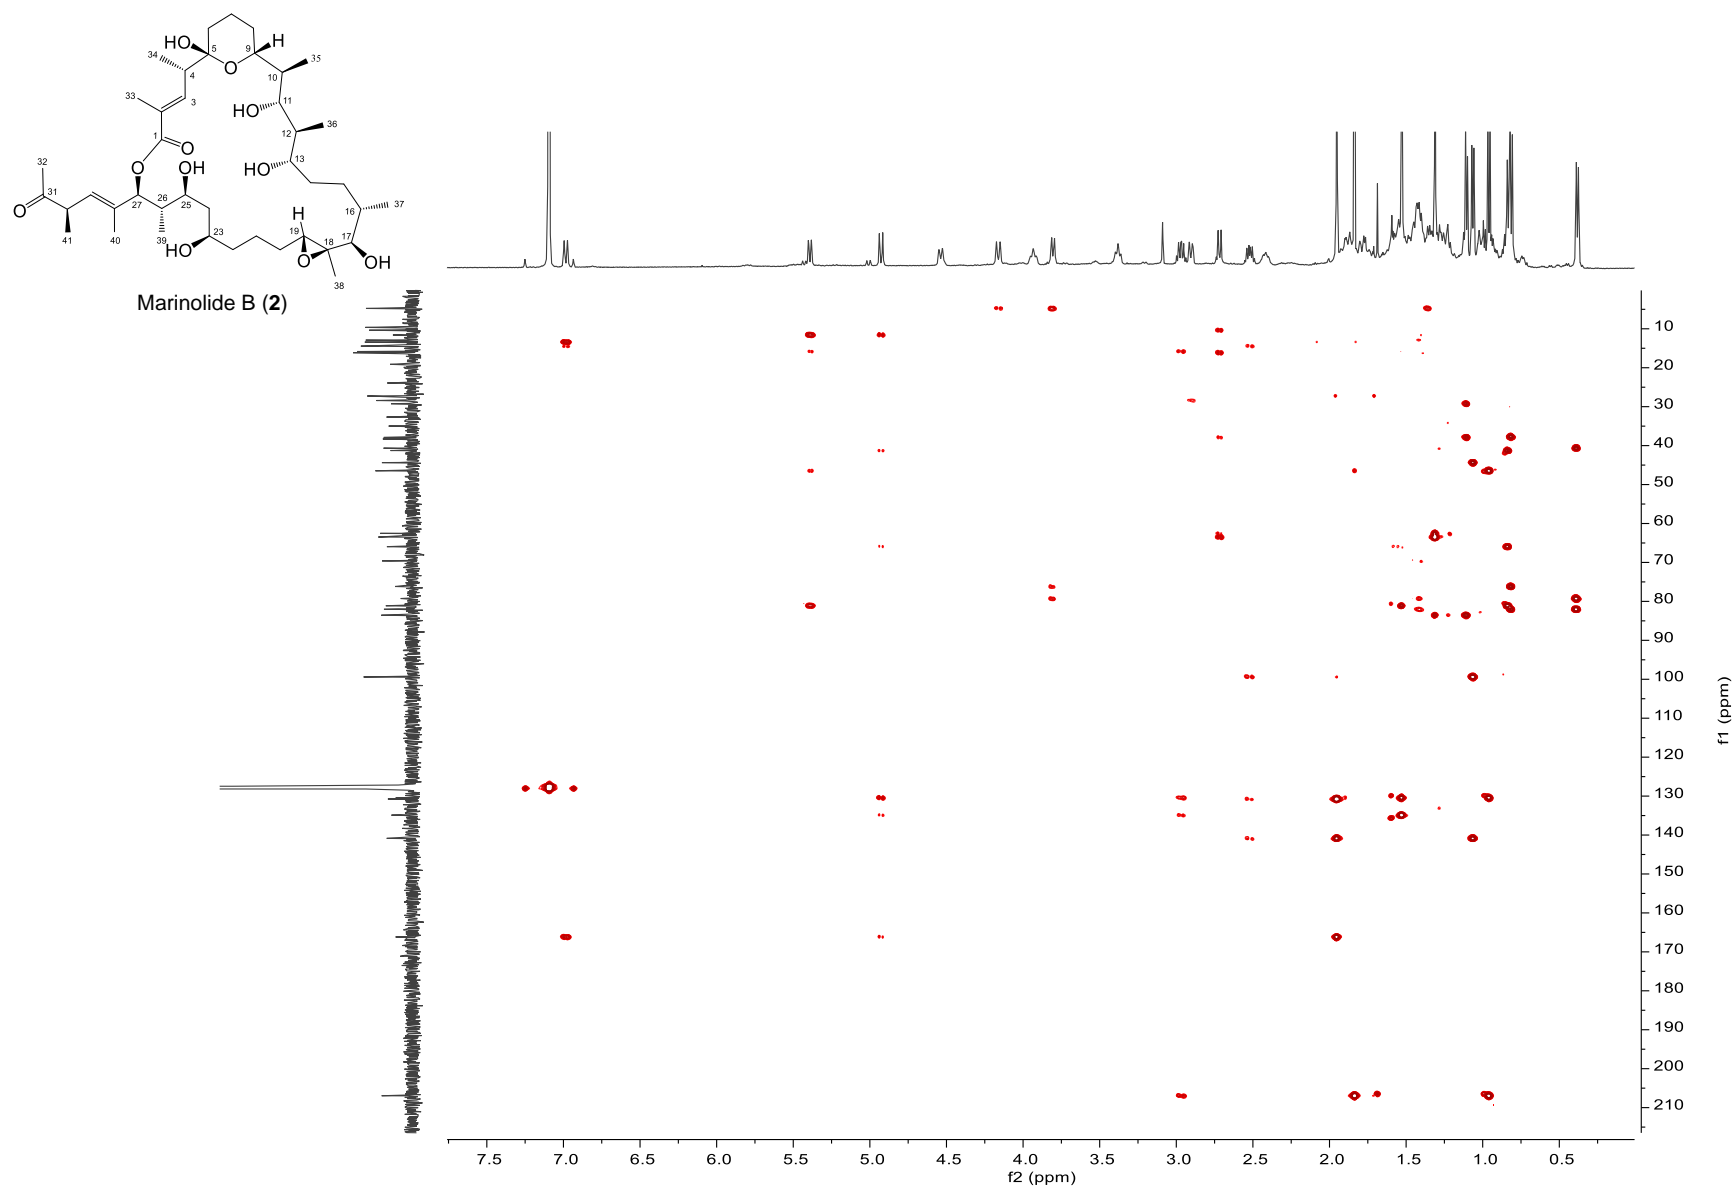

**Figure S21.** HMBC NMR spectrum of marinolide B (2) in benzene-*d*<sub>6</sub>

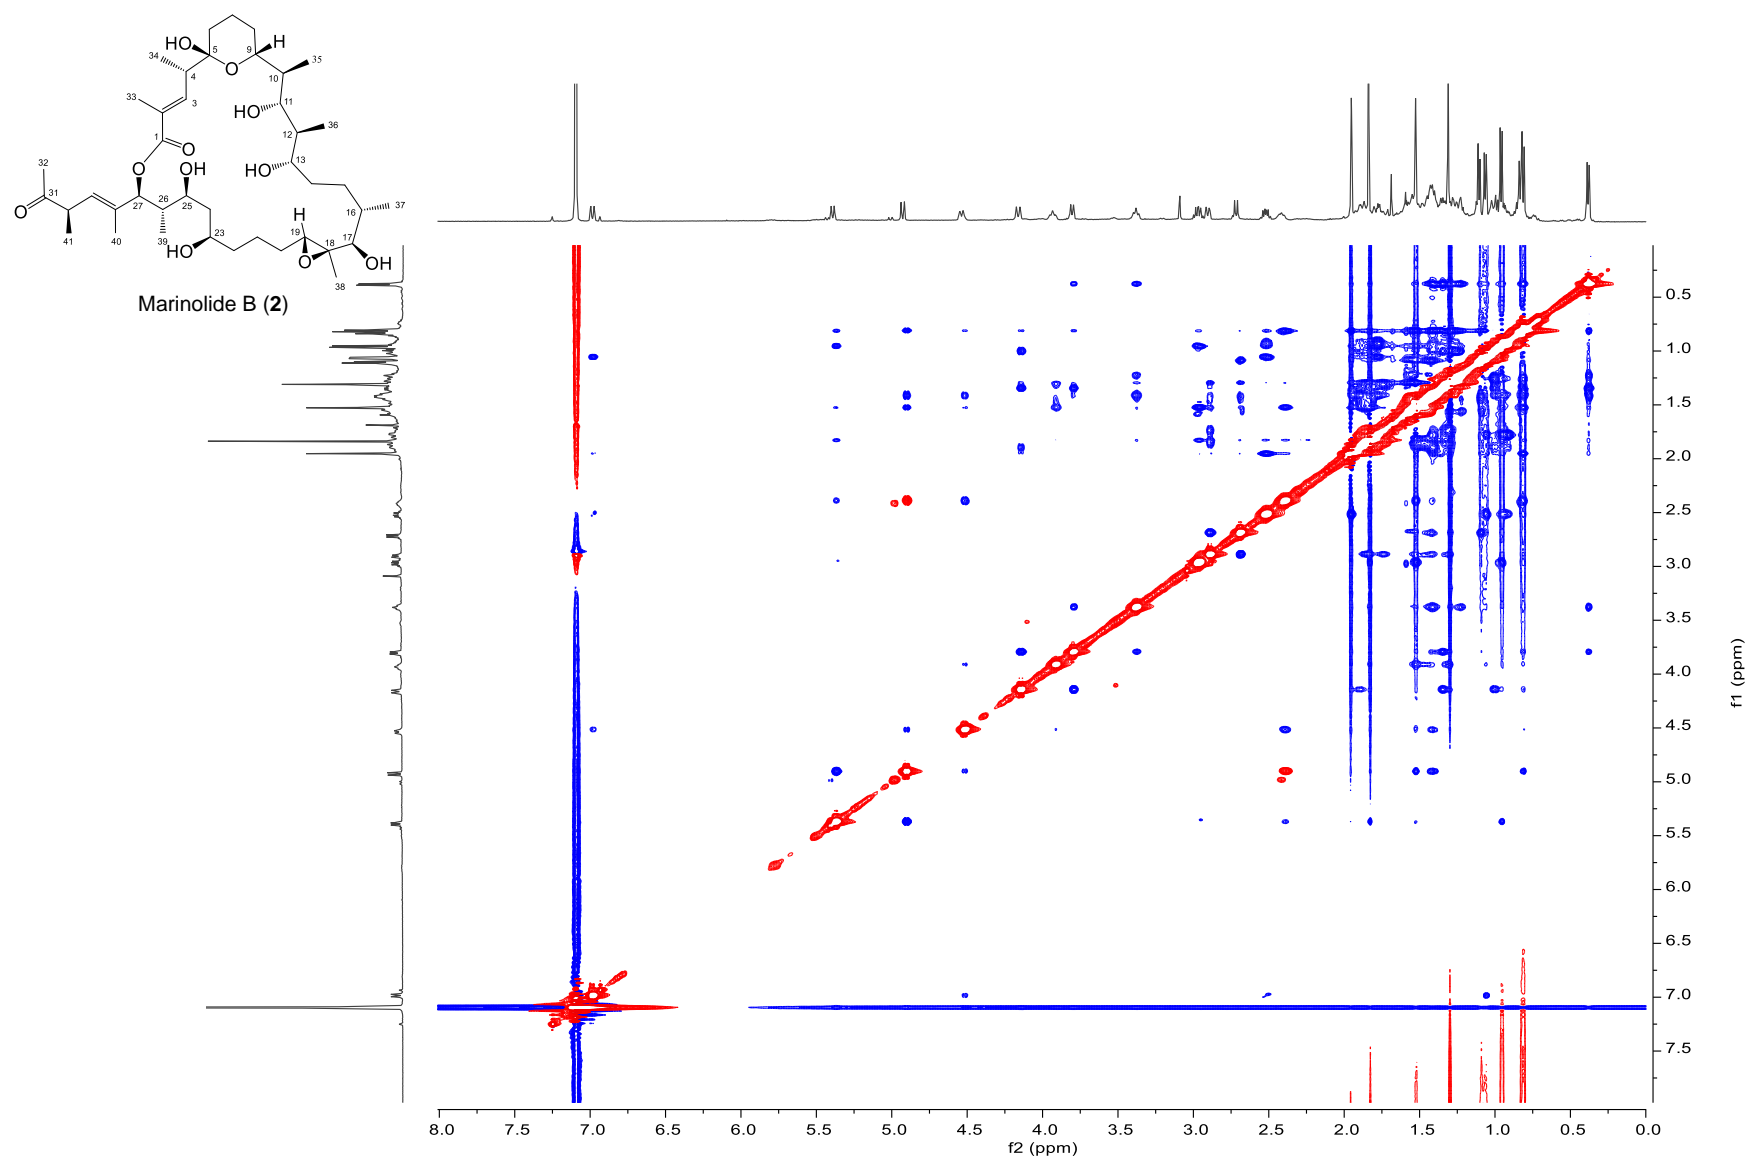

**Figure S22.** ROESY NMR spectrum of marinolide B (2) in benzene- $d_6$ .

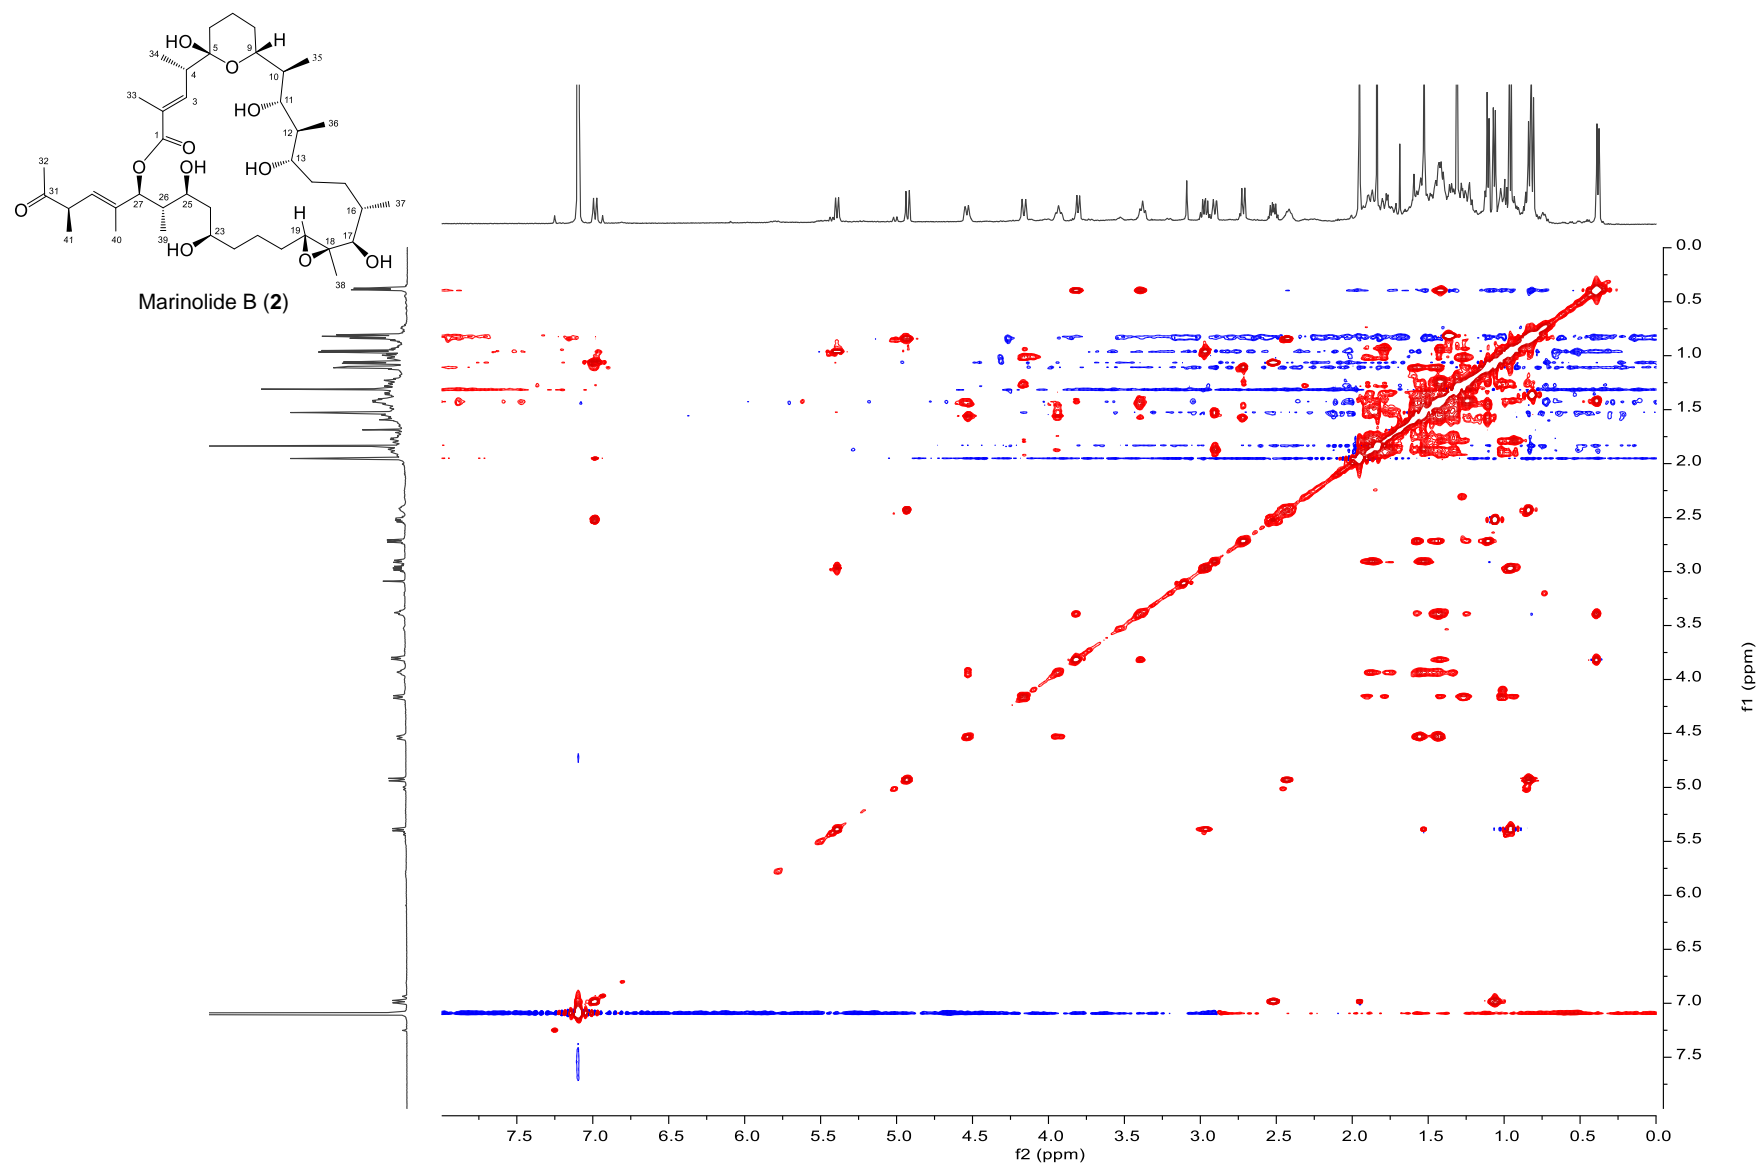

**Figure S23.** TOCSY NMR spectrum of marinolide B (2) in benzene- $d_6$ .

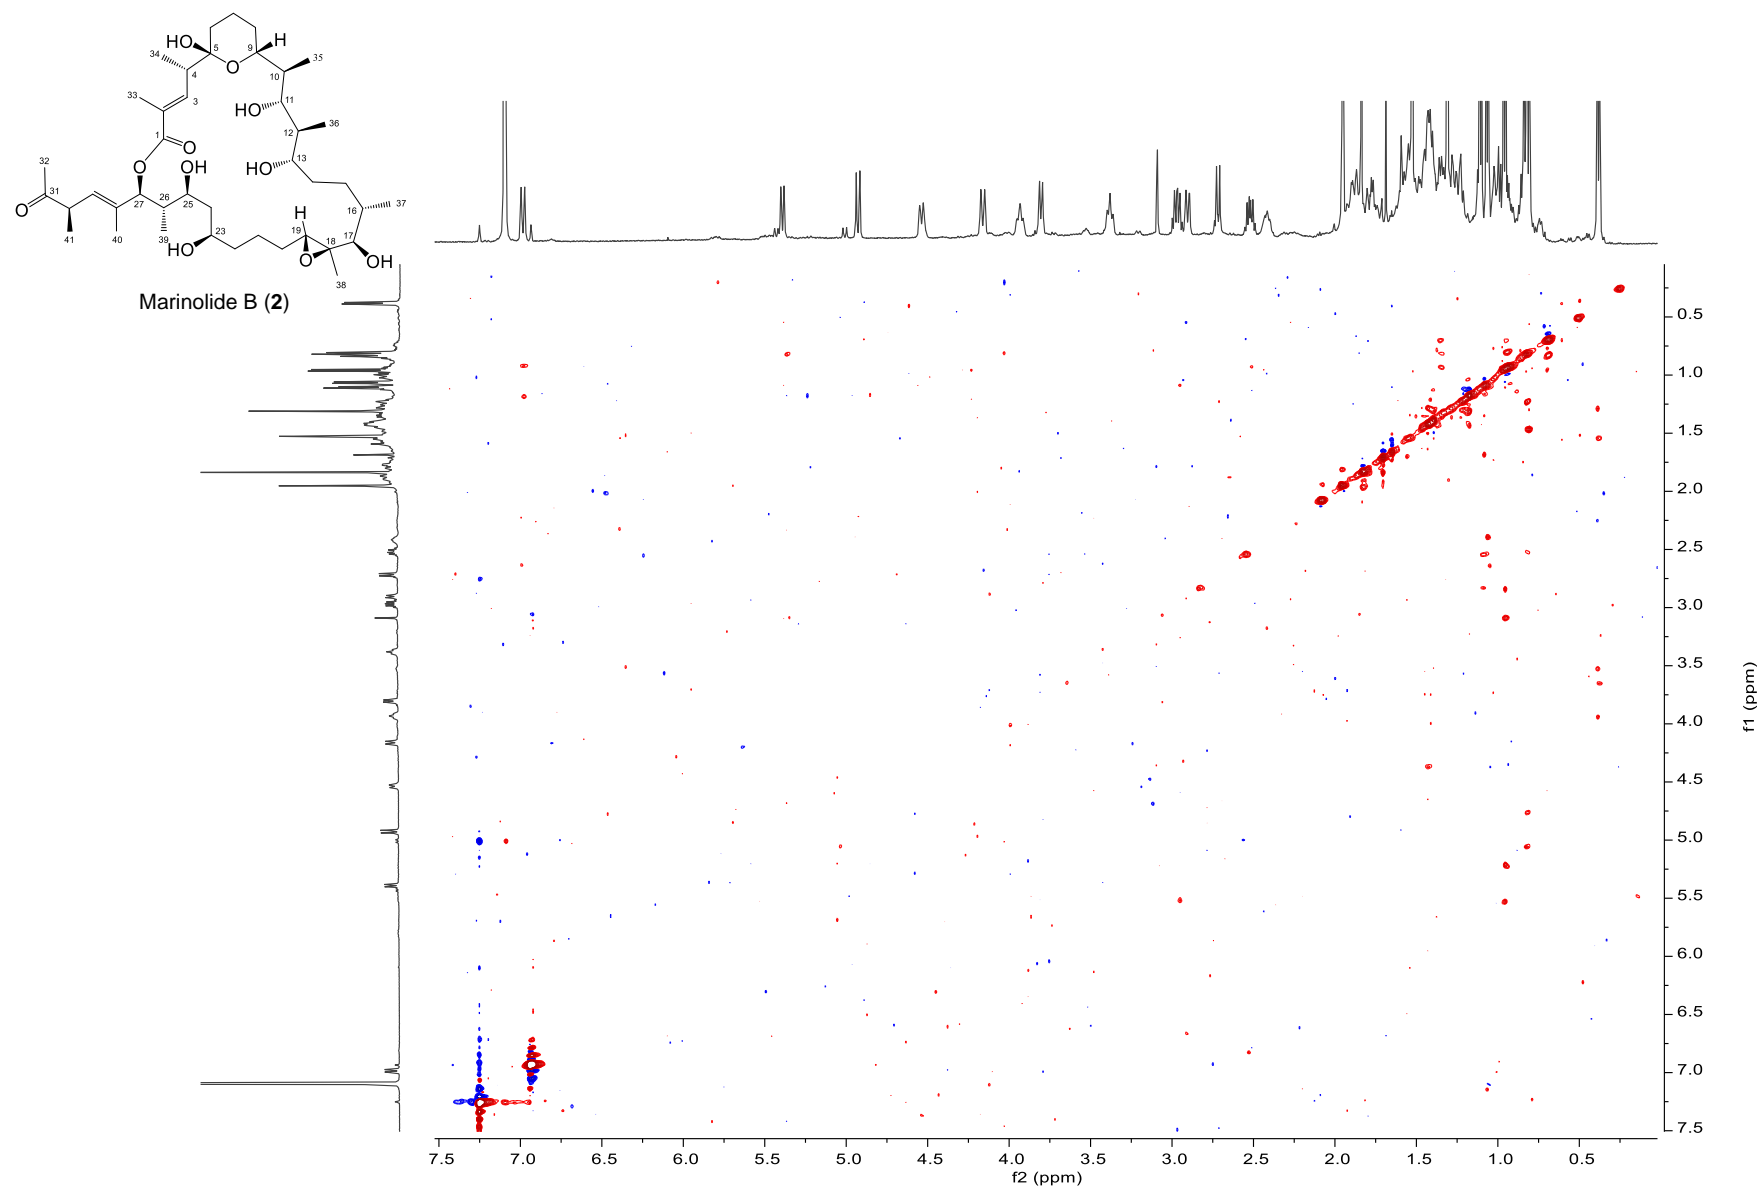

**Figure S24.** HETLOC NMR spectrum of marinolide B (2) in benzene-*d*<sub>6</sub>.

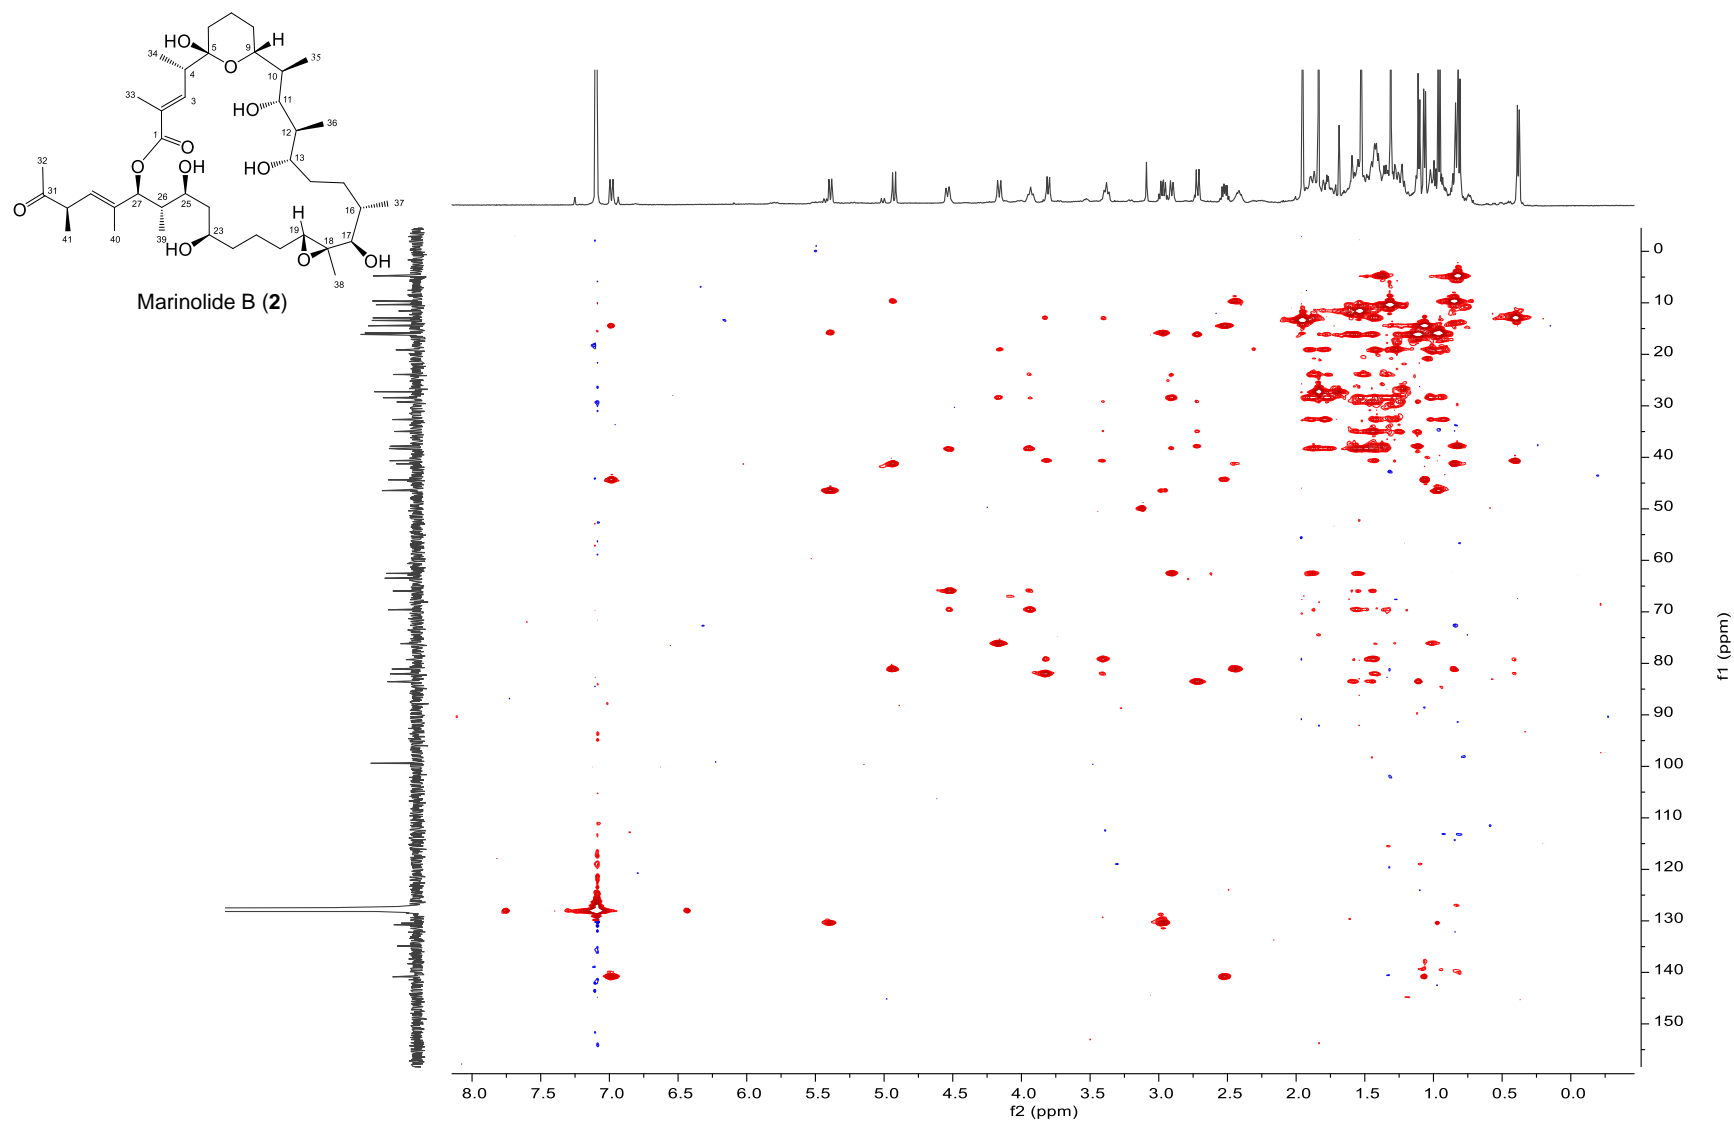

**Figure S25.** HSQC-TOCSY NMR spectrum of marinolide B (**2**) in benzene-*d*<sub>6</sub>.

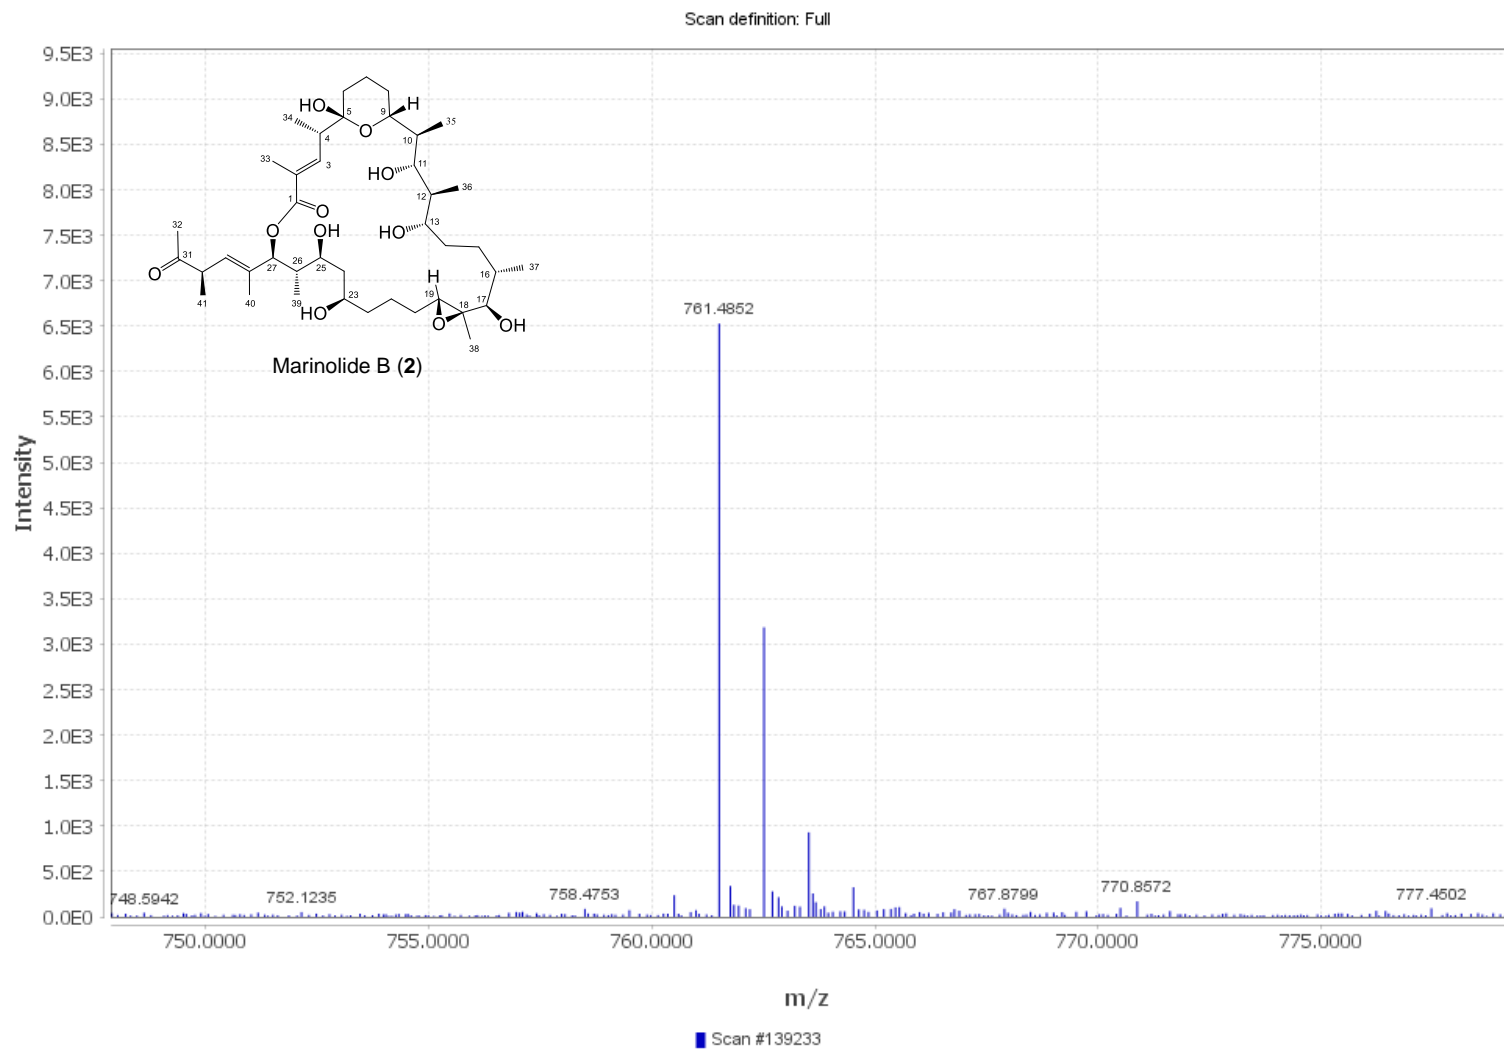

**Figure S26.** HR-ESI-TOFMS spectrum of marinolide B (2).



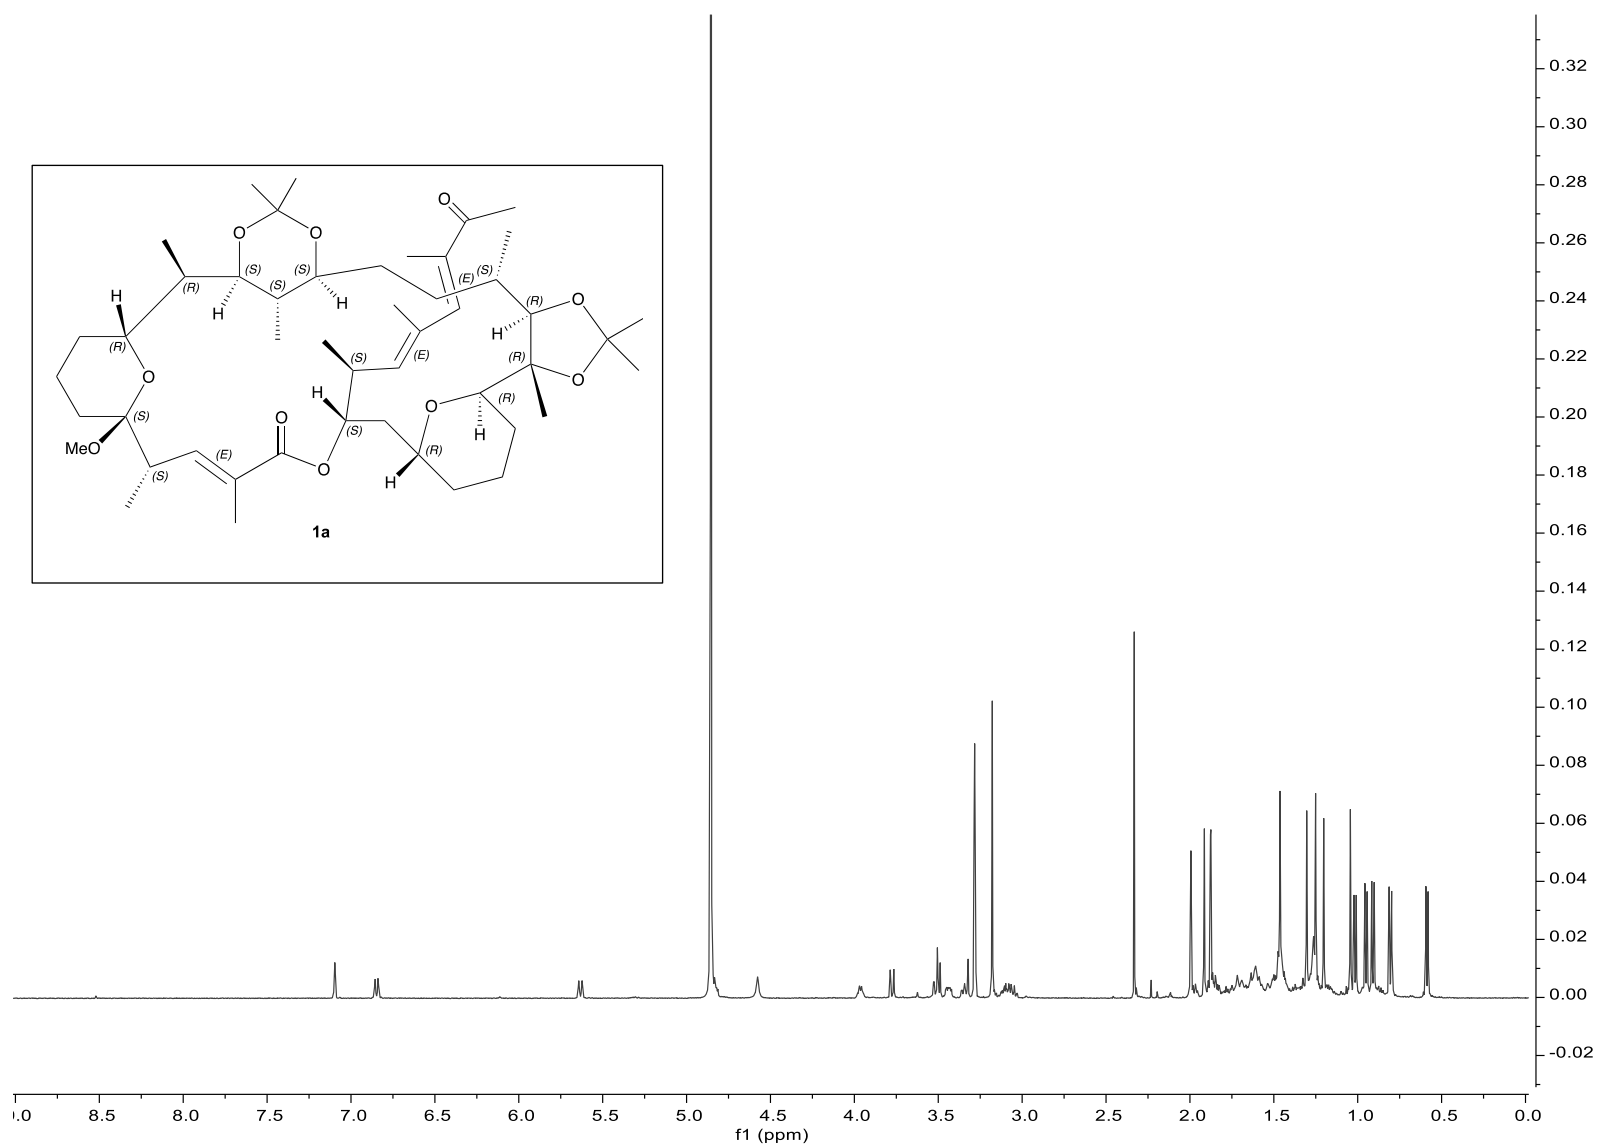

**Figure S27.**  $^1\text{H}$  NMR spectrum of *bis*-acetonide (**1a**) in benzene- $d_6$ .

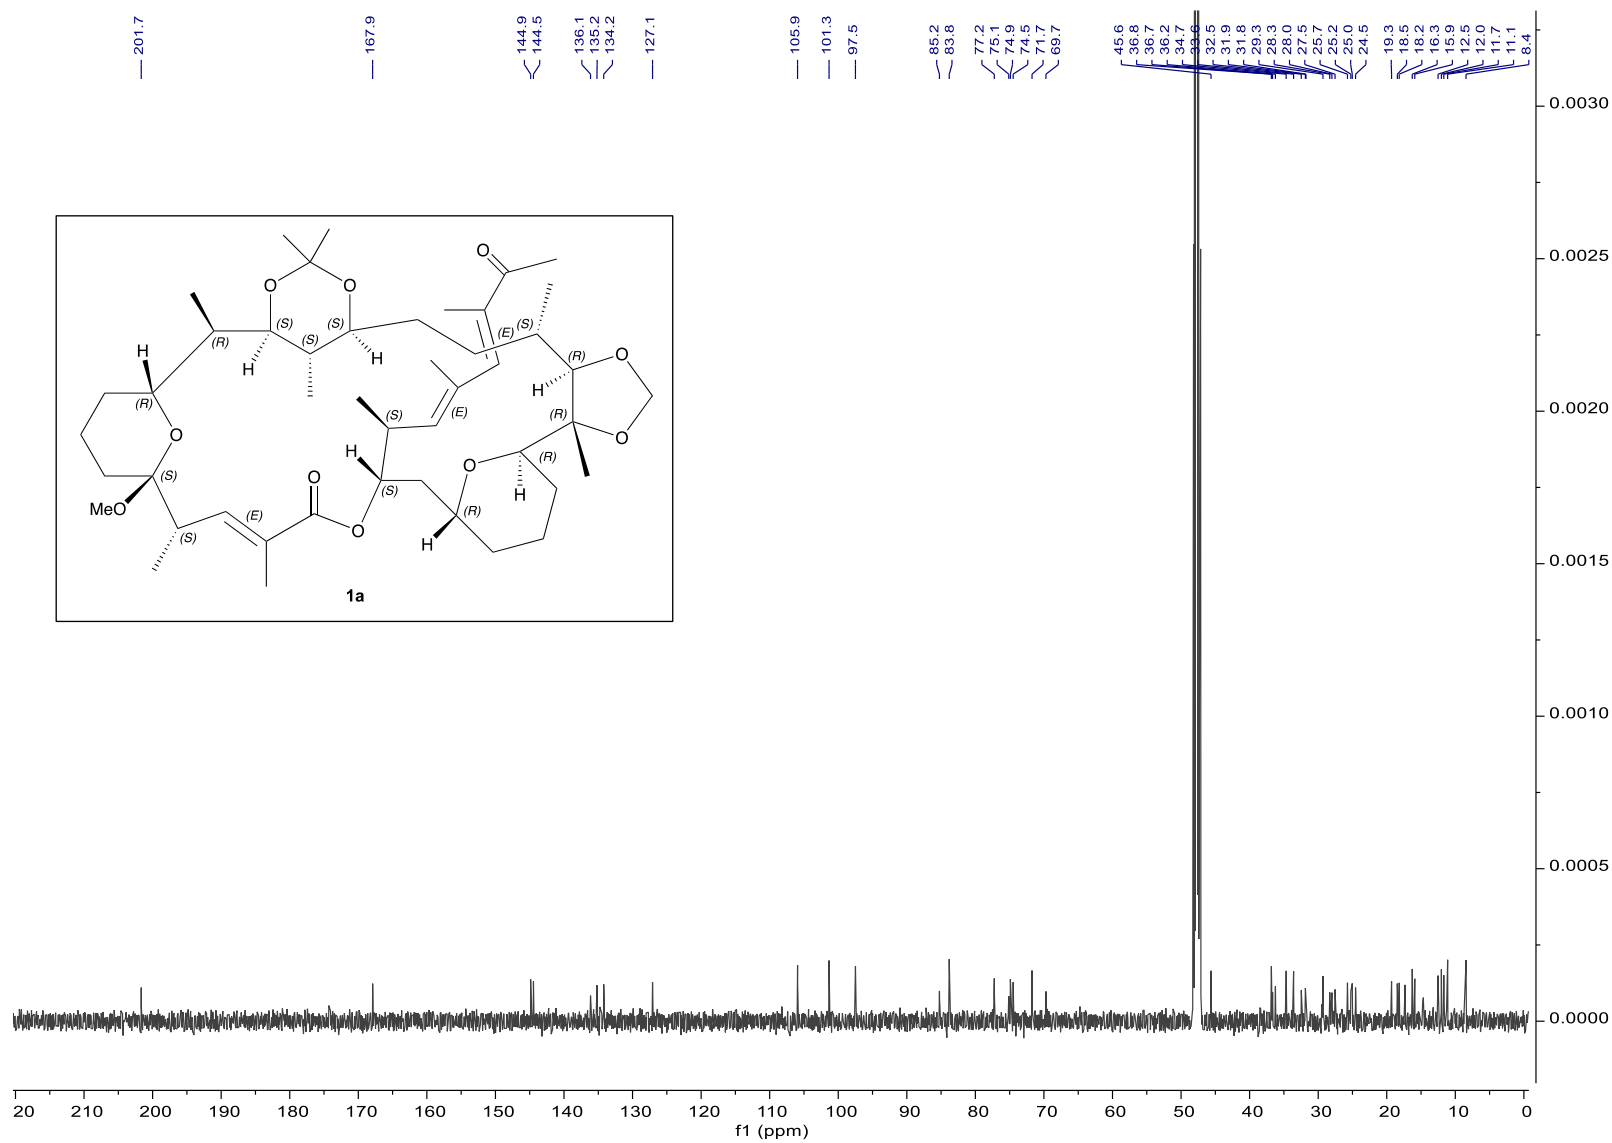

**Figure S28.**  $^{13}\text{C}$  NMR spectrum of *bis*-acetonide (**1a**) in benzene- $d_6$ .

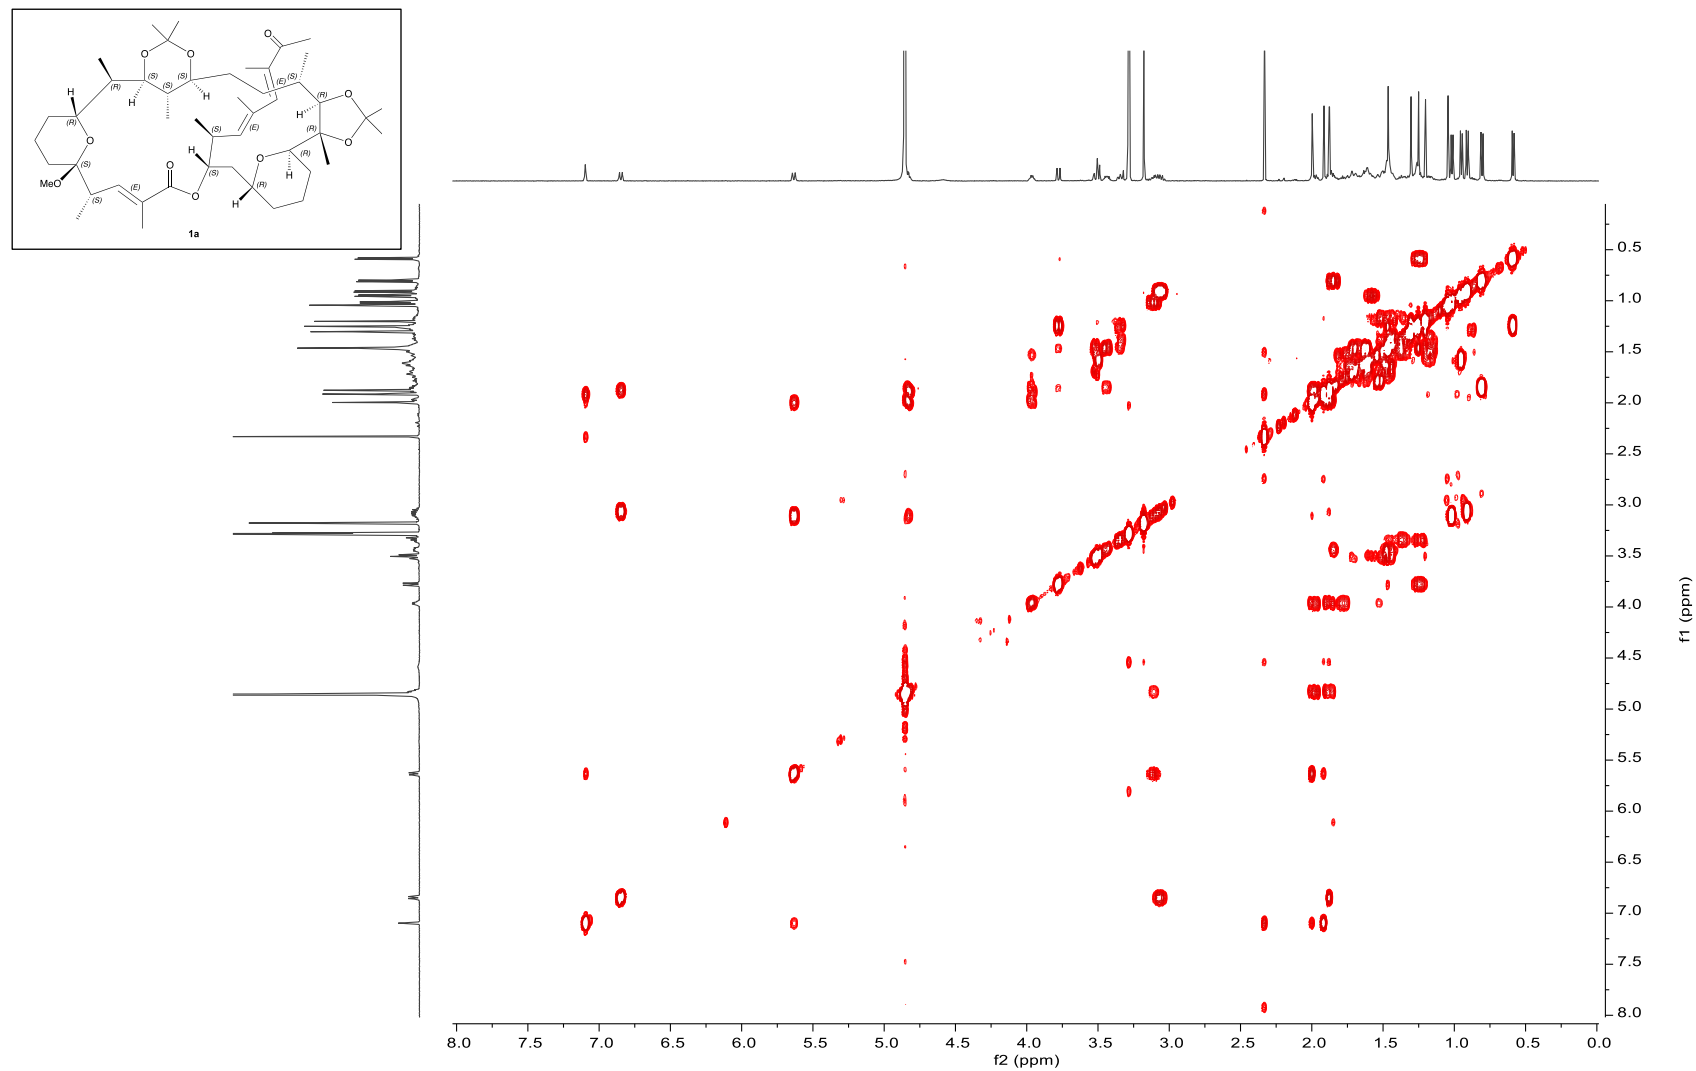

**Figure S29.** COSY NMR spectrum of *bis*-acetonide (**1a**) in benzene-*d*<sub>6</sub>.

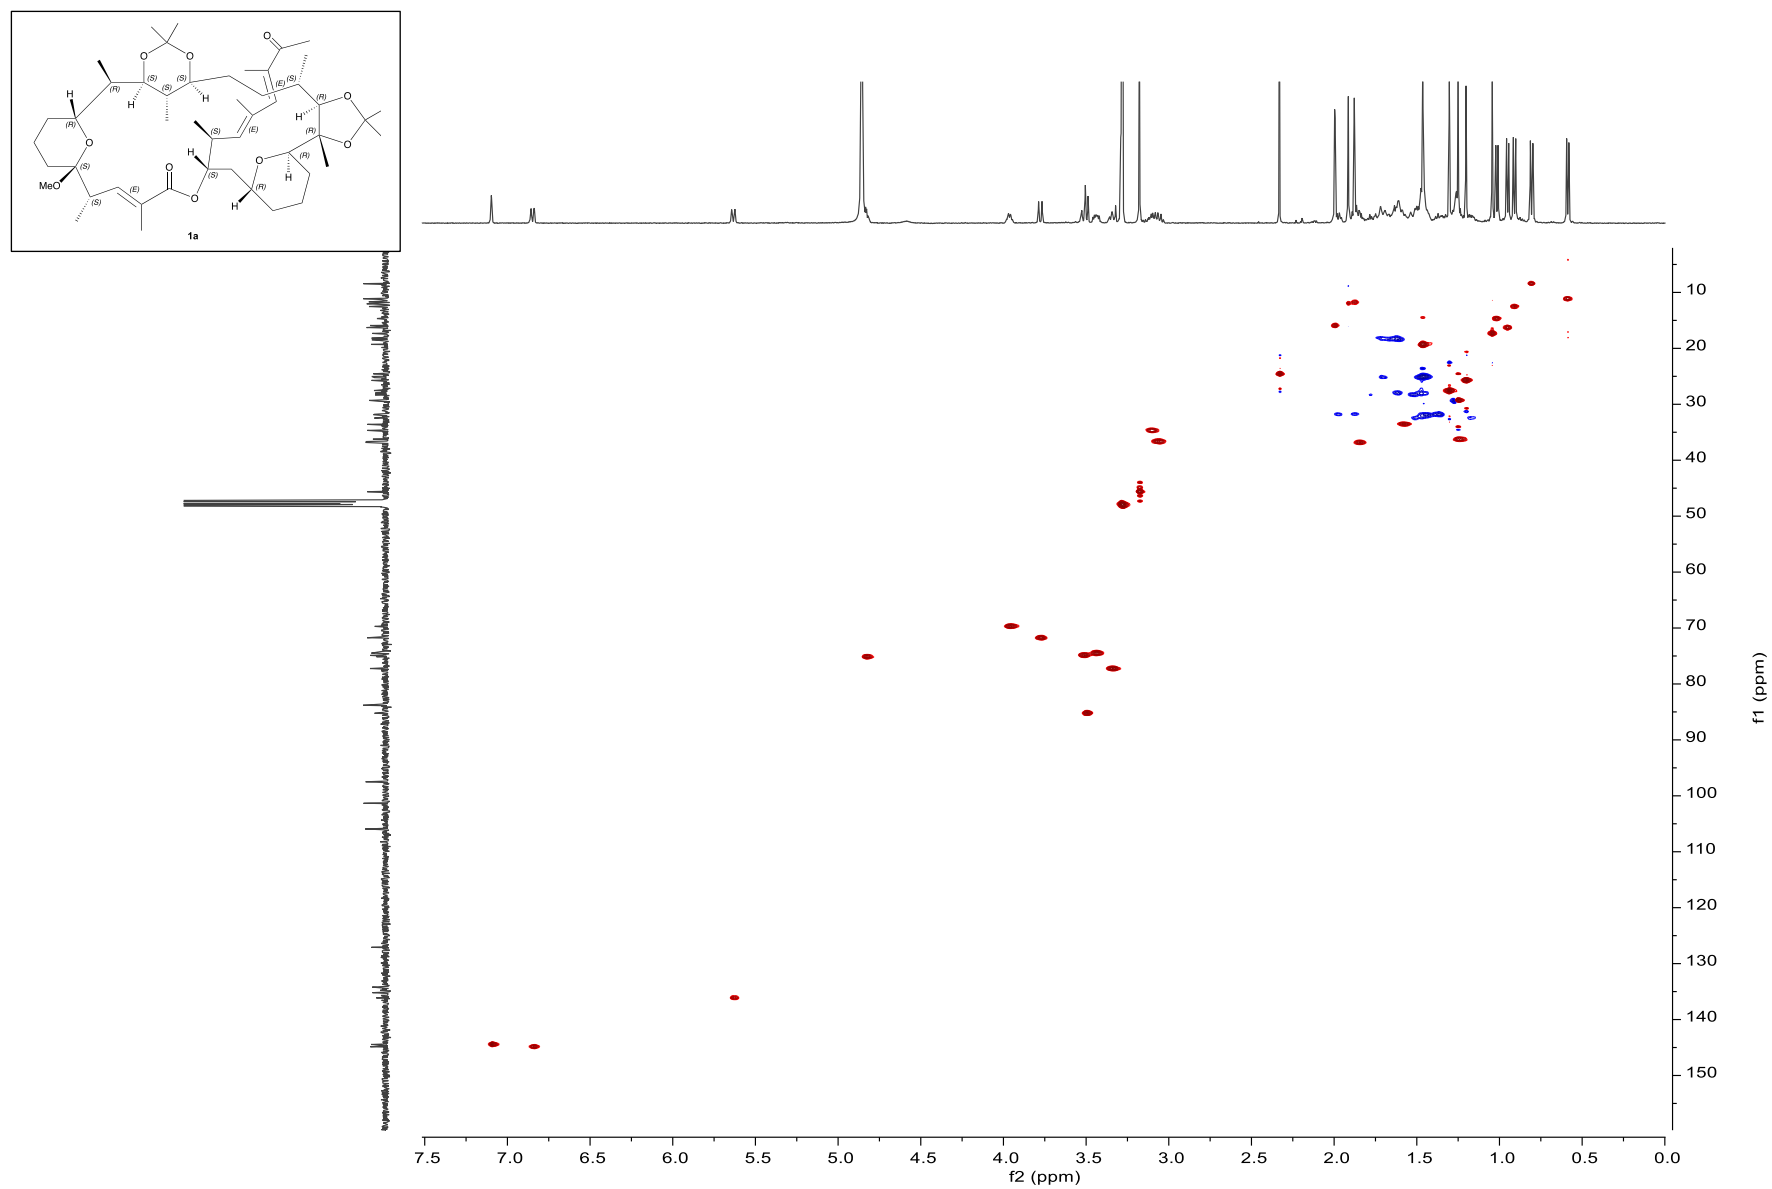

**Figure S30.** HSQC NMR spectrum of bis-acetonide (**1a**) in benzene- $d_6$ .

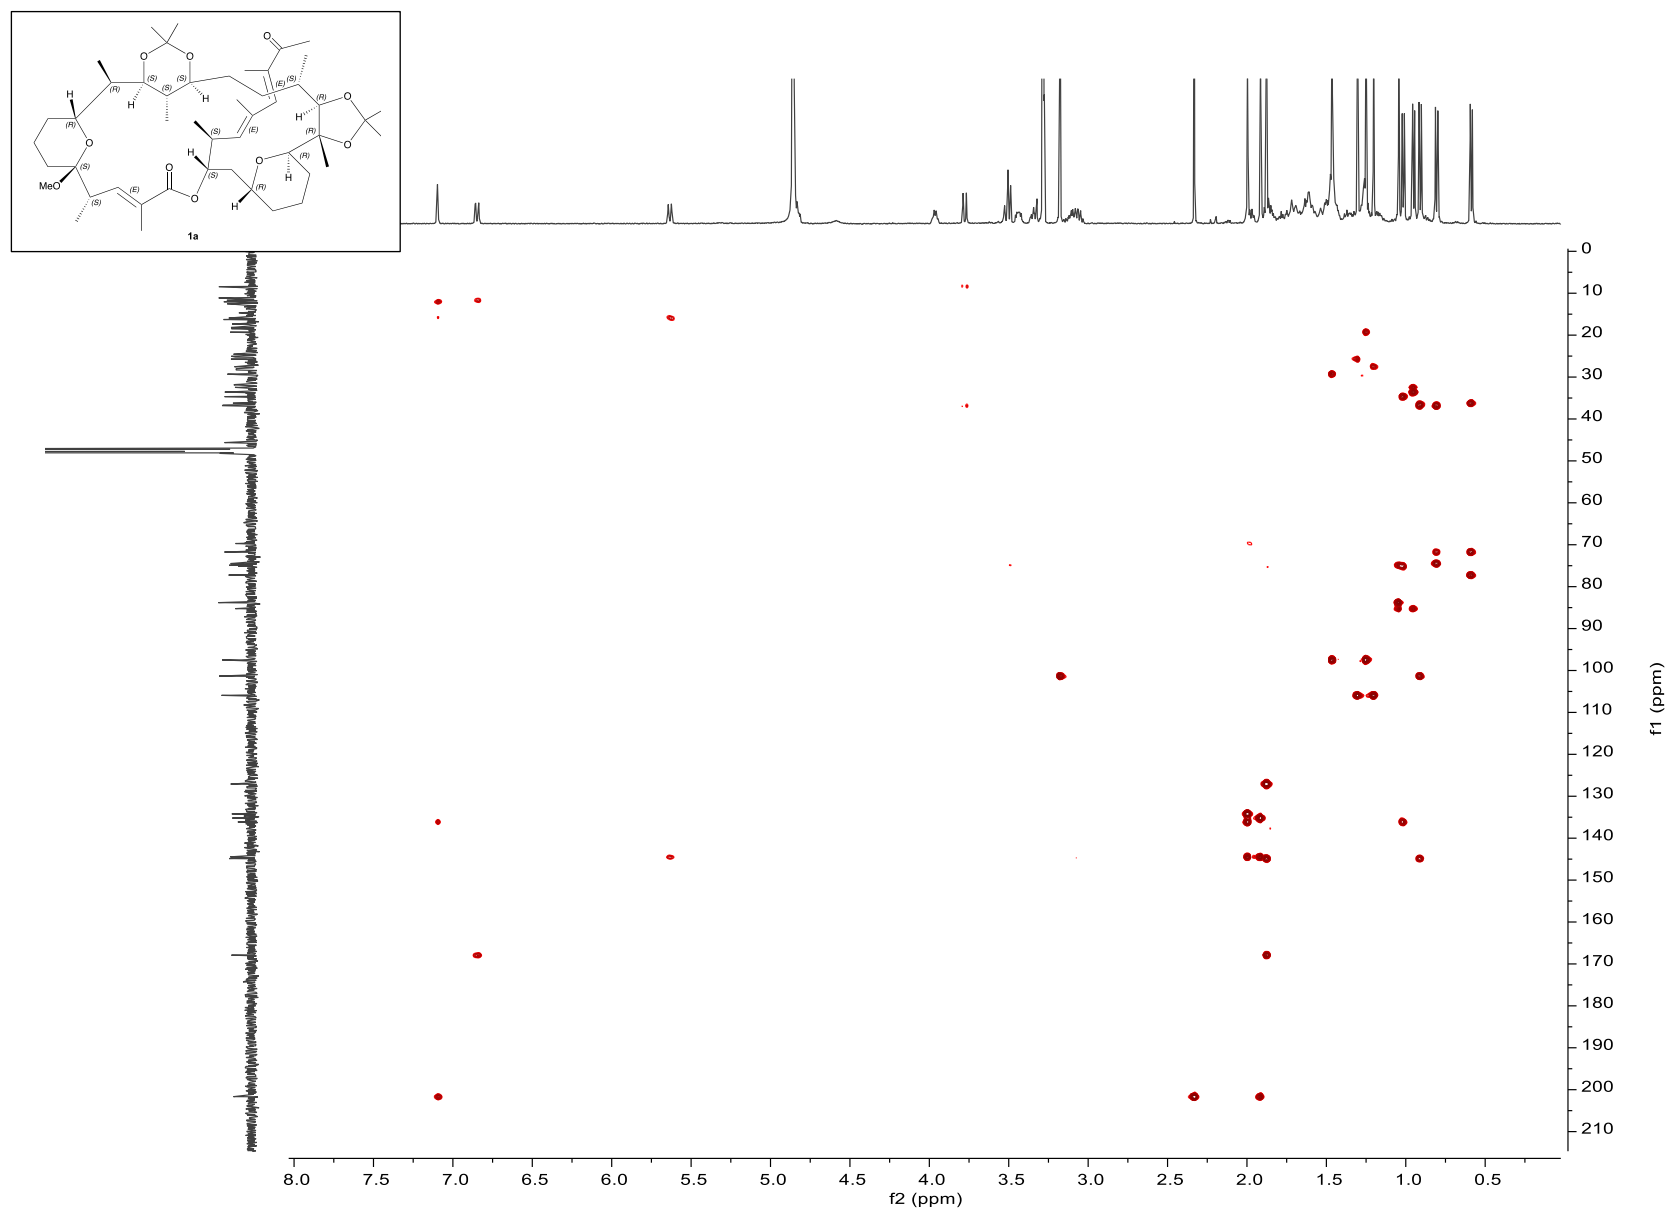

**Figure S31.** HMBC NMR spectrum of bis-acetonide (**1a**) in benzene-*d*<sub>6</sub>

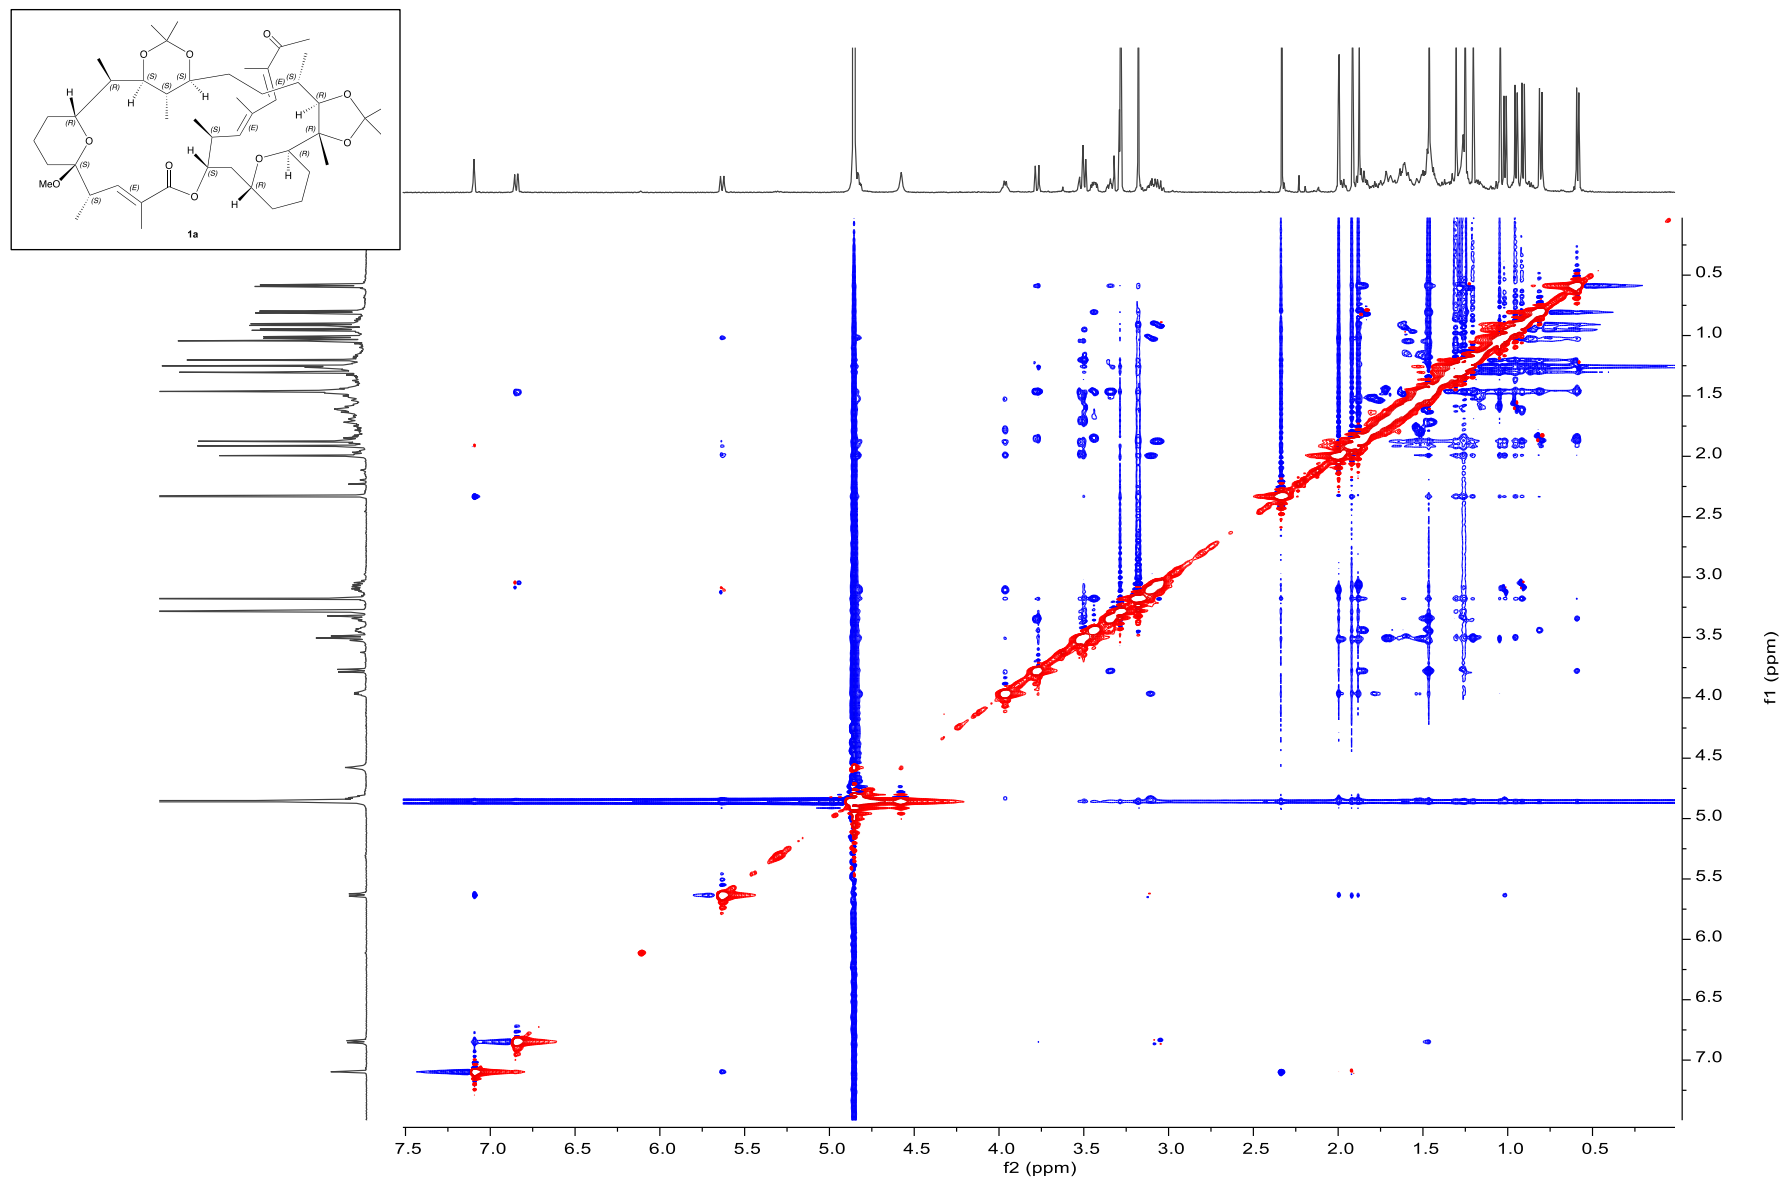

**Figure S32.** ROESY NMR spectrum of *bis*-acetonide (**1a**) in benzene- $d_6$ .

**Table S1.** NMR spectroscopic data for marinolides A (**1**) and B (**2**).

| no. | 1, benzene- <i>d</i> <sub>6</sub> |                                                  | 1, CD <sub>3</sub> OD          |                                                  | 2, benzene- <i>d</i> <sub>6</sub> |                                                  |
|-----|-----------------------------------|--------------------------------------------------|--------------------------------|--------------------------------------------------|-----------------------------------|--------------------------------------------------|
|     | $\delta_C$ , mult <sup>a</sup>    | $\delta_H$ , mult ( <i>J</i> in Hz) <sup>b</sup> | $\delta_C$ , mult <sup>a</sup> | $\delta_H$ , mult ( <i>J</i> in Hz) <sup>b</sup> | $\delta_C$ , mult <sup>a</sup>    | $\delta_H$ , mult ( <i>J</i> in Hz) <sup>b</sup> |
| 1   | 168.7, C                          |                                                  | 168.0, C                       |                                                  | 166.2, C                          |                                                  |
| 2   | 130.6, C                          |                                                  | 128.8, C                       |                                                  | 130.8, C                          |                                                  |
| 3   | 141.9, CH                         | 7.19, m <sup>c</sup>                             | 142.7, CH                      | 6.79, dd (10.5, 1.4)                             | 140.8, CH                         | 6.98, d (10.9)                                   |
| 4   | 44.4, CH                          | 2.53, m <sup>c</sup>                             | 44.8, CH                       | 2.70, m <sup>c</sup>                             | 44.4, CH                          | 2.51, m <sup>c</sup>                             |
| 5   | 99.1, C                           |                                                  | 98.5, C                        |                                                  | 99.4, C                           |                                                  |
| 6   | 33.0, CH <sub>2</sub>             | 1.67, m <sup>c</sup><br>1.01, m <sup>c</sup>     | 33.0, CH <sub>2</sub>          | 1.90, m <sup>c</sup><br>1.37, m <sup>c</sup>     | 32.7, CH <sub>2</sub>             | 1.78, m <sup>c</sup><br>0.93, m <sup>c</sup>     |
| 7   | 19.2, CH <sub>2</sub>             | 1.84, m <sup>c</sup><br>1.45, m <sup>c</sup>     | 18.8, CH <sub>2</sub>          | 1.85, m <sup>c</sup><br>1.67, m <sup>c</sup>     | 19.0, CH <sub>2</sub>             | 1.90, m <sup>c</sup><br>1.42, m <sup>c</sup>     |
| 8   | 28.5, CH <sub>2</sub>             | 1.27, m <sup>c</sup><br>1.06, m <sup>c</sup>     | 28.5, CH <sub>2</sub>          | 1.49, m <sup>c</sup><br>1.09, m <sup>c</sup>     | 28.3, CH <sub>2</sub>             | 1.26, m <sup>c</sup><br>1.01, m <sup>c</sup>     |
| 9   | 77.0, CH                          | 4.10, br d (11.5)                                | 75.8, CH                       | 4.02, m                                          | 76.2, CH                          | 4.16, d (11.7)                                   |
| 10  | 38.1, CH                          | 1.47, m <sup>c</sup>                             | 38.5, CH                       | 1.58, m <sup>c</sup>                             | 37.9, CH                          | 1.35, m <sup>c</sup>                             |
| 11  | 83.5, CH                          | 3.79, br d (9.3)                                 | 79.6, CH                       | 3.58, br d (9.6)                                 | 82.1, CH                          | 3.80, br d (9.2)                                 |
| 12  | 40.5, CH                          | 1.66, m <sup>c</sup>                             | 41.5, CH                       | 1.62, m <sup>c</sup>                             | 40.7, CH                          | 1.41, m <sup>c</sup>                             |
| 13  | 77.8, CH                          | 3.63, m                                          | 73.8, CH                       | 3.70, m                                          | 79.3, CH                          | 3.38, t (9.0)                                    |
| 14  | 32.0, CH <sub>2</sub>             | 1.46, m <sup>c</sup>                             | 30.2, CH <sub>2</sub>          | 1.47, m <sup>c</sup><br>1.29, m <sup>c</sup>     | 35.0, CH <sub>2</sub>             | 1.43, m <sup>c</sup><br>1.23, m <sup>c</sup>     |
| 15  | 27.7, CH <sub>2</sub>             | 1.66, m <sup>c</sup><br>1.35, m <sup>c</sup>     | 28.4, CH <sub>2</sub>          | 1.45, m <sup>c</sup>                             | 29.2, CH <sub>2</sub>             | 1.42, m <sup>c</sup>                             |
| 16  | 36.5, CH                          | 1.71, m <sup>c</sup>                             | 37.4, CH                       | 1.44, m <sup>c</sup>                             | 37.8, CH                          | 1.57, m <sup>c</sup>                             |
| 17  | 83.0, CH                          | 2.85, d (10.3)                                   | 83.0, CH                       | 2.60, d (10.2)                                   | 83.6, CH                          | 2.72, d (9.7)                                    |
| 18  | 63.8, C                           |                                                  | 63.1, C                        |                                                  | 63.5, C                           |                                                  |
| 19  | 63.9, CH                          | 2.91, dd (9.9, 3.1)                              | 63.0, CH                       | 2.79, dd (8.5, 3.4)                              | 62.5, CH                          | 2.90, br d (9.5)                                 |
| 20  | 29.9, CH <sub>2</sub>             | 1.92, m <sup>c</sup><br>1.47, m <sup>c</sup>     | 29.0, CH <sub>2</sub>          | 1.74, m <sup>c</sup><br>1.45, m <sup>c</sup>     | 28.4, CH <sub>2</sub>             | 1.88, m <sup>c</sup><br>1.53, m <sup>c</sup>     |
| 21  | 22.0, CH <sub>2</sub>             | 1.63, m <sup>c</sup>                             | 22.7, CH <sub>2</sub>          | 1.73, m <sup>c</sup><br>1.40, m <sup>c</sup>     | 23.9, CH <sub>2</sub>             | 1.86, m <sup>c</sup><br>1.49, m <sup>c</sup>     |
| 22  | 38.7, CH <sub>2</sub>             | 1.64, m <sup>c</sup>                             | 38.6, CH <sub>2</sub>          | 1.45, m <sup>c</sup><br>1.40, m <sup>c</sup>     | 38.3, CH <sub>2</sub>             | 1.75, m <sup>c</sup><br>1.32, m <sup>c</sup>     |
| 23  | 68.2, CH                          | 3.85, m                                          | 67.0, CH                       | 3.51, m <sup>c</sup>                             | 69.6, CH                          | 3.93, br t (9.5)                                 |

|    |                       |                          |                       |                            |                       |                      |
|----|-----------------------|--------------------------|-----------------------|----------------------------|-----------------------|----------------------|
| 24 | 38.4, CH <sub>2</sub> | 2.15, br dd (13.7, 10.0) | 36.3, CH <sub>2</sub> | 1.75, m <sup>c</sup>       | 38.4, CH <sub>2</sub> | 1.55, m <sup>c</sup> |
|    |                       | 1.94, m <sup>c</sup>     |                       | 1.60, m <sup>c</sup>       |                       | 1.43, m <sup>c</sup> |
| 25 | 76.1, CH              | 5.58, m                  | 72.1, CH              | 5.53, ddd (11.1, 3.3, 2.0) | 65.9, CH              | 4.54, br d (11.2)    |
| 26 | 40.8, CH              | 2.31, m                  | 39.1, CH              | 2.05, m <sup>c</sup>       | 41.3, CH              | 2.42, m              |
| 27 | 77.9, CH              | 4.32, d (8.6)            | 78.9, CH              | 3.78, d (9.3)              | 81.1, CH              | 4.93, d (11.0)       |
| 28 | 139.8, C              |                          | 139.2, C              |                            | 134.9, C              |                      |
| 29 | 126.6, CH             | 5.48, d (9.5)            | 126.8, CH             | 5.22, d (10.0)             | 130.5, CH             | 5.39, br d (10.0)    |
| 30 | 46.3, CH              | 3.18, m                  | 46.2, CH              | 3.48, m <sup>c</sup>       | 46.5, CH              | 2.97, m              |
| 31 | 210.5, C              |                          | 211.4, C              |                            | 206.9, C              |                      |
| 32 | 28.7, CH <sub>3</sub> | 1.86, s                  | 27.0, CH <sub>3</sub> | 2.13, s                    | 27.3 CH <sub>3</sub>  | 1.84, s              |
| 33 | 13.3, CH <sub>3</sub> | 1.99, br s               | 12.1, CH <sub>3</sub> | 1.84, br d (1.0)           | 13.4, CH <sub>3</sub> | 1.95, s              |
| 34 | 14.4, CH <sub>3</sub> | 0.96, d (7.0)            | 13.5, CH <sub>3</sub> | 0.99, m <sup>c</sup>       | 14.5, CH <sub>3</sub> | 1.06, d (6.9)        |
| 35 | 5.1, CH <sub>3</sub>  | 0.88, d (7.0)            | 4.5, CH <sub>3</sub>  | 0.87, d (7.0)              | 4.8, CH <sub>3</sub>  | 0.82, m <sup>c</sup> |
| 36 | 12.6, CH <sub>3</sub> | 0.55, d (6.7)            | 9.9, CH <sub>3</sub>  | 0.72, m <sup>c</sup>       | 12.9, CH <sub>3</sub> | 0.38, d (6.9)        |
| 37 | 16.7, CH <sub>3</sub> | 1.22, d (6.3)            | 15.2, CH <sub>3</sub> | 0.97, m <sup>c</sup>       | 16.1, CH <sub>3</sub> | 1.11, d (6.2)        |
| 38 | 10.8, CH <sub>3</sub> | 1.37, s                  | 9.4, CH <sub>3</sub>  | 1.20, s                    | 10.4, CH <sub>3</sub> | 1.31, s              |
| 39 | 14.4, CH <sub>3</sub> | 0.83, d (7.0)            | 10.7, CH <sub>3</sub> | 0.74, m <sup>c</sup>       | 9.6, CH <sub>3</sub>  | 0.83, m <sup>c</sup> |
| 40 | 11.5, CH <sub>3</sub> | 1.67, br s               | 10.3, CH <sub>3</sub> | 1.68, br d (1.0)           | 11.6, CH <sub>3</sub> | 1.53, s              |
| 41 | 16.7, CH <sub>3</sub> | 1.05, d (6.9)            | 15.3, CH <sub>3</sub> | 1.07, d (6.7)              | 15.8, CH <sub>3</sub> | 0.96, d (6.6)        |

<sup>a</sup>125 MHz. <sup>b</sup>500 MHz. Chemical shifts (δ) in ppm. <sup>c</sup>Overlapping signals.



**Table S2.** 2D COSY and/or TOCSY, HMBC and HSQC-TOCSY NMR data of marinolide A (**1**) (500 MHz, benzene-*d*<sub>6</sub>)

| no. | $\delta_c/\delta_H$ | COSY and/or TOCSY | HMBC                                   | HSQC-TOCSY             |
|-----|---------------------|-------------------|----------------------------------------|------------------------|
| 1   | 168.7/-             |                   |                                        |                        |
| 2   | 130.6/-             |                   |                                        |                        |
| 3   | 141.9/7.19          | H-4, H-33, H-34   | C-1, C-5(w) <sup>a</sup> , C-33        | C-4, C-34              |
| 4   | 44.4/2.53           | H-3, H-34         | C-2, C-3, C-5, C-34                    | C-3, C-34              |
| 5   | 99.1/-              |                   |                                        |                        |
| 6   | 33.0/1.67, 1.01     | H-7               | C-7(w) <sup>a</sup>                    | C-7                    |
| 7   | 19.2/1.84, 1.45     | H-6, H-8          | C-9(w) <sup>a</sup>                    | C-8                    |
| 8   | 28.5/1.27, 1.06     | H-7, H-9          |                                        | C-9                    |
| 9   | 77.0/4.10           | H-7, H-8, H-10    | C-7, C-10(w) <sup>a</sup> , C-11, C-35 | C-7, C-8               |
| 10  | 3.81/1.47           | H-9, H-11, H-35   |                                        | C-9                    |
| 11  | 83.5/3.79           | H-10, H-12, H-36  | C-9, C-12, C-13, C-35                  | C-12, C-13, C-36       |
| 12  | 40.5/1.66           | H-11, H-13, H-36  |                                        | C-13, C-14             |
| 13  | 77.8/3.63           | H-12, H-14, H-36  |                                        | C-11, C-12, C-14, C-36 |
| 14  | 32.0/1.46           | H-13, H-15        |                                        | C-13, C-15             |
| 15  | 27.7/1.66, 1.35     | H-14, H-16        |                                        | C-16                   |
| 16  | 36.5/1.71           | H-15, H-17        |                                        | C-17                   |
| 17  | 83.0/2.85           | H-16, H-37        | C-16, C-18, C-37, C-38                 | C-16, C-37             |
| 18  | 63.8/-              |                   |                                        |                        |
| 19  | 63.9/2.91           | H-20              | C-18, C-20                             | C-20, C-21             |
| 20  | 29.9/1.92, 1.47     | H-19, H21         |                                        | C-19, C-21             |
| 21  | 22.0/1.63           | H-20, H-22        |                                        | C-22, C-23             |
| 22  | 38.7/1.64           | H-21, H-23        |                                        | C-21, C-23             |
| 23  | 68.2/3.98           | H-22, H24         |                                        | C-24, C-25             |
| 24  | 38.4/2.15, 1.94     | H-23, H-25        |                                        | C-23, C-25             |
| 25  | 76.1/5.80           | H-23, H-24, H-26  |                                        | C-23, C-24             |
| 26  | 40.8/2.31           | H-25, H-27, H-39  | C-27                                   | C-27, C-39             |
| 27  | 77.9/4.32           | H-26, H-39        | C-25, C-26, C28, C-29, C-40            | C-26, C-39             |
| 28  | 139.8/-             |                   |                                        |                        |
| 29  | 126.6/5.48          | H-30, H-40, H-41  | C-27, C-30, C-40, C-41(w) <sup>a</sup> | C-30, C-41             |
| 30  | 46.3/3.18           | H-29, H-41        | C-28, C-29, C-31, C-41                 | C-29, C-41             |
| 31  | 210.5/-             |                   |                                        |                        |
| 32  | 28.7/1.86           |                   | C-30, C-31                             |                        |

|    |           |                  |                  |            |
|----|-----------|------------------|------------------|------------|
| 33 | 13.3/1.99 | H-3              | C-1, C-2, C-3    |            |
| 34 | 14.4/0.96 | H-3, H-4         | C-3, C-4, C-5    | C-4        |
| 35 | 5.1/0.88  | H-10             | C-9, C-10, C-11  | C-10       |
| 36 | 12.6/0.55 | H-11, H-12, H-13 | C-11, C-12, C-13 | C-11, C-12 |
| 37 | 16.7/1.22 | H-16, H-17       | C-15, C-16, C-17 | C-16, C-17 |
| 38 | 10.8/1.37 |                  | C-17, C-18, C-19 |            |
| 39 | 14.4/0.83 | H-26, H-27       | C-25, C-26, C-27 | C-26, C-27 |
| 40 | 11.5/1.67 | H-29             | C-27, C-28, C-29 |            |
| 41 | 16.7/1.05 | H-29, H-30       | C-29, C-30, C-31 | C-29, C-30 |

---

<sup>a</sup> 'w' denotes weak signal

**Table S3.** ROESY NMR data for marinolide A (**1**) (500 MHz, benzene-*d*<sub>6</sub>)

| no. | $\delta_c/\delta_H$ | ROESY                      | no. | $\delta_c/\delta_H$ | ROESY                           |
|-----|---------------------|----------------------------|-----|---------------------|---------------------------------|
| 1   | 168.7/-             |                            | 31  | 210.5/-             |                                 |
| 2   | 130.6/-             |                            | 32  | 28.7/1.86           | H-29, H-30                      |
| 3   | 141.9/7.19          | H-9, H-34, H-39(w)         | 33  | 13.3/1.99           | H-4, H-35(w)                    |
| 4   | 44.4/2.53           | H-33                       | 34  | 14.4/0.96           | H-3, H-4, H-6                   |
| 5   | 99.1/-              |                            | 35  | 5.1/0.88            | H-33(w), H-36                   |
| 6   | 33.0/1.67, 1.01     | H-34                       | 36  | 12.6/0.55           | H-11, H-13, H-35                |
| 7   | 19.2/1.84, 1.45     | H-9, H-41                  | 37  | 16.7/1.22           | H-17                            |
| 8   | 28.5/1.27, 1.06     | H-9                        | 38  | 10.8/1.37           | H-16, H-17                      |
| 9   | 77.0/4.10           | H-3, H-7, H-10, H-11, H-41 | 39  | 14.4/0.83           | H-3(w), H-25, H-27              |
| 10  | 3.81/1.47           | H-9, H-11, H-12, H-13      | 40  | 11.5/1.67           | H-23, H-25(w), H-26, H-29, H-30 |
| 11  | 83.5/3.79           | H-9, H-10, H-14, H-36      | 41  | 16.7/1.05           | H-7, H-9                        |
| 12  | 40.5/1.66           | H-10, H-13                 |     |                     |                                 |
| 13  | 77.8/3.63           | H-10, H-12, H-36           |     |                     |                                 |
| 14  | 32.0/1.46           | H-11                       |     |                     |                                 |
| 15  | 27.7/1.66, 1.35     |                            |     |                     |                                 |
| 16  | 36.5/1.71           | H-38                       |     |                     |                                 |
| 17  | 83.0/2.85           | H-19, H-37, H-38           |     |                     |                                 |
| 18  | 63.8/-              |                            |     |                     |                                 |
| 19  | 63.9/2.91           | H-17                       |     |                     |                                 |
| 20  | 29.9/1.92, 1.47     |                            |     |                     |                                 |
| 21  | 22.0/1.63           |                            |     |                     |                                 |
| 22  | 38.7/1.64           |                            |     |                     |                                 |
| 23  | 68.2/3.98           | H-25, H-26, H-40           |     |                     |                                 |
| 24  | 38.4/2.15, 1.94     |                            |     |                     |                                 |
| 25  | 76.1/5.80           | H-23, H-39, H-40(w)        |     |                     |                                 |
| 26  | 40.8/2.31           | H-23, H-40                 |     |                     |                                 |
| 27  | 77.9/4.32           | H-39                       |     |                     |                                 |
| 28  | 139.8/-             |                            |     |                     |                                 |
| 29  | 126.6/5.48          | H-30, H-32, H-41           |     |                     |                                 |
| 30  | 46.3/3.18           | H-29, H-32, H-40           |     |                     |                                 |

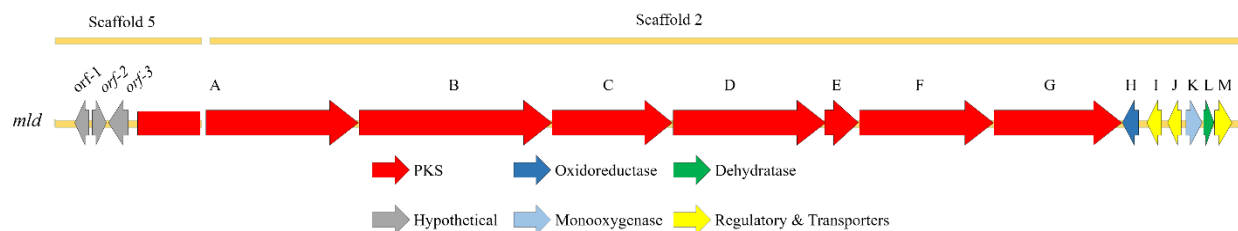

**Figure S33.** Organization of the marinolide *mld* biosynthetic cluster in actinomycete AJS-327. The polyketide synthase MldA is split across scaffolds 2 and 5. The gap could not be closed with PacBio sequencing, Illumina sequencing, or by PCR.

**Table S4.** Annotation of the open reading frames in the *mld* biosynthetic cluster, GenBank accession number OL257848

| Gene Product | Amino Acid (number) | Proposed function                       | Sequence similarity (origin)         | Similarity/identity (%) | Accession number |
|--------------|---------------------|-----------------------------------------|--------------------------------------|-------------------------|------------------|
| Orf(-1)      | 394                 | Hypothetical                            | <i>Streptomyces</i> sp. HNM0575      | 86/76                   | WP_169134176     |
| Orf(-2)      | 384                 | Cystathionine gamma synthase            | <i>Streptomyces boluensis</i>        | 92/87                   | WP_161700726     |
| Orf(-3)      | 557                 | Protein kinase                          | <i>Nonomuraea cypriaca</i>           | 81/67                   | WP_195895185     |
| MldA         |                     | Polyketide synthase                     | N/A                                  | N/A                     | N/A              |
| MldB         | 5413                | Polyketide synthase                     | N/A                                  | N/A                     | N/A              |
| MldC         | 3403                | Polyketide synthase                     | N/A                                  | N/A                     | N/A              |
| MldD         | 4285                | Polyketide synthase                     | N/A                                  | N/A                     | N/A              |
| MldE         | 952                 | Polyketide synthase                     | N/A                                  | N/A                     | N/A              |
| MldF         | 3789                | Polyketide synthase                     | N/A                                  | N/A                     | N/A              |
| MldG         | 3600                | Polyketide synthase                     | N/A                                  | N/A                     | N/A              |
| MldH         | 452                 | FAD-Dependent oxidoreductase            | <i>Streptomyces camponoticapitis</i> | 73/63                   | WP_189106772     |
| MldI         | 409                 | TerC metal homeostasis membrane protein | <i>Mycolicibacterium</i> sp. S18     | 86/73                   | WP_197375429     |
| MldJ         | 380                 | Helix-turn-helix domain protein         | <i>Streptomyces</i> sp. CRXT-Y-14    | 80/77                   | WP_188340716     |
| MldK         | 448                 | Flavin monooxygenase                    | <i>Streptomyces</i> sp. CRXT-Y-14    | 88/84                   | WP_188340717     |
| MldL         | 281                 | Short chain dehydrogenase               | <i>Streptomyces palmae</i>           | 90/85                   | WP_135342123     |
| MldM         | 483                 | MFS transporter                         | <i>Streptomyces</i> sp. CRXT-Y-14    | 88/83                   | WP_188341737     |

| <u>Malonyl-CoA</u>           |         | 75 | 106    | 203  |
|------------------------------|---------|----|--------|------|
| Mld Loading                  | DDTAYAQ |    | GHSLGE | HAFH |
| Mld Mod4                     | GETVFAQ |    | GHSVGE | HAFH |
| Mld Mod5                     | DQTHYTQ |    | GHSVGE | HAFH |
| Mld Mod6                     | GETVFAQ |    | GHSVGE | HAFH |
| Mld Mod9                     | GETVFAQ |    | GHSVGE | HAFH |
| Mld Mod12                    | GETVFAQ |    | GHSVGE | HAFH |
| Mld Mod13                    | GETVFAQ |    | GHSVGE | HAFH |
| <br><u>Methylmalonyl-CoA</u> |         |    |        |      |
| Mld Mod1*                    | -----   |    | GAPTLE | YASH |
| Mld Mod2                     | GRVDVVQ |    | GHSQGE | YASH |
| Mld Mod3                     | GRVDVVQ |    | GHSQGE | YASH |
| Mld Mod7                     | DRVDVVQ |    | GHSQGE | YASH |
| Mld Mod8                     | GRVDVVQ |    | GHSQGE | YASH |
| Mld Mod10                    | GRVDVVQ |    | GHSQGE | YASH |
| Mld Mod11*                   | -----VQ |    | GHSQGE | YASH |
| Mld Mod14                    | GRVDVVQ |    | GHSQGE | YASH |
| Mld Mod15                    | DRVDVVQ |    | GHSQGE | YASH |

**Figure S34.** Sequence alignment of key residues for malonyl-CoA and methylmalonyl-CoA selecting acyltransferase (AT) domains in the *mld* polyketide synthases. The marinolide loading domain, module 4, module 5, module 6, module 9, module 12 and module 13 contain the “HAFH” motif indicating the preference for malonyl-CoA, whereas module 1, module 2, module 3, module 7, module 8, module 10, module 11, module 14 and module 15 contain the “YASH” motif indicating a preference for methyl-malonyl-CoA.<sup>1</sup> The asterisk on modules 1 and 11 indicate partial AT domain sequences as the genome around these respective areas could not be closed using PacBio, Illumina, or Sanger sequencing of PCR products.

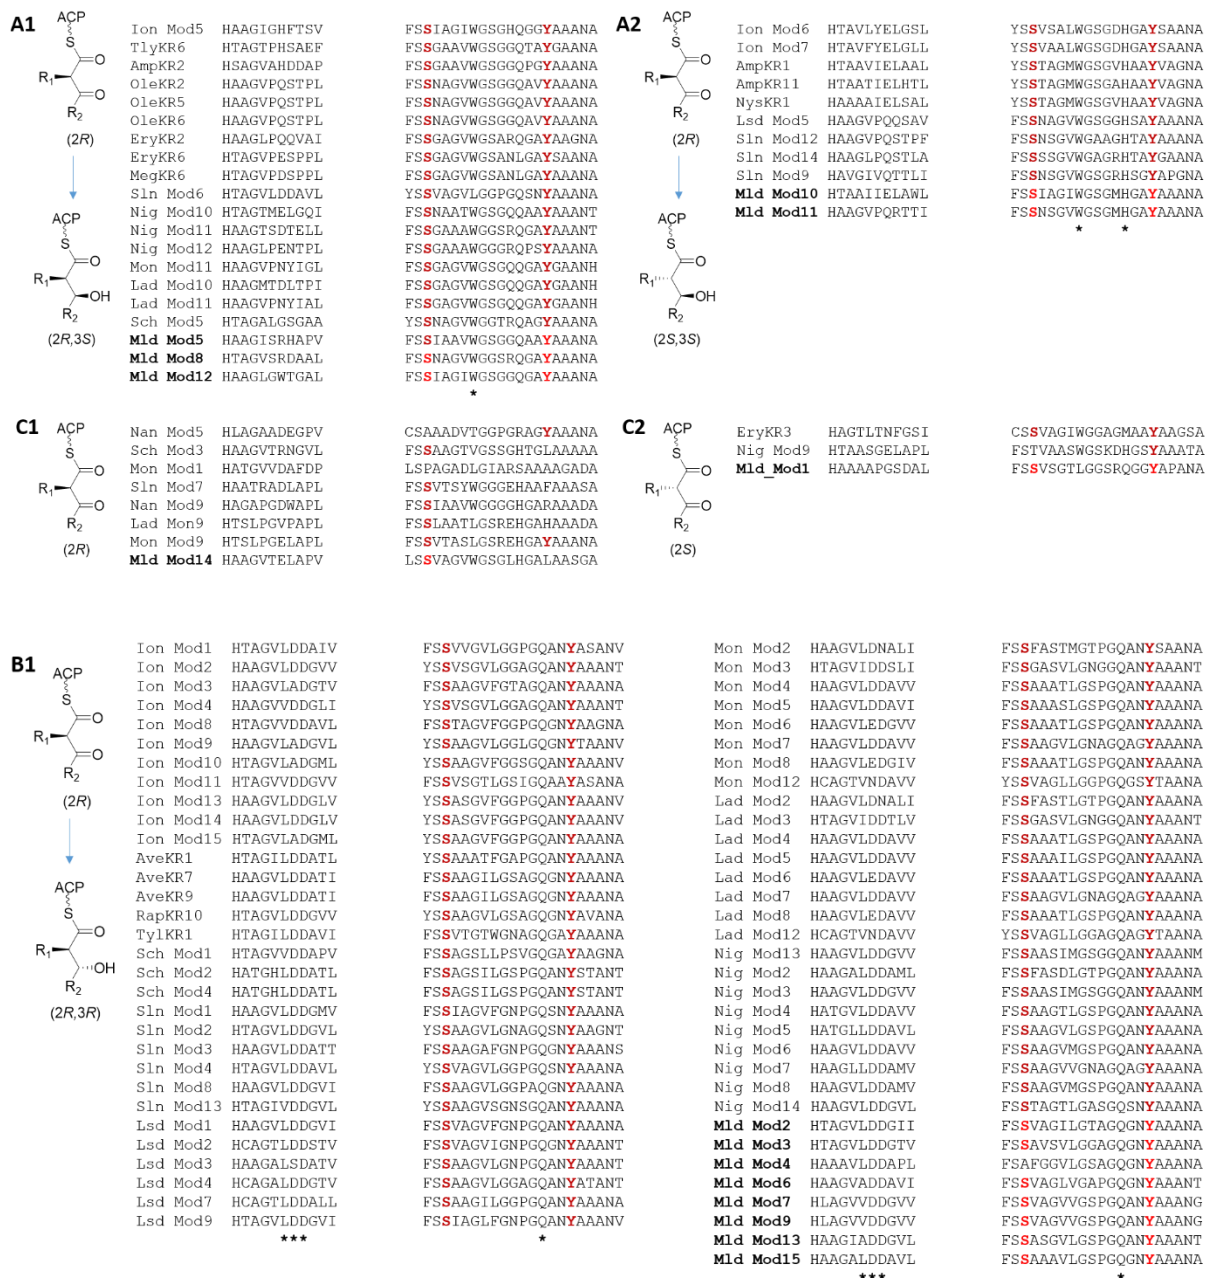

**Figure S35.** Sequence alignment of key residues for A1, A2, B1, B2, and redox-inactive C1 and C2 ketoreductase domains.<sup>2</sup> Abbreviations: ACP = acyl carrier protein domain; Amp = amphotericin; Ave = avermectin; Ery = erythromycin; Ion = ionostatin; Lsd = lasalocid; Lad = laidlomycin; Meg = megalomycin; Mld = marinolide; Mon = monensin; Nan = nanchangmycin; Nig = nigericin; Nys = nystatin; Ole = oleandomycin; Pik = pikromycin; Rap = rapamycin; Sln = salinomycin; Sch = calcimycin; and Tyl = tylosin. Active site tyrosine and serine residues are highlighted in red. Signature residues for the A and B classes are marked with an asterisk.

|           |                    |              |          |           |
|-----------|--------------------|--------------|----------|-----------|
| Mld Mod2  | WLTEHQVNGRTILPGTAV | AANGYHHGPRFR | VLLDAALQ | RLPFVWTDV |
| Mld Mod3  | WLREHTRDGTVVVPSSAV | IECGAAGENVHD | DLMHALLR | RMATQWREV |
| Mld Mod6  | WLVDHGVGGVVVPGTAF  | AGGGFDYGPVFR | ALLDAVLH | GMPFAFSGV |
| Mld Mod7  | WLADHRILDAVLVPGTAL | TGIGFHYGDGFR | ALLDSALH | RLPFSWGEV |
| Mld Mod9  | WLVDHGVGGVVVPGTAF  | AGGGFDYGPVFR | ALLDAVLH | GMPFAFSGV |
| Mld Mod13 | WLVDHGVGGVVVPGTAF  | AGGGFDYGPVFR | ALLDAVLH | GMPFAFSGV |
| Mld Mod15 | WLTDHQVSGVTLLPGTAF | AALGYGYGPAFR | ALLDAGVQ | RLPFAWTGL |
|           | # * *              | ** *** *     | # *      | *** *     |
|           | HxxxGxxxxP         | GYxYGPxF     | DxxxQ/H  | LPFxW     |
|           | motif              | motif        | motif    | motif     |

**Figure S36.** Sequence alignment of key residues for dehydratase domains in the marinolide (*mld*) polyketide synthases. DH motifs are shown<sup>3</sup> and based on conserved residues, modules 2, 6, 7, 9, 13, and 15 are predicted to be active. Module 3 is missing the catalytic aspartic acid residue and is predicted to be inactive. Catalytic histidine and aspartic acid residues are marked with #, whereas conserved residues are indicated by an asterisk.

Mld Mod6:       FRDVMVALGMY**Y**PGR  
Mld Mod9:       FRDVLIALGMY**Y**PDD  
Mld Mod13:      FRDVLIALGMY**Y**PGA

**Figure S37.** Sequence alignment of key residues for enoyl reductase domains in the marinolide (*mld*) polyketide synthases. Modules 6, 9 and 13 in the *mld* cluster contain ER domains. For all three modules, Y44 (highlighted in red) is present indicating a 2*S*-2-methyl-acyl product.<sup>4</sup> However, the AT prediction for each of the three modules indicates a preference for malonyl-CoA so there should be no ER-catalyzed epimerization activity on a 2-methyl-2,3-enoylacyl intermediate.

|           |       |                        |                       |                  |            |          |           |  |     |  |     |  |     |
|-----------|-------|------------------------|-----------------------|------------------|------------|----------|-----------|--|-----|--|-----|--|-----|
|           |       |                        | 160                   |                  | 185        |          | 245       |  | 270 |  | 380 |  | 450 |
| Mld Mod1  | (A1): | PTTLHGSQTGVFLGATSQDYG  | APVGYEGYVLTGSTASVASGR | VTVMATPGMFVEFSKQ | ADGTGWSEGA | KSNIGHTQ | FGISGTNA  |  |     |  |     |  |     |
| Mld Mod2  | (D1): | PEALRGSQTGTIYGLTYQDYA  | ISQLEGYLITGGNASVASGR  | ATVMSSPTTFLDFCRQ | ADGFGPGEGV | KSNIGHTQ | FGVSGTNA  |  |     |  |     |  |     |
| Mld Mod3  | (L6): | AGMLRGSRTGVFAGLMYHEYG  | APGEVEGYLANGSAGSVASGR | STVMTSPMLFTELSRQ | ADGFGPGEGV | KSNIGHTQ | FGVSGTNA  |  |     |  |     |  |     |
| Mld Mod4  | (I5): | PTGLTGRRIGVFVGLNGQDYA  | VPEEVEGYLGIGTAASVVSGR | ATVMSAPDTFVEFSRQ | ADGTGWGEGV | KSNIGHTQ | FGVSGTNA  |  |     |  |     |  |     |
| Mld Mod5  | (F5): | PSTLRGSRTGVFAGTNGQDYA  | VPDG-EDFAATGNAASVLSGR | VTVMSTPAAFVGFGRQ | ADGTAWGEGV | KSNIGHTQ | FGVSGTNA  |  |     |  |     |  |     |
| Mld Mod6  | (E2): | PESLRTSPTGVFVGTSVHDYV  | AGGAAEGHLATGNAASVVSGR | ATVMSTPGAFIEFSRQ | ADGTGWGEGV | KSNIGHTQ | FGVSGTNA  |  |     |  |     |  |     |
| Mld Mod7  | (N2): | PTSLRGGKVGVSGLIGQGYA   | IPPDVEGYIGTGNASVASGR  | VTVMSTPDTFVEFSRQ | ADGTGWAEGA | KSNIGHTQ | FGVSGTNA  |  |     |  |     |  |     |
| Mld Mod8  | (L2): | VLGLRGSRTGVFVGVIQDYA   | VPEEAAGYVGIGNTTSVVSGR | VTVMSSAATFVEFGRQ | ADGTGWGEGV | KSNIGHTQ | FGVSGTNA  |  |     |  |     |  |     |
| Mld Mod9  | (G4): | ANTLRNTNTGVFVGASAQSYG  | AGEGEGGYFLTGNAASVVSGR | VAVMSNPGAFVEFSRQ | ADGTGWGEGV | KSNIGHTQ | FGVSGTNA  |  |     |  |     |  |     |
| Mld Mod10 | (N5): | VLGLRGSRTGVFVGVIQDYA   | VPEEAAGYVGIGNTTSVVSGR | VTVMSSAATFVEFGRQ | ADGTGWGEGV | KSNIGHTQ | FGVSGTNA  |  |     |  |     |  |     |
| Mld Mod11 | (H3): | PELLRGSATGVFVGSNYQDYG  | APEGAEGHMLTGGASSVLSGR | VAVMGSPGALVAFSKQ | ADGMGMAEGV | KSNIGHTQ | FGVSGTNA  |  |     |  |     |  |     |
| Mld Mod12 | (H7): | LTAHGSSTGVFVGAGFQGY-   | TADTSDGYFLTGSTGSVVSGR | VTVMSTPGAFVEFSRQ | ADGTGWGEGV | KSNIGHTQ | FGVSGTNA  |  |     |  |     |  |     |
| Mld Mod13 | (E6): | PESLRTSPTGVFVGTTNGQDYV | AGIAAEGYLATGNAASVVSGR | VTVMSTPGAFVEFSRQ | ADGTGWGEGV | KSNIGHTQ | FGVSGTNA  |  |     |  |     |  |     |
| Mld Mod14 | (N2): | PLSVAGRPFVGTSTSGYG     | APPGVEGYLLTGSAASVASGR | ATVMSSPGTFVEFSRQ | ADGTGWGEGV | KSNIGHTQ | FGVSGTNA  |  |     |  |     |  |     |
| Mld Mod15 | (C1): | PQEVGRSDTGVFVGTTNGQDYA | AGDGMGYLGTGNAASVVSGR  | VTVMSTPGSLLTFARQ | ADGMGMAEGV | KSNIGHTQ | FGMSTGTNA |  |     |  |     |  |     |
|           |       | *****                  | *****                 | ***              | *****      | ****     | *         |  |     |  |     |  |     |

**Figure S38.** Sequence alignment of select regions for ketosynthase domains in the marinolide (*mld*) polyketide synthases. The selected regions correspond to substrate tunnels identified by the Keatinge-Clay lab, and the 32 asterisks indicate residues that are predicted to be involved in selecting the polyketide substrate, in particular the chemistry at the alpha, beta and gamma positions.<sup>5</sup> Based on the type of substrate they accept, the KS domains from the *mld* PKSs were separated into groups where the KS in module1 is an acetyl acceptor and belongs to group A1, the KS in module 2 belongs to group D1 and is an L-alpha-methyl-beta-ketoacyl acceptor, the KS domains in modules 3 and 8 are trans-alpha/beta-enoyl acceptors and belong to groups L6 and L2, respectively, the KS in module 4 belongs to the I5 group and is a D-alpha-methyl-D-beta-hydroxy acceptor, the KS domain in module 5 is an alpha-unsubstituted-D-beta-hydroxy acceptor and belongs to group F5, the KS domains in modules 6 and 13 belong to groups E2 and E6, respectively, and are alpha-unsubstituted-L-beta-hydroxy acceptors, the KS domains in modules 7 and 14 belong to group N2 and are alpha-unsubstituted-beta-methylene acceptors, the KS in module 9 belongs to group G4 and is a D-alpha-methyl-L-beta-hydroxy acceptor, the KS in module 10 is an alpha-unsubstituted-beta-methylene-gamma-methyl acceptor and belongs to group N5, the KS domains in modules 11 and 12 are L-alpha-methyl-L-beta-hydroxy acceptors and belong to groups H3 and H7, respectively, and the KS in module 15 belongs to group C1 and is a D-alpha-methyl-beta-ketoacyl acceptor.



**Table S5.** Crystal data and structure refinement for **1a**.

|                                   |                                                 |                  |
|-----------------------------------|-------------------------------------------------|------------------|
| Identification code               | fenical001_0m_a_sq                              |                  |
| Empirical formula                 | C <sub>48</sub> H <sub>78</sub> O <sub>10</sub> |                  |
| Formula weight                    | 815.10                                          |                  |
| Temperature                       | 100.0 K                                         |                  |
| Wavelength                        | 1.54178 Å                                       |                  |
| Crystal system                    | Monoclinic                                      |                  |
| Space group                       | P 1 21 1                                        |                  |
| Unit cell dimensions              | a = 13.3950(3) Å                                | α = 90°.         |
|                                   | b = 11.0249(3) Å                                | β = 100.339(2)°. |
|                                   | c = 33.7472(10) Å                               | γ = 90°.         |
| Volume                            | 4902.8(2) Å <sup>3</sup>                        |                  |
| Z                                 | 4                                               |                  |
| Density (calculated)              | 1.104 Mg/m <sup>3</sup>                         |                  |
| Absorption coefficient            | 0.604 mm <sup>-1</sup>                          |                  |
| F(000)                            | 1784                                            |                  |
| Crystal size                      | 0.18 x 0.14 x 0.12 mm <sup>3</sup>              |                  |
| Theta range for data collection   | 1.331 to 70.094°.                               |                  |
| Index ranges                      | -16 ≤ h ≤ 16, -13 ≤ k ≤ 13, -41 ≤ l ≤ 41        |                  |
| Reflections collected             | 92643                                           |                  |
| Independent reflections           | 18579 [R(int) = 0.0489]                         |                  |
| Completeness to theta = 67.679°   | 100.0 %                                         |                  |
| Absorption correction             | Semi-empirical from equivalents                 |                  |
| Max. and min. transmission        | 0.6617 and 0.5766                               |                  |
| Refinement method                 | Full-matrix least-squares on F <sup>2</sup>     |                  |
| Data / restraints / parameters    | 18579 / 82 / 1180                               |                  |
| Goodness-of-fit on F <sup>2</sup> | 1.015                                           |                  |
| Final R indices [I > 2σ(I)]       | R1 = 0.0378, wR2 = 0.0861                       |                  |
| R indices (all data)              | R1 = 0.0456, wR2 = 0.0899                       |                  |
| Absolute structure parameter      | 0.06(5)                                         |                  |
| Extinction coefficient            | n/a                                             |                  |
| Largest diff. peak and hole       | 0.291 and -0.201 e.Å <sup>-3</sup>              |                  |

**Table S6.** Atomic coordinates ( $\times 10^4$ ) and equivalent isotropic displacement parameters ( $\text{\AA}^2 \times 10^3$ ) for **1a**. U(eq) is defined as one third of the trace of the orthogonalized  $U_{ij}$  tensor.

|        | x        | y       | z       | U(eq) |
|--------|----------|---------|---------|-------|
| C(1A)  | 4866(4)  | 1671(4) | 4141(2) | 89(2) |
| C(2A)  | 5426(2)  | 959(3)  | 3866(1) | 44(1) |
| C(3A)  | 5998(2)  | 1609(3) | 3594(1) | 42(1) |
| C(4A)  | 6545(4)  | 777(4)  | 3350(2) | 86(2) |
| C(5A)  | 5998(2)  | 2831(3) | 3586(1) | 40(1) |
| C(6A)  | 6543(2)  | 3696(3) | 3376(1) | 38(1) |
| C(7A)  | 7438(3)  | 3295(3) | 3193(1) | 50(1) |
| C(8A)  | 6254(2)  | 4869(3) | 3370(1) | 36(1) |
| C(9A)  | 6748(2)  | 5920(3) | 3198(1) | 32(1) |
| C(10A) | 5992(2)  | 6893(3) | 3018(1) | 41(1) |
| C(11A) | 7590(2)  | 6416(2) | 3532(1) | 28(1) |
| C(12A) | 7208(2)  | 7127(3) | 3858(1) | 33(1) |
| C(13A) | 8048(2)  | 7389(3) | 4221(1) | 36(1) |
| C(14A) | 7895(2)  | 8558(3) | 4440(1) | 40(1) |
| C(15A) | 7046(2)  | 8426(3) | 4684(1) | 38(1) |
| C(16A) | 7282(2)  | 7355(3) | 4970(1) | 36(1) |
| C(17A) | 7436(2)  | 6204(3) | 4736(1) | 32(1) |
| C(35A) | 12822(2) | 5628(2) | 3814(1) | 29(1) |
| C(36A) | 13767(2) | 5079(3) | 4073(1) | 39(1) |
| C(37A) | 13023(2) | 5993(2) | 3396(1) | 29(1) |
| C(38A) | 13046(2) | 4965(3) | 3097(1) | 36(1) |
| C(39A) | 13134(2) | 5481(3) | 2685(1) | 41(1) |
| C(40A) | 12266(2) | 6370(3) | 2546(1) | 39(1) |
| C(41A) | 12220(2) | 7342(3) | 2859(1) | 32(1) |
| C(42A) | 13326(3) | 8959(3) | 3158(1) | 66(1) |
| C(43A) | 11037(2) | 8652(4) | 2354(1) | 55(1) |
| C(44A) | 11252(2) | 8130(3) | 2782(1) | 36(1) |
| C(45A) | 10369(2) | 7418(2) | 2875(1) | 31(1) |

|        |           |          |          |       |
|--------|-----------|----------|----------|-------|
| C(46A) | 9695(2)   | 7751(2)  | 3097(1)  | 27(1) |
| C(47A) | 9656(2)   | 8964(3)  | 3295(1)  | 38(1) |
| C(48A) | 8964(2)   | 6803(2)  | 3178(1)  | 28(1) |
| O(1A)  | 5445(2)   | -151(2)  | 3883(1)  | 54(1) |
| O(2A)  | 8208(1)   | 6376(2)  | 4497(1)  | 36(1) |
| O(7A)  | 12224(1)  | 6833(2)  | 3246(1)  | 27(1) |
| O(8A)  | 13110(2)  | 8046(2)  | 2857(1)  | 46(1) |
| O(9A)  | 9016(2)   | 5736(2)  | 3101(1)  | 39(1) |
| O(10A) | 8243(1)   | 7270(2)  | 3366(1)  | 28(1) |
| C(18A) | 7675(6)   | 5080(10) | 5009(4)  | 30(1) |
| C(19A) | 8713(5)   | 5234(15) | 5281(4)  | 41(2) |
| C(20A) | 6397(5)   | 3914(6)  | 5225(2)  | 38(2) |
| C(21A) | 5376(4)   | 4078(7)  | 4957(2)  | 58(2) |
| C(22A) | 6307(4)   | 3432(5)  | 5634(2)  | 46(1) |
| C(23A) | 7518(5)   | 3836(7)  | 4786(2)  | 35(2) |
| C(24A) | 8424(9)   | 3059(9)  | 4717(5)  | 33(1) |
| C(25A) | 8119(5)   | 1725(6)  | 4623(2)  | 46(1) |
| C(26A) | 8924(3)   | 3589(5)  | 4375(1)  | 41(1) |
| C(27A) | 9879(3)   | 4084(4)  | 4473(1)  | 31(1) |
| C(28A) | 10454(3)  | 4144(4)  | 4124(1)  | 27(1) |
| C(29A) | 11352(4)  | 2784(4)  | 3756(1)  | 28(1) |
| C(30A) | 11868(4)  | 1559(4)  | 3812(1)  | 36(1) |
| C(31A) | 10619(4)  | 2843(5)  | 3356(1)  | 34(1) |
| C(32A) | 11853(10) | 4900(6)  | 3802(4)  | 23(1) |
| C(33A) | 11319(7)  | 5059(5)  | 4166(3)  | 29(1) |
| C(34A) | 10918(7)  | 6360(5)  | 4180(3)  | 42(1) |
| O(3A)  | 6926(3)   | 5050(6)  | 5272(2)  | 32(1) |
| O(4A)  | 7021(2)   | 3112(3)  | 5051(1)  | 35(1) |
| O(5A)  | 10839(3)  | 2939(3)  | 4085(1)  | 28(1) |
| O(6A)  | 12145(4)  | 3652(5)  | 3772(2)  | 26(1) |
| C(18B) | 7893(17)  | 5110(20) | 4993(9)  | 30(1) |
| C(19B) | 8953(15)  | 5200(40) | 5240(10) | 41(2) |
| C(20B) | 6413(12)  | 4092(17) | 5101(4)  | 38(2) |

|        |           |          |          |       |
|--------|-----------|----------|----------|-------|
| C(21B) | 5375(11)  | 4711(16) | 5012(5)  | 58(2) |
| C(22B) | 6446(8)   | 3073(10) | 5395(3)  | 46(1) |
| C(23B) | 7696(13)  | 3977(19) | 4704(6)  | 35(2) |
| C(24B) | 8450(20)  | 2940(20) | 4757(11) | 33(1) |
| C(25B) | 7864(14)  | 1729(17) | 4723(5)  | 46(1) |
| C(26B) | 9140(7)   | 2954(12) | 4443(3)  | 41(1) |
| C(27B) | 10090(7)  | 3454(10) | 4439(3)  | 31(1) |
| C(28B) | 10607(9)  | 3673(13) | 4083(3)  | 27(1) |
| C(29B) | 11630(9)  | 2520(11) | 3691(4)  | 28(1) |
| C(30B) | 12267(9)  | 1394(10) | 3734(3)  | 36(1) |
| C(31B) | 10909(9)  | 2571(13) | 3283(3)  | 34(1) |
| C(32B) | 11940(20) | 4660(19) | 3771(9)  | 23(1) |
| C(33B) | 11350(17) | 4741(15) | 4116(7)  | 29(1) |
| C(34B) | 10829(18) | 5958(14) | 4145(7)  | 42(1) |
| O(3B)  | 7194(10)  | 4913(15) | 5246(5)  | 32(1) |
| O(4B)  | 6663(4)   | 3692(6)  | 4724(2)  | 35(1) |
| O(5B)  | 11114(6)  | 2555(8)  | 4020(2)  | 28(1) |
| O(6B)  | 12358(10) | 3487(14) | 3733(5)  | 26(1) |
| C(1)   | 510(2)    | 8470(3)  | 922(1)   | 55(1) |
| C(2)   | 1497(2)   | 9058(2)  | 1106(1)  | 28(1) |
| C(3)   | 2320(2)   | 8333(2)  | 1353(1)  | 28(1) |
| C(4)   | 3213(3)   | 9076(3)  | 1549(1)  | 70(1) |
| C(5)   | 2223(2)   | 7119(2)  | 1368(1)  | 23(1) |
| C(6)   | 2915(2)   | 6160(2)  | 1553(1)  | 22(1) |
| C(7)   | 3981(2)   | 6457(2)  | 1759(1)  | 27(1) |
| C(8)   | 2561(2)   | 5022(2)  | 1518(1)  | 23(1) |
| C(9)   | 3132(2)   | 3871(2)  | 1664(1)  | 24(1) |
| C(10)  | 2432(2)   | 2902(2)  | 1789(1)  | 34(1) |
| C(11)  | 3702(2)   | 3433(2)  | 1334(1)  | 21(1) |
| C(12)  | 3041(2)   | 2831(2)  | 976(1)   | 24(1) |
| C(13)  | 3609(2)   | 2652(2)  | 623(1)   | 26(1) |
| C(14)  | 3308(2)   | 1501(2)  | 381(1)   | 31(1) |
| C(15)  | 2256(2)   | 1628(2)  | 124(1)   | 30(1) |

|       |          |          |         |       |
|-------|----------|----------|---------|-------|
| C(16) | 2217(2)  | 2759(2)  | -141(1) | 28(1) |
| C(17) | 2528(2)  | 3867(2)  | 124(1)  | 22(1) |
| C(18) | 2550(2)  | 5075(2)  | -105(1) | 23(1) |
| C(19) | 3298(2)  | 5066(3)  | -394(1) | 32(1) |
| C(20) | 1057(2)  | 6229(2)  | -200(1) | 25(1) |
| C(21) | 386(2)   | 5811(3)  | 92(1)   | 30(1) |
| C(22) | 462(2)   | 6910(2)  | -553(1) | 34(1) |
| C(23) | 2646(2)  | 6196(2)  | 186(1)  | 22(1) |
| C(24) | 3641(2)  | 6916(2)  | 274(1)  | 24(1) |
| C(25) | 3447(2)  | 8230(2)  | 378(1)  | 33(1) |
| C(26) | 4380(2)  | 6307(2)  | 620(1)  | 28(1) |
| C(35) | 8739(2)  | 4424(2)  | 1214(1) | 23(1) |
| C(36) | 9459(2)  | 5207(3)  | 1020(1) | 33(1) |
| C(37) | 9304(2)  | 3790(2)  | 1593(1) | 22(1) |
| C(38) | 9635(2)  | 4603(2)  | 1959(1) | 29(1) |
| C(39) | 10035(2) | 3839(3)  | 2333(1) | 31(1) |
| C(40) | 9218(2)  | 2935(2)  | 2399(1) | 28(1) |
| C(41) | 8888(2)  | 2161(2)  | 2026(1) | 23(1) |
| C(42) | 9737(2)  | 787(2)   | 1634(1) | 35(1) |
| C(43) | 7944(2)  | 1366(2)  | 2037(1) | 22(1) |
| C(44) | 8056(2)  | 615(2)   | 2425(1) | 29(1) |
| C(45) | 7009(2)  | 2149(2)  | 1974(1) | 22(1) |
| C(46) | 6112(2)  | 1885(2)  | 1751(1) | 28(1) |
| C(47) | 5844(3)  | 711(3)   | 1528(2) | 72(1) |
| C(48) | 5341(2)  | 2879(2)  | 1700(1) | 24(1) |
| O(1)  | 1614(1)  | 10138(2) | 1054(1) | 39(1) |
| O(2)  | 3516(1)  | 3703(2)  | 363(1)  | 24(1) |
| O(3)  | 1548(1)  | 5218(2)  | -344(1) | 25(1) |
| O(4)  | 1853(1)  | 6983(2)  | -11(1)  | 26(1) |
| O(7)  | 8601(1)  | 2875(1)  | 1676(1) | 20(1) |
| O(8)  | 9755(1)  | 1435(2)  | 2001(1) | 28(1) |
| O(9)  | 5499(1)  | 3913(2)  | 1812(1) | 32(1) |
| O(10) | 4446(1)  | 2497(1)  | 1489(1) | 24(1) |

|        |          |          |         |       |
|--------|----------|----------|---------|-------|
| C(27)  | 5457(2)  | 6808(3)  | 694(1)  | 32(1) |
| C(28)  | 6191(2)  | 6260(3)  | 1051(1) | 27(1) |
| C(29)  | 7421(3)  | 7005(3)  | 1602(1) | 34(1) |
| C(30)  | 7973(3)  | 8183(3)  | 1724(2) | 53(1) |
| C(31)  | 6968(3)  | 6474(4)  | 1951(1) | 39(1) |
| C(32)  | 7791(4)  | 5121(5)  | 1305(1) | 21(1) |
| C(33)  | 6987(3)  | 5394(3)  | 933(1)  | 23(1) |
| C(34)  | 6475(3)  | 4220(4)  | 749(1)  | 32(1) |
| O(5)   | 6668(2)  | 7286(2)  | 1265(1) | 35(1) |
| O(6)   | 8166(2)  | 6245(3)  | 1488(1) | 26(1) |
| C(27') | 5317(9)  | 6091(13) | 538(4)  | 32(1) |
| C(28') | 6108(11) | 5854(14) | 917(5)  | 27(1) |
| C(29') | 7270(12) | 7044(13) | 1387(5) | 34(1) |
| C(30') | 7730(13) | 8313(12) | 1418(7) | 53(1) |
| C(31') | 6885(15) | 6710(18) | 1771(5) | 39(1) |
| C(32') | 7800(20) | 5050(20) | 1218(8) | 21(1) |
| C(33') | 6944(13) | 5004(15) | 851(5)  | 23(1) |
| C(34') | 6643(13) | 3679(15) | 752(5)  | 32(1) |
| O(5')  | 6502(8)  | 7024(11) | 1055(4) | 35(1) |
| O(6')  | 8090(11) | 6265(13) | 1339(4) | 26(1) |

---

**Table S7.** Bond lengths [Å] and angles [°] for **1a**.

|               |          |               |           |
|---------------|----------|---------------|-----------|
| C(1A)-H(1AA)  | 0.9800   | C(12A)-C(13A) | 1.535(4)  |
| C(1A)-H(1AB)  | 0.9800   | C(13A)-H(13A) | 1.0000    |
| C(1A)-H(1AC)  | 0.9800   | C(13A)-C(14A) | 1.517(4)  |
| C(1A)-C(2A)   | 1.512(5) | C(13A)-O(2A)  | 1.444(4)  |
| C(2A)-C(3A)   | 1.483(4) | C(14A)-H(14A) | 0.9900    |
| C(2A)-O(1A)   | 1.225(4) | C(14A)-H(14B) | 0.9900    |
| C(3A)-C(4A)   | 1.506(5) | C(14A)-C(15A) | 1.526(4)  |
| C(3A)-C(5A)   | 1.347(4) | C(15A)-H(15A) | 0.9900    |
| C(4A)-H(4AA)  | 0.9800   | C(15A)-H(15B) | 0.9900    |
| C(4A)-H(4AB)  | 0.9800   | C(15A)-C(16A) | 1.521(4)  |
| C(4A)-H(4AC)  | 0.9800   | C(16A)-H(16A) | 0.9900    |
| C(5A)-H(5A)   | 0.9500   | C(16A)-H(16B) | 0.9900    |
| C(5A)-C(6A)   | 1.459(4) | C(16A)-C(17A) | 1.526(4)  |
| C(6A)-C(7A)   | 1.511(4) | C(17A)-H(17A) | 1.0000    |
| C(6A)-C(8A)   | 1.349(4) | C(17A)-H(17B) | 1.0000    |
| C(7A)-H(7AA)  | 0.9800   | C(17A)-O(2A)  | 1.436(3)  |
| C(7A)-H(7AB)  | 0.9800   | C(17A)-C(18A) | 1.543(14) |
| C(7A)-H(7AC)  | 0.9800   | C(17A)-C(18B) | 1.55(3)   |
| C(8A)-H(8A)   | 0.9500   | C(35A)-H(35A) | 1.0000    |
| C(8A)-C(9A)   | 1.502(4) | C(35A)-H(35B) | 1.0000    |
| C(9A)-H(9A)   | 1.0000   | C(35A)-C(36A) | 1.527(4)  |
| C(9A)-C(10A)  | 1.524(4) | C(35A)-C(37A) | 1.538(3)  |
| C(9A)-C(11A)  | 1.545(4) | C(35A)-C(32A) | 1.520(12) |
| C(10A)-H(10A) | 0.9800   | C(35A)-C(32B) | 1.58(3)   |
| C(10A)-H(10B) | 0.9800   | C(36A)-H(36A) | 0.9800    |
| C(10A)-H(10C) | 0.9800   | C(36A)-H(36B) | 0.9800    |
| C(11A)-H(11A) | 1.0000   | C(36A)-H(36C) | 0.9800    |
| C(11A)-C(12A) | 1.515(4) | C(37A)-H(37A) | 1.0000    |
| C(11A)-O(10A) | 1.464(3) | C(37A)-C(38A) | 1.520(4)  |
| C(12A)-H(12A) | 0.9900   | C(37A)-O(7A)  | 1.438(3)  |
| C(12A)-H(12B) | 0.9900   | C(38A)-H(38A) | 0.9900    |

|               |          |               |           |
|---------------|----------|---------------|-----------|
| C(38A)-H(38B) | 0.9900   | C(19A)-H(19A) | 0.9800    |
| C(38A)-C(39A) | 1.527(4) | C(19A)-H(19B) | 0.9800    |
| C(39A)-H(39A) | 0.9900   | C(19A)-H(19C) | 0.9800    |
| C(39A)-H(39B) | 0.9900   | C(20A)-C(21A) | 1.510(8)  |
| C(39A)-C(40A) | 1.529(4) | C(20A)-C(22A) | 1.504(6)  |
| C(40A)-H(40A) | 0.9900   | C(20A)-O(3A)  | 1.434(8)  |
| C(40A)-H(40B) | 0.9900   | C(20A)-O(4A)  | 1.414(7)  |
| C(40A)-C(41A) | 1.514(4) | C(21A)-H(21A) | 0.9800    |
| C(41A)-C(44A) | 1.544(4) | C(21A)-H(21B) | 0.9800    |
| C(41A)-O(7A)  | 1.420(3) | C(21A)-H(21C) | 0.9800    |
| C(41A)-O(8A)  | 1.424(3) | C(22A)-H(22A) | 0.9800    |
| C(42A)-H(42A) | 0.9800   | C(22A)-H(22B) | 0.9800    |
| C(42A)-H(42B) | 0.9800   | C(22A)-H(22C) | 0.9800    |
| C(42A)-H(42C) | 0.9800   | C(23A)-H(23A) | 1.0000    |
| C(42A)-O(8A)  | 1.423(5) | C(23A)-C(24A) | 1.537(8)  |
| C(43A)-H(43A) | 0.9800   | C(23A)-O(4A)  | 1.446(6)  |
| C(43A)-H(43B) | 0.9800   | C(24A)-H(24A) | 1.0000    |
| C(43A)-H(43C) | 0.9800   | C(24A)-C(25A) | 1.544(10) |
| C(43A)-C(44A) | 1.535(4) | C(24A)-C(26A) | 1.549(10) |
| C(44A)-H(44A) | 1.0000   | C(25A)-H(25A) | 0.9800    |
| C(44A)-C(45A) | 1.499(4) | C(25A)-H(25B) | 0.9800    |
| C(45A)-H(45A) | 0.9500   | C(25A)-H(25C) | 0.9800    |
| C(45A)-C(46A) | 1.324(4) | C(26A)-H(26A) | 0.9900    |
| C(46A)-C(47A) | 1.501(4) | C(26A)-H(26B) | 0.9900    |
| C(46A)-C(48A) | 1.490(4) | C(26A)-C(27A) | 1.375(6)  |
| C(47A)-H(47A) | 0.9800   | C(27A)-H(27A) | 0.9900    |
| C(47A)-H(47B) | 0.9800   | C(27A)-H(27B) | 0.9900    |
| C(47A)-H(47C) | 0.9800   | C(27A)-C(28A) | 1.521(5)  |
| C(48A)-O(9A)  | 1.209(3) | C(28A)-H(28A) | 1.0000    |
| C(48A)-O(10A) | 1.348(3) | C(28A)-C(33A) | 1.523(8)  |
| C(18A)-C(19A) | 1.531(8) | C(28A)-O(5A)  | 1.440(5)  |
| C(18A)-C(23A) | 1.562(8) | C(29A)-C(30A) | 1.514(6)  |
| C(18A)-O(3A)  | 1.453(7) | C(29A)-C(31A) | 1.521(6)  |



|               |           |               |           |
|---------------|-----------|---------------|-----------|
| C(29A)-O(5A)  | 1.417(5)  | C(23B)-C(24B) | 1.52(2)   |
| C(29A)-O(6A)  | 1.423(7)  | C(23B)-O(4B)  | 1.432(15) |
| C(30A)-H(30A) | 0.9800    | C(24B)-H(24B) | 1.0000    |
| C(30A)-H(30B) | 0.9800    | C(24B)-C(25B) | 1.55(2)   |
| C(30A)-H(30C) | 0.9800    | C(24B)-C(26B) | 1.521(19) |
| C(31A)-H(31A) | 0.9800    | C(25B)-H(25D) | 0.9800    |
| C(31A)-H(31B) | 0.9800    | C(25B)-H(25E) | 0.9800    |
| C(31A)-H(31C) | 0.9800    | C(25B)-H(25F) | 0.9800    |
| C(32A)-H(32A) | 1.0000    | C(26B)-H(26C) | 0.9900    |
| C(32A)-C(33A) | 1.541(8)  | C(26B)-H(26D) | 0.9900    |
| C(32A)-O(6A)  | 1.438(6)  | C(26B)-C(27B) | 1.389(12) |
| C(33A)-H(33A) | 1.0000    | C(27B)-H(27C) | 0.9900    |
| C(33A)-C(34A) | 1.535(7)  | C(27B)-H(27D) | 0.9900    |
| C(34A)-H(34A) | 0.9800    | C(27B)-C(28B) | 1.511(13) |
| C(34A)-H(34B) | 0.9800    | C(28B)-H(28B) | 1.0000    |
| C(34A)-H(34C) | 0.9800    | C(28B)-C(33B) | 1.533(17) |
| C(18B)-C(19B) | 1.52(2)   | C(28B)-O(5B)  | 1.442(13) |
| C(18B)-C(23B) | 1.575(18) | C(29B)-C(30B) | 1.498(14) |
| C(18B)-O(3B)  | 1.394(18) | C(29B)-C(31B) | 1.533(15) |
| C(19B)-H(19D) | 0.9800    | C(29B)-O(5B)  | 1.411(11) |
| C(19B)-H(19E) | 0.9800    | C(29B)-O(6B)  | 1.434(16) |
| C(19B)-H(19F) | 0.9800    | C(30B)-H(30D) | 0.9800    |
| C(20B)-C(21B) | 1.530(17) | C(30B)-H(30E) | 0.9800    |
| C(20B)-C(22B) | 1.494(15) | C(30B)-H(30F) | 0.9800    |
| C(20B)-O(3B)  | 1.403(18) | C(31B)-H(31D) | 0.9800    |
| C(20B)-O(4B)  | 1.442(15) | C(31B)-H(31E) | 0.9800    |
| C(21B)-H(21D) | 0.9800    | C(31B)-H(31F) | 0.9800    |
| C(21B)-H(21E) | 0.9800    | C(32B)-H(32B) | 1.0000    |
| C(21B)-H(21F) | 0.9800    | C(32B)-C(33B) | 1.520(18) |
| C(22B)-H(22D) | 0.9800    | C(32B)-O(6B)  | 1.426(17) |
| C(22B)-H(22E) | 0.9800    | C(33B)-H(33B) | 1.0000    |
| C(22B)-H(22F) | 0.9800    | C(33B)-C(34B) | 1.523(17) |
| C(23B)-H(23B) | 1.0000    | C(34B)-H(34D) | 0.9800    |

|               |          |              |          |
|---------------|----------|--------------|----------|
| C(34B)-H(34E) | 0.9800   | C(12)-C(13)  | 1.537(3) |
| C(34B)-H(34F) | 0.9800   | C(13)-H(13)  | 1.0000   |
| C(1)-H(1A)    | 0.9800   | C(13)-C(14)  | 1.523(3) |
| C(1)-H(1B)    | 0.9800   | C(13)-O(2)   | 1.446(3) |
| C(1)-H(1C)    | 0.9800   | C(14)-H(14C) | 0.9900   |
| C(1)-C(2)     | 1.503(4) | C(14)-H(14D) | 0.9900   |
| C(2)-C(3)     | 1.490(4) | C(14)-C(15)  | 1.523(4) |
| C(2)-O(1)     | 1.217(3) | C(15)-H(15C) | 0.9900   |
| C(3)-C(4)     | 1.502(4) | C(15)-H(15D) | 0.9900   |
| C(3)-C(5)     | 1.347(4) | C(15)-C(16)  | 1.531(4) |
| C(4)-H(4A)    | 0.9800   | C(16)-H(16C) | 0.9900   |
| C(4)-H(4B)    | 0.9800   | C(16)-H(16D) | 0.9900   |
| C(4)-H(4C)    | 0.9800   | C(16)-C(17)  | 1.527(3) |
| C(5)-H(5)     | 0.9500   | C(17)-H(17)  | 1.0000   |
| C(5)-C(6)     | 1.470(3) | C(17)-C(18)  | 1.542(3) |
| C(6)-C(7)     | 1.507(3) | C(17)-O(2)   | 1.433(3) |
| C(6)-C(8)     | 1.339(3) | C(18)-C(19)  | 1.519(3) |
| C(7)-H(7A)    | 0.9800   | C(18)-C(23)  | 1.568(3) |
| C(7)-H(7B)    | 0.9800   | C(18)-O(3)   | 1.447(3) |
| C(7)-H(7C)    | 0.9800   | C(19)-H(19G) | 0.9800   |
| C(8)-H(8)     | 0.9500   | C(19)-H(19H) | 0.9800   |
| C(8)-C(9)     | 1.518(3) | C(19)-H(19I) | 0.9800   |
| C(9)-H(9)     | 1.0000   | C(20)-C(21)  | 1.521(3) |
| C(9)-C(10)    | 1.529(4) | C(20)-C(22)  | 1.508(3) |
| C(9)-C(11)    | 1.537(3) | C(20)-O(3)   | 1.423(3) |
| C(10)-H(10D)  | 0.9800   | C(20)-O(4)   | 1.412(3) |
| C(10)-H(10E)  | 0.9800   | C(21)-H(21G) | 0.9800   |
| C(10)-H(10F)  | 0.9800   | C(21)-H(21H) | 0.9800   |
| C(11)-H(11)   | 1.0000   | C(21)-H(21I) | 0.9800   |
| C(11)-C(12)   | 1.518(3) | C(22)-H(22G) | 0.9800   |
| C(11)-O(10)   | 1.464(3) | C(22)-H(22H) | 0.9800   |
| C(12)-H(12C)  | 0.9900   | C(22)-H(22I) | 0.9800   |
| C(12)-H(12D)  | 0.9900   | C(23)-H(23)  | 1.0000   |

|              |           |              |          |
|--------------|-----------|--------------|----------|
| C(23)-C(24)  | 1.534(3)  | C(40)-H(40D) | 0.9900   |
| C(23)-O(4)   | 1.439(3)  | C(40)-C(41)  | 1.522(3) |
| C(24)-H(24)  | 1.0000    | C(41)-C(43)  | 1.545(3) |
| C(24)-C(25)  | 1.523(3)  | C(41)-O(7)   | 1.414(3) |
| C(24)-C(26)  | 1.542(3)  | C(41)-O(8)   | 1.425(3) |
| C(25)-H(25G) | 0.9800    | C(42)-H(42D) | 0.9800   |
| C(25)-H(25H) | 0.9800    | C(42)-H(42E) | 0.9800   |
| C(25)-H(25I) | 0.9800    | C(42)-H(42F) | 0.9800   |
| C(26)-H(26E) | 0.9900    | C(42)-O(8)   | 1.426(3) |
| C(26)-H(26F) | 0.9900    | C(43)-H(43)  | 1.0000   |
| C(26)-H(26G) | 0.9900    | C(43)-C(44)  | 1.532(3) |
| C(26)-H(26H) | 0.9900    | C(43)-C(45)  | 1.506(3) |
| C(26)-C(27)  | 1.522(4)  | C(44)-H(44B) | 0.9800   |
| C(26)-C(27') | 1.354(14) | C(44)-H(44C) | 0.9800   |
| C(35)-H(35)  | 1.0000    | C(44)-H(44D) | 0.9800   |
| C(35)-H(35C) | 1.0000    | C(45)-H(45)  | 0.9500   |
| C(35)-C(36)  | 1.526(3)  | C(45)-C(46)  | 1.330(3) |
| C(35)-C(37)  | 1.535(3)  | C(46)-C(47)  | 1.509(4) |
| C(35)-C(32)  | 1.562(6)  | C(46)-C(48)  | 1.494(3) |
| C(35)-C(32') | 1.43(3)   | C(47)-H(47D) | 0.9800   |
| C(36)-H(36D) | 0.9800    | C(47)-H(47E) | 0.9800   |
| C(36)-H(36E) | 0.9800    | C(47)-H(47F) | 0.9800   |
| C(36)-H(36F) | 0.9800    | C(48)-O(9)   | 1.207(3) |
| C(37)-H(37)  | 1.0000    | C(48)-O(10)  | 1.348(3) |
| C(37)-C(38)  | 1.526(3)  | C(27)-H(27E) | 0.9900   |
| C(37)-O(7)   | 1.440(3)  | C(27)-H(27F) | 0.9900   |
| C(38)-H(38C) | 0.9900    | C(27)-C(28)  | 1.534(4) |
| C(38)-H(38D) | 0.9900    | C(28)-H(28)  | 1.0000   |
| C(38)-C(39)  | 1.531(4)  | C(28)-C(33)  | 1.537(5) |
| C(39)-H(39C) | 0.9900    | C(28)-O(5)   | 1.430(4) |
| C(39)-H(39D) | 0.9900    | C(29)-C(30)  | 1.514(5) |
| C(39)-C(40)  | 1.526(4)  | C(29)-C(31)  | 1.532(6) |
| C(40)-H(40C) | 0.9900    | C(29)-O(5)   | 1.413(4) |

|               |           |                     |           |
|---------------|-----------|---------------------|-----------|
| C(29)-O(6)    | 1.409(4)  | C(32')-O(6')        | 1.43(2)   |
| C(30)-H(30G)  | 0.9800    | C(33')-H(33')       | 1.0000    |
| C(30)-H(30H)  | 0.9800    | C(33')-C(34')       | 1.536(17) |
| C(30)-H(30I)  | 0.9800    | C(34')-H(34J)       | 0.9800    |
| C(31)-H(31G)  | 0.9800    | C(34')-H(34K)       | 0.9800    |
| C(31)-H(31H)  | 0.9800    | C(34')-H(34L)       | 0.9800    |
| C(31)-H(31I)  | 0.9800    |                     |           |
| C(32)-H(32)   | 1.0000    | H(1AA)-C(1A)-H(1AB) | 109.5     |
| C(32)-C(33)   | 1.531(5)  | H(1AA)-C(1A)-H(1AC) | 109.5     |
| C(32)-O(6)    | 1.434(5)  | H(1AB)-C(1A)-H(1AC) | 109.5     |
| C(33)-H(33)   | 1.0000    | C(2A)-C(1A)-H(1AA)  | 109.5     |
| C(33)-C(34)   | 1.542(5)  | C(2A)-C(1A)-H(1AB)  | 109.5     |
| C(34)-H(34G)  | 0.9800    | C(2A)-C(1A)-H(1AC)  | 109.5     |
| C(34)-H(34H)  | 0.9800    | C(3A)-C(2A)-C(1A)   | 119.8(3)  |
| C(34)-H(34I)  | 0.9800    | O(1A)-C(2A)-C(1A)   | 119.9(3)  |
| C(27')-H(27G) | 0.9900    | O(1A)-C(2A)-C(3A)   | 120.2(3)  |
| C(27')-H(27H) | 0.9900    | C(2A)-C(3A)-C(4A)   | 113.5(3)  |
| C(27')-C(28') | 1.530(16) | C(5A)-C(3A)-C(2A)   | 119.8(3)  |
| C(28')-H(28') | 1.0000    | C(5A)-C(3A)-C(4A)   | 126.7(3)  |
| C(28')-C(33') | 1.506(18) | C(3A)-C(4A)-H(4AA)  | 109.5     |
| C(28')-O(5')  | 1.440(15) | C(3A)-C(4A)-H(4AB)  | 109.5     |
| C(29')-C(30') | 1.524(17) | C(3A)-C(4A)-H(4AC)  | 109.5     |
| C(29')-C(31') | 1.522(19) | H(4AA)-C(4A)-H(4AB) | 109.5     |
| C(29')-O(5')  | 1.378(17) | H(4AA)-C(4A)-H(4AC) | 109.5     |
| C(29')-O(6')  | 1.426(18) | H(4AB)-C(4A)-H(4AC) | 109.5     |
| C(30')-H(30J) | 0.9800    | C(3A)-C(5A)-H(5A)   | 114.1     |
| C(30')-H(30K) | 0.9800    | C(3A)-C(5A)-C(6A)   | 131.7(3)  |
| C(30')-H(30L) | 0.9800    | C(6A)-C(5A)-H(5A)   | 114.1     |
| C(31')-H(31J) | 0.9800    | C(5A)-C(6A)-C(7A)   | 120.7(3)  |
| C(31')-H(31K) | 0.9800    | C(8A)-C(6A)-C(5A)   | 117.9(3)  |
| C(31')-H(31L) | 0.9800    | C(8A)-C(6A)-C(7A)   | 121.4(3)  |
| C(32')-H(32') | 1.0000    | C(6A)-C(7A)-H(7AA)  | 109.5     |
| C(32')-C(33') | 1.53(2)   | C(6A)-C(7A)-H(7AB)  | 109.5     |

|                      |            |                      |          |
|----------------------|------------|----------------------|----------|
| C(6A)-C(7A)-H(7AC)   | 109.5      | C(14A)-C(13A)-H(13A) | 106.5    |
| H(7AA)-C(7A)-H(7AB)  | 109.5      | O(2A)-C(13A)-C(12A)  | 111.8(2) |
| H(7AA)-C(7A)-H(7AC)  | 109.5      | O(2A)-C(13A)-H(13A)  | 106.5    |
| H(7AB)-C(7A)-H(7AC)  | 109.5      | O(2A)-C(13A)-C(14A)  | 111.2(2) |
| C(6A)-C(8A)-H(8A)    | 116.5      | C(13A)-C(14A)-H(14A) | 109.4    |
| C(6A)-C(8A)-C(9A)    | 126.9(3)   | C(13A)-C(14A)-H(14B) | 109.4    |
| C(9A)-C(8A)-H(8A)    | 116.5      | C(13A)-C(14A)-C(15A) | 111.1(2) |
| C(8A)-C(9A)-H(9A)    | 107.7      | H(14A)-C(14A)-H(14B) | 108.0    |
| C(8A)-C(9A)-C(10A)   | 112.9(2)   | C(15A)-C(14A)-H(14A) | 109.4    |
| C(8A)-C(9A)-C(11A)   | 107.8(2)   | C(15A)-C(14A)-H(14B) | 109.4    |
| C(10A)-C(9A)-H(9A)   | 107.7      | C(14A)-C(15A)-H(15A) | 109.9    |
| C(10A)-C(9A)-C(11A)  | 112.8(2)   | C(14A)-C(15A)-H(15B) | 109.9    |
| C(11A)-C(9A)-H(9A)   | 107.7      | H(15A)-C(15A)-H(15B) | 108.3    |
| C(9A)-C(10A)-H(10A)  | 109.5      | C(16A)-C(15A)-C(14A) | 109.0(2) |
| C(9A)-C(10A)-H(10B)  | 109.5      | C(16A)-C(15A)-H(15A) | 109.9    |
| C(9A)-C(10A)-H(10C)  | 109.5      | C(16A)-C(15A)-H(15B) | 109.9    |
| H(10A)-C(10A)-H(10B) | 109.5      | C(15A)-C(16A)-H(16A) | 109.5    |
| H(10A)-C(10A)-H(10C) | 109.5      | C(15A)-C(16A)-H(16B) | 109.5    |
| H(10B)-C(10A)-H(10C) | 109.5      | C(15A)-C(16A)-C(17A) | 110.5(2) |
| C(9A)-C(11A)-H(11A)  | 108.9      | H(16A)-C(16A)-H(16B) | 108.1    |
| C(12A)-C(11A)-C(9A)  | 114.6(2)   | C(17A)-C(16A)-H(16A) | 109.5    |
| C(12A)-C(11A)-H(11A) | 108.9      | C(17A)-C(16A)-H(16B) | 109.5    |
| O(10A)-C(11A)-C(9A)  | 110.86(19) | C(16A)-C(17A)-H(17A) | 107.3    |
| O(10A)-C(11A)-H(11A) | 108.9      | C(16A)-C(17A)-H(17B) | 110.0    |
| O(10A)-C(11A)-C(12A) | 104.4(2)   | C(16A)-C(17A)-C(18A) | 113.1(4) |
| C(11A)-C(12A)-H(12A) | 109.1      | C(16A)-C(17A)-C(18B) | 115.9(9) |
| C(11A)-C(12A)-H(12B) | 109.1      | O(2A)-C(17A)-C(16A)  | 111.0(2) |
| C(11A)-C(12A)-C(13A) | 112.5(2)   | O(2A)-C(17A)-H(17A)  | 107.3    |
| H(12A)-C(12A)-H(12B) | 107.8      | O(2A)-C(17A)-H(17B)  | 110.0    |
| C(13A)-C(12A)-H(12A) | 109.1      | O(2A)-C(17A)-C(18A)  | 110.4(3) |
| C(13A)-C(12A)-H(12B) | 109.1      | O(2A)-C(17A)-C(18B)  | 99.5(8)  |
| C(12A)-C(13A)-H(13A) | 106.5      | C(18A)-C(17A)-H(17A) | 107.3    |
| C(14A)-C(13A)-C(12A) | 113.8(2)   | C(18B)-C(17A)-H(17B) | 110.0    |

|                      |            |                      |          |
|----------------------|------------|----------------------|----------|
| C(36A)-C(35A)-H(35A) | 105.2      | C(40A)-C(39A)-H(39A) | 109.7    |
| C(36A)-C(35A)-H(35B) | 109.0      | C(40A)-C(39A)-H(39B) | 109.7    |
| C(36A)-C(35A)-C(37A) | 111.4(2)   | C(39A)-C(40A)-H(40A) | 109.4    |
| C(36A)-C(35A)-C(32B) | 108.4(11)  | C(39A)-C(40A)-H(40B) | 109.4    |
| C(37A)-C(35A)-H(35A) | 105.2      | H(40A)-C(40A)-H(40B) | 108.0    |
| C(37A)-C(35A)-H(35B) | 109.0      | C(41A)-C(40A)-C(39A) | 111.3(2) |
| C(37A)-C(35A)-C(32B) | 110.1(11)  | C(41A)-C(40A)-H(40A) | 109.4    |
| C(32A)-C(35A)-H(35A) | 105.2      | C(41A)-C(40A)-H(40B) | 109.4    |
| C(32A)-C(35A)-C(36A) | 115.0(5)   | C(40A)-C(41A)-C(44A) | 114.8(2) |
| C(32A)-C(35A)-C(37A) | 113.7(5)   | O(7A)-C(41A)-C(40A)  | 111.6(2) |
| C(32B)-C(35A)-H(35B) | 109.0      | O(7A)-C(41A)-C(44A)  | 103.9(2) |
| C(35A)-C(36A)-H(36A) | 109.5      | O(7A)-C(41A)-O(8A)   | 110.9(2) |
| C(35A)-C(36A)-H(36B) | 109.5      | O(8A)-C(41A)-C(40A)  | 104.1(2) |
| C(35A)-C(36A)-H(36C) | 109.5      | O(8A)-C(41A)-C(44A)  | 111.8(2) |
| H(36A)-C(36A)-H(36B) | 109.5      | H(42A)-C(42A)-H(42B) | 109.5    |
| H(36A)-C(36A)-H(36C) | 109.5      | H(42A)-C(42A)-H(42C) | 109.5    |
| H(36B)-C(36A)-H(36C) | 109.5      | H(42B)-C(42A)-H(42C) | 109.5    |
| C(35A)-C(37A)-H(37A) | 108.5      | O(8A)-C(42A)-H(42A)  | 109.5    |
| C(38A)-C(37A)-C(35A) | 116.2(2)   | O(8A)-C(42A)-H(42B)  | 109.5    |
| C(38A)-C(37A)-H(37A) | 108.5      | O(8A)-C(42A)-H(42C)  | 109.5    |
| O(7A)-C(37A)-C(35A)  | 104.46(19) | H(43A)-C(43A)-H(43B) | 109.5    |
| O(7A)-C(37A)-H(37A)  | 108.5      | H(43A)-C(43A)-H(43C) | 109.5    |
| O(7A)-C(37A)-C(38A)  | 110.4(2)   | H(43B)-C(43A)-H(43C) | 109.5    |
| C(37A)-C(38A)-H(38A) | 109.7      | C(44A)-C(43A)-H(43A) | 109.5    |
| C(37A)-C(38A)-H(38B) | 109.7      | C(44A)-C(43A)-H(43B) | 109.5    |
| C(37A)-C(38A)-C(39A) | 109.9(2)   | C(44A)-C(43A)-H(43C) | 109.5    |
| H(38A)-C(38A)-H(38B) | 108.2      | C(41A)-C(44A)-H(44A) | 107.5    |
| C(39A)-C(38A)-H(38A) | 109.7      | C(43A)-C(44A)-C(41A) | 112.3(2) |
| C(39A)-C(38A)-H(38B) | 109.7      | C(43A)-C(44A)-H(44A) | 107.5    |
| C(38A)-C(39A)-H(39A) | 109.7      | C(45A)-C(44A)-C(41A) | 109.9(2) |
| C(38A)-C(39A)-H(39B) | 109.7      | C(45A)-C(44A)-C(43A) | 111.8(2) |
| C(38A)-C(39A)-C(40A) | 109.8(2)   | C(45A)-C(44A)-H(44A) | 107.5    |
| H(39A)-C(39A)-H(39B) | 108.2      | C(44A)-C(45A)-H(45A) | 116.0    |

|                      |            |                      |          |
|----------------------|------------|----------------------|----------|
| C(46A)-C(45A)-C(44A) | 128.1(3)   | O(4A)-C(20A)-C(21A)  | 111.4(5) |
| C(46A)-C(45A)-H(45A) | 116.0      | O(4A)-C(20A)-C(22A)  | 108.1(4) |
| C(45A)-C(46A)-C(47A) | 125.5(2)   | O(4A)-C(20A)-O(3A)   | 105.9(4) |
| C(45A)-C(46A)-C(48A) | 116.5(2)   | C(20A)-C(21A)-H(21A) | 109.5    |
| C(48A)-C(46A)-C(47A) | 117.8(2)   | C(20A)-C(21A)-H(21B) | 109.5    |
| C(46A)-C(47A)-H(47A) | 109.5      | C(20A)-C(21A)-H(21C) | 109.5    |
| C(46A)-C(47A)-H(47B) | 109.5      | H(21A)-C(21A)-H(21B) | 109.5    |
| C(46A)-C(47A)-H(47C) | 109.5      | H(21A)-C(21A)-H(21C) | 109.5    |
| H(47A)-C(47A)-H(47B) | 109.5      | H(21B)-C(21A)-H(21C) | 109.5    |
| H(47A)-C(47A)-H(47C) | 109.5      | C(20A)-C(22A)-H(22A) | 109.5    |
| H(47B)-C(47A)-H(47C) | 109.5      | C(20A)-C(22A)-H(22B) | 109.5    |
| O(9A)-C(48A)-C(46A)  | 125.3(2)   | C(20A)-C(22A)-H(22C) | 109.5    |
| O(9A)-C(48A)-O(10A)  | 123.1(2)   | H(22A)-C(22A)-H(22B) | 109.5    |
| O(10A)-C(48A)-C(46A) | 111.6(2)   | H(22A)-C(22A)-H(22C) | 109.5    |
| C(17A)-O(2A)-C(13A)  | 115.2(2)   | H(22B)-C(22A)-H(22C) | 109.5    |
| C(41A)-O(7A)-C(37A)  | 117.25(19) | C(18A)-C(23A)-H(23A) | 109.1    |
| C(42A)-O(8A)-C(41A)  | 116.4(2)   | C(24A)-C(23A)-C(18A) | 121.3(7) |
| C(48A)-O(10A)-C(11A) | 117.54(19) | C(24A)-C(23A)-H(23A) | 109.1    |
| C(17A)-C(18A)-C(23A) | 115.0(8)   | O(4A)-C(23A)-C(18A)  | 102.9(5) |
| C(19A)-C(18A)-C(17A) | 109.8(8)   | O(4A)-C(23A)-H(23A)  | 109.1    |
| C(19A)-C(18A)-C(23A) | 114.6(8)   | O(4A)-C(23A)-C(24A)  | 104.5(6) |
| O(3A)-C(18A)-C(17A)  | 106.8(7)   | C(23A)-C(24A)-H(24A) | 107.9    |
| O(3A)-C(18A)-C(19A)  | 106.8(7)   | C(23A)-C(24A)-C(25A) | 112.0(7) |
| O(3A)-C(18A)-C(23A)  | 103.0(6)   | C(23A)-C(24A)-C(26A) | 111.2(7) |
| C(18A)-C(19A)-H(19A) | 109.5      | C(25A)-C(24A)-H(24A) | 107.9    |
| C(18A)-C(19A)-H(19B) | 109.5      | C(25A)-C(24A)-C(26A) | 109.8(8) |
| C(18A)-C(19A)-H(19C) | 109.5      | C(26A)-C(24A)-H(24A) | 107.9    |
| H(19A)-C(19A)-H(19B) | 109.5      | C(24A)-C(25A)-H(25A) | 109.5    |
| H(19A)-C(19A)-H(19C) | 109.5      | C(24A)-C(25A)-H(25B) | 109.5    |
| H(19B)-C(19A)-H(19C) | 109.5      | C(24A)-C(25A)-H(25C) | 109.5    |
| C(22A)-C(20A)-C(21A) | 112.3(5)   | H(25A)-C(25A)-H(25B) | 109.5    |
| O(3A)-C(20A)-C(21A)  | 109.8(6)   | H(25A)-C(25A)-H(25C) | 109.5    |
| O(3A)-C(20A)-C(22A)  | 109.1(5)   | H(25B)-C(25A)-H(25C) | 109.5    |

|                      |          |                      |           |
|----------------------|----------|----------------------|-----------|
| C(24A)-C(26A)-H(26A) | 107.7    | H(31A)-C(31A)-H(31B) | 109.5     |
| C(24A)-C(26A)-H(26B) | 107.7    | H(31A)-C(31A)-H(31C) | 109.5     |
| H(26A)-C(26A)-H(26B) | 107.1    | H(31B)-C(31A)-H(31C) | 109.5     |
| C(27A)-C(26A)-C(24A) | 118.5(7) | C(35A)-C(32A)-H(32A) | 108.6     |
| C(27A)-C(26A)-H(26A) | 107.7    | C(35A)-C(32A)-C(33A) | 115.7(8)  |
| C(27A)-C(26A)-H(26B) | 107.7    | C(33A)-C(32A)-H(32A) | 108.6     |
| C(26A)-C(27A)-H(27A) | 108.7    | O(6A)-C(32A)-C(35A)  | 105.4(7)  |
| C(26A)-C(27A)-H(27B) | 108.7    | O(6A)-C(32A)-H(32A)  | 108.6     |
| C(26A)-C(27A)-C(28A) | 114.1(4) | O(6A)-C(32A)-C(33A)  | 109.6(6)  |
| H(27A)-C(27A)-H(27B) | 107.6    | C(28A)-C(33A)-C(32A) | 107.7(6)  |
| C(28A)-C(27A)-H(27A) | 108.7    | C(28A)-C(33A)-H(33A) | 109.3     |
| C(28A)-C(27A)-H(27B) | 108.7    | C(28A)-C(33A)-C(34A) | 110.9(6)  |
| C(27A)-C(28A)-H(28A) | 108.3    | C(32A)-C(33A)-H(33A) | 109.3     |
| C(27A)-C(28A)-C(33A) | 116.1(4) | C(34A)-C(33A)-C(32A) | 110.1(6)  |
| C(33A)-C(28A)-H(28A) | 108.3    | C(34A)-C(33A)-H(33A) | 109.3     |
| O(5A)-C(28A)-C(27A)  | 105.7(3) | C(33A)-C(34A)-H(34A) | 109.5     |
| O(5A)-C(28A)-H(28A)  | 108.3    | C(33A)-C(34A)-H(34B) | 109.5     |
| O(5A)-C(28A)-C(33A)  | 109.9(4) | C(33A)-C(34A)-H(34C) | 109.5     |
| C(30A)-C(29A)-C(31A) | 110.9(4) | H(34A)-C(34A)-H(34B) | 109.5     |
| O(5A)-C(29A)-C(30A)  | 106.5(4) | H(34A)-C(34A)-H(34C) | 109.5     |
| O(5A)-C(29A)-C(31A)  | 111.3(4) | H(34B)-C(34A)-H(34C) | 109.5     |
| O(5A)-C(29A)-O(6A)   | 110.6(4) | C(20A)-O(3A)-C(18A)  | 109.5(5)  |
| O(6A)-C(29A)-C(30A)  | 106.0(4) | C(20A)-O(4A)-C(23A)  | 106.5(4)  |
| O(6A)-C(29A)-C(31A)  | 111.4(5) | C(29A)-O(5A)-C(28A)  | 114.6(3)  |
| C(29A)-C(30A)-H(30A) | 109.5    | C(29A)-O(6A)-C(32A)  | 115.9(6)  |
| C(29A)-C(30A)-H(30B) | 109.5    | C(17A)-C(18B)-C(23B) | 105.5(19) |
| C(29A)-C(30A)-H(30C) | 109.5    | C(19B)-C(18B)-C(17A) | 120(2)    |
| H(30A)-C(30A)-H(30B) | 109.5    | C(19B)-C(18B)-C(23B) | 115(2)    |
| H(30A)-C(30A)-H(30C) | 109.5    | O(3B)-C(18B)-C(17A)  | 102.9(17) |
| H(30B)-C(30A)-H(30C) | 109.5    | O(3B)-C(18B)-C(19B)  | 110(2)    |
| C(29A)-C(31A)-H(31A) | 109.5    | O(3B)-C(18B)-C(23B)  | 101.5(14) |
| C(29A)-C(31A)-H(31B) | 109.5    | C(18B)-C(19B)-H(19D) | 109.5     |
| C(29A)-C(31A)-H(31C) | 109.5    | C(18B)-C(19B)-H(19E) | 109.5     |



|                      |           |                      |           |
|----------------------|-----------|----------------------|-----------|
| C(18B)-C(19B)-H(19F) | 109.5     | C(26B)-C(24B)-C(25B) | 108.6(17) |
| H(19D)-C(19B)-H(19E) | 109.5     | C(24B)-C(25B)-H(25D) | 109.5     |
| H(19D)-C(19B)-H(19F) | 109.5     | C(24B)-C(25B)-H(25E) | 109.5     |
| H(19E)-C(19B)-H(19F) | 109.5     | C(24B)-C(25B)-H(25F) | 109.5     |
| C(22B)-C(20B)-C(21B) | 112.5(13) | H(25D)-C(25B)-H(25E) | 109.5     |
| O(3B)-C(20B)-C(21B)  | 112.0(14) | H(25D)-C(25B)-H(25F) | 109.5     |
| O(3B)-C(20B)-C(22B)  | 108.8(14) | H(25E)-C(25B)-H(25F) | 109.5     |
| O(3B)-C(20B)-O(4B)   | 103.2(11) | C(24B)-C(26B)-H(26C) | 104.1     |
| O(4B)-C(20B)-C(21B)  | 108.1(11) | C(24B)-C(26B)-H(26D) | 104.1     |
| O(4B)-C(20B)-C(22B)  | 111.9(13) | H(26C)-C(26B)-H(26D) | 105.5     |
| C(20B)-C(21B)-H(21D) | 109.5     | C(27B)-C(26B)-C(24B) | 132.6(15) |
| C(20B)-C(21B)-H(21E) | 109.5     | C(27B)-C(26B)-H(26C) | 104.1     |
| C(20B)-C(21B)-H(21F) | 109.5     | C(27B)-C(26B)-H(26D) | 104.1     |
| H(21D)-C(21B)-H(21E) | 109.5     | C(26B)-C(27B)-H(27C) | 105.2     |
| H(21D)-C(21B)-H(21F) | 109.5     | C(26B)-C(27B)-H(27D) | 105.2     |
| H(21E)-C(21B)-H(21F) | 109.5     | C(26B)-C(27B)-C(28B) | 128.4(9)  |
| C(20B)-C(22B)-H(22D) | 109.5     | H(27C)-C(27B)-H(27D) | 105.9     |
| C(20B)-C(22B)-H(22E) | 109.5     | C(28B)-C(27B)-H(27C) | 105.2     |
| C(20B)-C(22B)-H(22F) | 109.5     | C(28B)-C(27B)-H(27D) | 105.2     |
| H(22D)-C(22B)-H(22E) | 109.5     | C(27B)-C(28B)-H(28B) | 107.7     |
| H(22D)-C(22B)-H(22F) | 109.5     | C(27B)-C(28B)-C(33B) | 116.7(11) |
| H(22E)-C(22B)-H(22F) | 109.5     | C(33B)-C(28B)-H(28B) | 107.7     |
| C(18B)-C(23B)-H(23B) | 105.7     | O(5B)-C(28B)-C(27B)  | 106.0(9)  |
| C(24B)-C(23B)-C(18B) | 119.3(19) | O(5B)-C(28B)-H(28B)  | 107.7     |
| C(24B)-C(23B)-H(23B) | 105.7     | O(5B)-C(28B)-C(33B)  | 110.5(11) |
| O(4B)-C(23B)-C(18B)  | 101.7(11) | C(30B)-C(29B)-C(31B) | 112.0(9)  |
| O(4B)-C(23B)-H(23B)  | 105.7     | O(5B)-C(29B)-C(30B)  | 107.2(9)  |
| O(4B)-C(23B)-C(24B)  | 117.6(15) | O(5B)-C(29B)-C(31B)  | 112.7(9)  |
| C(23B)-C(24B)-H(24B) | 108.9     | O(5B)-C(29B)-O(6B)   | 108.8(10) |
| C(23B)-C(24B)-C(25B) | 108.5(18) | O(6B)-C(29B)-C(30B)  | 103.9(10) |
| C(23B)-C(24B)-C(26B) | 112.9(19) | O(6B)-C(29B)-C(31B)  | 111.7(12) |
| C(25B)-C(24B)-H(24B) | 108.9     | C(29B)-C(30B)-H(30D) | 109.5     |
| C(26B)-C(24B)-H(24B) | 108.9     | C(29B)-C(30B)-H(30E) | 109.5     |

|                      |           |                  |          |
|----------------------|-----------|------------------|----------|
| C(29B)-C(30B)-H(30F) | 109.5     | H(1A)-C(1)-H(1C) | 109.5    |
| H(30D)-C(30B)-H(30E) | 109.5     | H(1B)-C(1)-H(1C) | 109.5    |
| H(30D)-C(30B)-H(30F) | 109.5     | C(2)-C(1)-H(1A)  | 109.5    |
| H(30E)-C(30B)-H(30F) | 109.5     | C(2)-C(1)-H(1B)  | 109.5    |
| C(29B)-C(31B)-H(31D) | 109.5     | C(2)-C(1)-H(1C)  | 109.5    |
| C(29B)-C(31B)-H(31E) | 109.5     | C(3)-C(2)-C(1)   | 120.5(2) |
| C(29B)-C(31B)-H(31F) | 109.5     | O(1)-C(2)-C(1)   | 119.3(2) |
| H(31D)-C(31B)-H(31E) | 109.5     | O(1)-C(2)-C(3)   | 120.2(2) |
| H(31D)-C(31B)-H(31F) | 109.5     | C(2)-C(3)-C(4)   | 113.9(2) |
| H(31E)-C(31B)-H(31F) | 109.5     | C(5)-C(3)-C(2)   | 119.2(2) |
| C(35A)-C(32B)-H(32B) | 107.8     | C(5)-C(3)-C(4)   | 126.9(3) |
| C(33B)-C(32B)-C(35A) | 111.9(17) | C(3)-C(4)-H(4A)  | 109.5    |
| C(33B)-C(32B)-H(32B) | 107.8     | C(3)-C(4)-H(4B)  | 109.5    |
| O(6B)-C(32B)-C(35A)  | 108.6(19) | C(3)-C(4)-H(4C)  | 109.5    |
| O(6B)-C(32B)-H(32B)  | 107.8     | H(4A)-C(4)-H(4B) | 109.5    |
| O(6B)-C(32B)-C(33B)  | 112.9(17) | H(4A)-C(4)-H(4C) | 109.5    |
| C(28B)-C(33B)-H(33B) | 107.2     | H(4B)-C(4)-H(4C) | 109.5    |
| C(32B)-C(33B)-C(28B) | 108.5(15) | C(3)-C(5)-H(5)   | 113.9    |
| C(32B)-C(33B)-H(33B) | 107.2     | C(3)-C(5)-C(6)   | 132.3(2) |
| C(32B)-C(33B)-C(34B) | 114.0(17) | C(6)-C(5)-H(5)   | 113.9    |
| C(34B)-C(33B)-C(28B) | 112.5(15) | C(5)-C(6)-C(7)   | 120.9(2) |
| C(34B)-C(33B)-H(33B) | 107.2     | C(8)-C(6)-C(5)   | 116.7(2) |
| C(33B)-C(34B)-H(34D) | 109.5     | C(8)-C(6)-C(7)   | 122.4(2) |
| C(33B)-C(34B)-H(34E) | 109.5     | C(6)-C(7)-H(7A)  | 109.5    |
| C(33B)-C(34B)-H(34F) | 109.5     | C(6)-C(7)-H(7B)  | 109.5    |
| H(34D)-C(34B)-H(34E) | 109.5     | C(6)-C(7)-H(7C)  | 109.5    |
| H(34D)-C(34B)-H(34F) | 109.5     | H(7A)-C(7)-H(7B) | 109.5    |
| H(34E)-C(34B)-H(34F) | 109.5     | H(7A)-C(7)-H(7C) | 109.5    |
| C(18B)-O(3B)-C(20B)  | 115.3(13) | H(7B)-C(7)-H(7C) | 109.5    |
| C(23B)-O(4B)-C(20B)  | 110.6(11) | C(6)-C(8)-H(8)   | 116.4    |
| C(29B)-O(5B)-C(28B)  | 116.7(8)  | C(6)-C(8)-C(9)   | 127.3(2) |
| C(32B)-O(6B)-C(29B)  | 114.2(15) | C(9)-C(8)-H(8)   | 116.4    |
| H(1A)-C(1)-H(1B)     | 109.5     | C(8)-C(9)-H(9)   | 107.8    |

|                     |            |                     |            |
|---------------------|------------|---------------------|------------|
| C(8)-C(9)-C(10)     | 112.1(2)   | C(15)-C(14)-H(14C)  | 109.4      |
| C(8)-C(9)-C(11)     | 108.28(19) | C(15)-C(14)-H(14D)  | 109.4      |
| C(10)-C(9)-H(9)     | 107.8      | C(14)-C(15)-H(15C)  | 109.7      |
| C(10)-C(9)-C(11)    | 112.9(2)   | C(14)-C(15)-H(15D)  | 109.7      |
| C(11)-C(9)-H(9)     | 107.8      | C(14)-C(15)-C(16)   | 109.8(2)   |
| C(9)-C(10)-H(10D)   | 109.5      | H(15C)-C(15)-H(15D) | 108.2      |
| C(9)-C(10)-H(10E)   | 109.5      | C(16)-C(15)-H(15C)  | 109.7      |
| C(9)-C(10)-H(10F)   | 109.5      | C(16)-C(15)-H(15D)  | 109.7      |
| H(10D)-C(10)-H(10E) | 109.5      | C(15)-C(16)-H(16C)  | 109.8      |
| H(10D)-C(10)-H(10F) | 109.5      | C(15)-C(16)-H(16D)  | 109.8      |
| H(10E)-C(10)-H(10F) | 109.5      | H(16C)-C(16)-H(16D) | 108.2      |
| C(9)-C(11)-H(11)    | 109.0      | C(17)-C(16)-C(15)   | 109.4(2)   |
| C(12)-C(11)-C(9)    | 114.81(19) | C(17)-C(16)-H(16C)  | 109.8      |
| C(12)-C(11)-H(11)   | 109.0      | C(17)-C(16)-H(16D)  | 109.8      |
| O(10)-C(11)-C(9)    | 110.94(18) | C(16)-C(17)-H(17)   | 107.9      |
| O(10)-C(11)-H(11)   | 109.0      | C(16)-C(17)-C(18)   | 115.19(19) |
| O(10)-C(11)-C(12)   | 103.84(18) | C(18)-C(17)-H(17)   | 107.9      |
| C(11)-C(12)-H(12C)  | 109.2      | O(2)-C(17)-C(16)    | 110.89(18) |
| C(11)-C(12)-H(12D)  | 109.2      | O(2)-C(17)-H(17)    | 107.9      |
| C(11)-C(12)-C(13)   | 111.97(19) | O(2)-C(17)-C(18)    | 106.94(18) |
| H(12C)-C(12)-H(12D) | 107.9      | C(17)-C(18)-C(23)   | 112.03(18) |
| C(13)-C(12)-H(12C)  | 109.2      | C(19)-C(18)-C(17)   | 112.9(2)   |
| C(13)-C(12)-H(12D)  | 109.2      | C(19)-C(18)-C(23)   | 114.6(2)   |
| C(12)-C(13)-H(13)   | 106.8      | O(3)-C(18)-C(17)    | 105.91(18) |
| C(14)-C(13)-C(12)   | 113.7(2)   | O(3)-C(18)-C(19)    | 107.15(19) |
| C(14)-C(13)-H(13)   | 106.8      | O(3)-C(18)-C(23)    | 103.17(18) |
| O(2)-C(13)-C(12)    | 111.46(18) | C(18)-C(19)-H(19G)  | 109.5      |
| O(2)-C(13)-H(13)    | 106.8      | C(18)-C(19)-H(19H)  | 109.5      |
| O(2)-C(13)-C(14)    | 110.91(19) | C(18)-C(19)-H(19I)  | 109.5      |
| C(13)-C(14)-H(14C)  | 109.4      | H(19G)-C(19)-H(19H) | 109.5      |
| C(13)-C(14)-H(14D)  | 109.4      | H(19G)-C(19)-H(19I) | 109.5      |
| H(14C)-C(14)-H(14D) | 108.0      | H(19H)-C(19)-H(19I) | 109.5      |
| C(15)-C(14)-C(13)   | 111.00(19) | C(22)-C(20)-C(21)   | 111.8(2)   |

|                     |            |                     |           |
|---------------------|------------|---------------------|-----------|
| O(3)-C(20)-C(21)    | 110.4(2)   | H(25G)-C(25)-H(25I) | 109.5     |
| O(3)-C(20)-C(22)    | 109.4(2)   | H(25H)-C(25)-H(25I) | 109.5     |
| O(4)-C(20)-C(21)    | 111.84(19) | C(24)-C(26)-H(26E)  | 108.4     |
| O(4)-C(20)-C(22)    | 108.2(2)   | C(24)-C(26)-H(26F)  | 108.4     |
| O(4)-C(20)-O(3)     | 104.93(18) | C(24)-C(26)-H(26G)  | 108.6     |
| C(20)-C(21)-H(21G)  | 109.5      | C(24)-C(26)-H(26H)  | 108.6     |
| C(20)-C(21)-H(21H)  | 109.5      | H(26E)-C(26)-H(26F) | 107.5     |
| C(20)-C(21)-H(21I)  | 109.5      | H(26G)-C(26)-H(26H) | 107.6     |
| H(21G)-C(21)-H(21H) | 109.5      | C(27)-C(26)-C(24)   | 115.3(2)  |
| H(21G)-C(21)-H(21I) | 109.5      | C(27)-C(26)-H(26E)  | 108.4     |
| H(21H)-C(21)-H(21I) | 109.5      | C(27)-C(26)-H(26F)  | 108.4     |
| C(20)-C(22)-H(22G)  | 109.5      | C(27')-C(26)-C(24)  | 114.5(6)  |
| C(20)-C(22)-H(22H)  | 109.5      | C(27')-C(26)-H(26G) | 108.6     |
| C(20)-C(22)-H(22I)  | 109.5      | C(27')-C(26)-H(26H) | 108.6     |
| H(22G)-C(22)-H(22H) | 109.5      | C(36)-C(35)-H(35)   | 106.8     |
| H(22G)-C(22)-H(22I) | 109.5      | C(36)-C(35)-H(35C)  | 104.2     |
| H(22H)-C(22)-H(22I) | 109.5      | C(36)-C(35)-C(37)   | 111.2(2)  |
| C(18)-C(23)-H(23)   | 108.4      | C(36)-C(35)-C(32)   | 113.9(3)  |
| C(24)-C(23)-C(18)   | 120.04(19) | C(37)-C(35)-H(35)   | 106.8     |
| C(24)-C(23)-H(23)   | 108.4      | C(37)-C(35)-H(35C)  | 104.2     |
| O(4)-C(23)-C(18)    | 102.43(17) | C(37)-C(35)-C(32)   | 110.8(2)  |
| O(4)-C(23)-H(23)    | 108.4      | C(32)-C(35)-H(35)   | 106.8     |
| O(4)-C(23)-C(24)    | 108.73(18) | C(32')-C(35)-H(35C) | 104.2     |
| C(23)-C(24)-H(24)   | 108.4      | C(32')-C(35)-C(36)  | 110.6(12) |
| C(23)-C(24)-C(26)   | 109.82(19) | C(32')-C(35)-C(37)  | 120.7(12) |
| C(25)-C(24)-C(23)   | 111.0(2)   | C(35)-C(36)-H(36D)  | 109.5     |
| C(25)-C(24)-H(24)   | 108.4      | C(35)-C(36)-H(36E)  | 109.5     |
| C(25)-C(24)-C(26)   | 110.7(2)   | C(35)-C(36)-H(36F)  | 109.5     |
| C(26)-C(24)-H(24)   | 108.4      | H(36D)-C(36)-H(36E) | 109.5     |
| C(24)-C(25)-H(25G)  | 109.5      | H(36D)-C(36)-H(36F) | 109.5     |
| C(24)-C(25)-H(25H)  | 109.5      | H(36E)-C(36)-H(36F) | 109.5     |
| C(24)-C(25)-H(25I)  | 109.5      | C(35)-C(37)-H(37)   | 108.6     |
| H(25G)-C(25)-H(25H) | 109.5      | C(38)-C(37)-C(35)   | 115.9(2)  |

|                     |            |                     |            |
|---------------------|------------|---------------------|------------|
| C(38)-C(37)-H(37)   | 108.6      | O(8)-C(42)-H(42F)   | 109.5      |
| O(7)-C(37)-C(35)    | 103.86(18) | C(41)-C(43)-H(43)   | 107.5      |
| O(7)-C(37)-H(37)    | 108.6      | C(44)-C(43)-C(41)   | 111.91(19) |
| O(7)-C(37)-C(38)    | 111.09(19) | C(44)-C(43)-H(43)   | 107.5      |
| C(37)-C(38)-H(38C)  | 109.5      | C(45)-C(43)-C(41)   | 109.60(19) |
| C(37)-C(38)-H(38D)  | 109.5      | C(45)-C(43)-H(43)   | 107.5      |
| C(37)-C(38)-C(39)   | 110.5(2)   | C(45)-C(43)-C(44)   | 112.46(19) |
| H(38C)-C(38)-H(38D) | 108.1      | C(43)-C(44)-H(44B)  | 109.5      |
| C(39)-C(38)-H(38C)  | 109.5      | C(43)-C(44)-H(44C)  | 109.5      |
| C(39)-C(38)-H(38D)  | 109.5      | C(43)-C(44)-H(44D)  | 109.5      |
| C(38)-C(39)-H(39C)  | 109.9      | H(44B)-C(44)-H(44C) | 109.5      |
| C(38)-C(39)-H(39D)  | 109.9      | H(44B)-C(44)-H(44D) | 109.5      |
| H(39C)-C(39)-H(39D) | 108.3      | H(44C)-C(44)-H(44D) | 109.5      |
| C(40)-C(39)-C(38)   | 109.0(2)   | C(43)-C(45)-H(45)   | 116.6      |
| C(40)-C(39)-H(39C)  | 109.9      | C(46)-C(45)-C(43)   | 126.8(2)   |
| C(40)-C(39)-H(39D)  | 109.9      | C(46)-C(45)-H(45)   | 116.6      |
| C(39)-C(40)-H(40C)  | 109.5      | C(45)-C(46)-C(47)   | 125.5(2)   |
| C(39)-C(40)-H(40D)  | 109.5      | C(45)-C(46)-C(48)   | 116.2(2)   |
| H(40C)-C(40)-H(40D) | 108.1      | C(48)-C(46)-C(47)   | 118.3(2)   |
| C(41)-C(40)-C(39)   | 110.7(2)   | C(46)-C(47)-H(47D)  | 109.5      |
| C(41)-C(40)-H(40C)  | 109.5      | C(46)-C(47)-H(47E)  | 109.5      |
| C(41)-C(40)-H(40D)  | 109.5      | C(46)-C(47)-H(47F)  | 109.5      |
| C(40)-C(41)-C(43)   | 114.51(19) | H(47D)-C(47)-H(47E) | 109.5      |
| O(7)-C(41)-C(40)    | 112.0(2)   | H(47D)-C(47)-H(47F) | 109.5      |
| O(7)-C(41)-C(43)    | 103.63(17) | H(47E)-C(47)-H(47F) | 109.5      |
| O(7)-C(41)-O(8)     | 111.47(18) | O(9)-C(48)-C(46)    | 125.2(2)   |
| O(8)-C(41)-C(40)    | 104.25(19) | O(9)-C(48)-O(10)    | 123.3(2)   |
| O(8)-C(41)-C(43)    | 111.22(19) | O(10)-C(48)-C(46)   | 111.3(2)   |
| H(42D)-C(42)-H(42E) | 109.5      | C(17)-O(2)-C(13)    | 114.41(17) |
| H(42D)-C(42)-H(42F) | 109.5      | C(20)-O(3)-C(18)    | 109.47(17) |
| H(42E)-C(42)-H(42F) | 109.5      | C(20)-O(4)-C(23)    | 106.80(17) |
| O(8)-C(42)-H(42D)   | 109.5      | C(41)-O(7)-C(37)    | 117.52(17) |
| O(8)-C(42)-H(42E)   | 109.5      | C(41)-O(8)-C(42)    | 116.50(18) |

|                     |            |                      |           |
|---------------------|------------|----------------------|-----------|
| C(48)-O(10)-C(11)   | 116.94(17) | C(33)-C(32)-H(32)    | 109.2     |
| C(26)-C(27)-H(27E)  | 108.2      | O(6)-C(32)-C(35)     | 106.0(4)  |
| C(26)-C(27)-H(27F)  | 108.2      | O(6)-C(32)-H(32)     | 109.2     |
| C(26)-C(27)-C(28)   | 116.2(3)   | O(6)-C(32)-C(33)     | 108.9(4)  |
| H(27E)-C(27)-H(27F) | 107.4      | C(28)-C(33)-H(33)    | 108.7     |
| C(28)-C(27)-H(27E)  | 108.2      | C(28)-C(33)-C(34)    | 110.3(3)  |
| C(28)-C(27)-H(27F)  | 108.2      | C(32)-C(33)-C(28)    | 109.1(3)  |
| C(27)-C(28)-H(28)   | 108.9      | C(32)-C(33)-H(33)    | 108.7     |
| C(27)-C(28)-C(33)   | 114.7(3)   | C(32)-C(33)-C(34)    | 111.2(3)  |
| C(33)-C(28)-H(28)   | 108.9      | C(34)-C(33)-H(33)    | 108.7     |
| O(5)-C(28)-C(27)    | 104.5(3)   | C(33)-C(34)-H(34G)   | 109.5     |
| O(5)-C(28)-H(28)    | 108.9      | C(33)-C(34)-H(34H)   | 109.5     |
| O(5)-C(28)-C(33)    | 110.8(2)   | C(33)-C(34)-H(34I)   | 109.5     |
| C(30)-C(29)-C(31)   | 111.2(4)   | H(34G)-C(34)-H(34H)  | 109.5     |
| O(5)-C(29)-C(30)    | 105.8(3)   | H(34G)-C(34)-H(34I)  | 109.5     |
| O(5)-C(29)-C(31)    | 112.2(3)   | H(34H)-C(34)-H(34I)  | 109.5     |
| O(6)-C(29)-C(30)    | 104.4(3)   | C(29)-O(5)-C(28)     | 115.0(2)  |
| O(6)-C(29)-C(31)    | 112.4(3)   | C(29)-O(6)-C(32)     | 114.9(3)  |
| O(6)-C(29)-O(5)     | 110.4(3)   | C(26)-C(27')-H(27G)  | 109.0     |
| C(29)-C(30)-H(30G)  | 109.5      | C(26)-C(27')-H(27H)  | 109.0     |
| C(29)-C(30)-H(30H)  | 109.5      | C(26)-C(27')-C(28')  | 112.8(12) |
| C(29)-C(30)-H(30I)  | 109.5      | H(27G)-C(27')-H(27H) | 107.8     |
| H(30G)-C(30)-H(30H) | 109.5      | C(28')-C(27')-H(27G) | 109.0     |
| H(30G)-C(30)-H(30I) | 109.5      | C(28')-C(27')-H(27H) | 109.0     |
| H(30H)-C(30)-H(30I) | 109.5      | C(27')-C(28')-H(28') | 108.4     |
| C(29)-C(31)-H(31G)  | 109.5      | C(33')-C(28')-C(27') | 113.9(13) |
| C(29)-C(31)-H(31H)  | 109.5      | C(33')-C(28')-H(28') | 108.4     |
| C(29)-C(31)-H(31I)  | 109.5      | O(5')-C(28')-C(27')  | 106.1(11) |
| H(31G)-C(31)-H(31H) | 109.5      | O(5')-C(28')-H(28')  | 108.4     |
| H(31G)-C(31)-H(31I) | 109.5      | O(5')-C(28')-C(33')  | 111.5(12) |
| H(31H)-C(31)-H(31I) | 109.5      | C(31')-C(29')-C(30') | 111.0(15) |
| C(35)-C(32)-H(32)   | 109.2      | O(5')-C(29')-C(30')  | 107.7(14) |
| C(33)-C(32)-C(35)   | 114.3(3)   | O(5')-C(29')-C(31')  | 111.7(13) |

|                      |           |                                                             |           |
|----------------------|-----------|-------------------------------------------------------------|-----------|
| O(5')-C(29')-O(6')   | 112.1(12) |                                                             |           |
| O(6')-C(29')-C(30')  | 104.5(13) | C(29')-O(5')-C(28')                                         | 117.0(11) |
| O(6')-C(29')-C(31')  | 109.6(14) | C(29')-O(6')-C(32')                                         | 115.1(16) |
| C(29')-C(30')-H(30J) | 109.5     | Symmetry transformations used to generate equivalent atoms: |           |
| C(29')-C(30')-H(30K) | 109.5     |                                                             |           |
| C(29')-C(30')-H(30L) | 109.5     |                                                             |           |
| H(30J)-C(30')-H(30K) | 109.5     |                                                             |           |
| H(30J)-C(30')-H(30L) | 109.5     |                                                             |           |
| H(30K)-C(30')-H(30L) | 109.5     |                                                             |           |
| C(29')-C(31')-H(31J) | 109.5     |                                                             |           |
| C(29')-C(31')-H(31K) | 109.5     |                                                             |           |
| C(29')-C(31')-H(31L) | 109.5     |                                                             |           |
| H(31J)-C(31')-H(31K) | 109.5     |                                                             |           |
| H(31J)-C(31')-H(31L) | 109.5     |                                                             |           |
| H(31K)-C(31')-H(31L) | 109.5     |                                                             |           |
| C(35)-C(32')-H(32')  | 105.7     |                                                             |           |
| C(35)-C(32')-C(33')  | 120.4(18) |                                                             |           |
| C(33')-C(32')-H(32') | 105.7     |                                                             |           |
| O(6')-C(32')-C(35)   | 105.4(18) |                                                             |           |
| O(6')-C(32')-H(32')  | 105.7     |                                                             |           |
| O(6')-C(32')-C(33')  | 112.7(17) |                                                             |           |
| C(28')-C(33')-C(32') | 109.3(15) |                                                             |           |
| C(28')-C(33')-H(33') | 106.8     |                                                             |           |
| C(28')-C(33')-C(34') | 116.8(14) |                                                             |           |
| C(32')-C(33')-H(33') | 106.8     |                                                             |           |
| C(32')-C(33')-C(34') | 109.8(15) |                                                             |           |
| C(34')-C(33')-H(33') | 106.8     |                                                             |           |
| C(33')-C(34')-H(34J) | 109.5     |                                                             |           |
| C(33')-C(34')-H(34K) | 109.5     |                                                             |           |
| C(33')-C(34')-H(34L) | 109.5     |                                                             |           |
| H(34J)-C(34')-H(34K) | 109.5     |                                                             |           |
| H(34J)-C(34')-H(34L) | 109.5     |                                                             |           |
| H(34K)-C(34')-H(34L) | 109.5     |                                                             |           |

**Table S8.** Anisotropic displacement parameters ( $\text{\AA}^2 \times 10^3$ ) for **1a**. The anisotropic displacement factor exponent takes the form:  $-2\pi^2 [h^2 a^{*2} U^{11} + \dots + 2 h k a^* b^* U^{12}]$

|        | $U^{11}$ | $U^{22}$ | $U^{33}$ | $U^{23}$ | $U^{13}$ | $U^{12}$ |
|--------|----------|----------|----------|----------|----------|----------|
| C(1A)  | 120(4)   | 50(2)    | 122(4)   | 6(2)     | 92(4)    | -10(2)   |
| C(2A)  | 45(2)    | 36(2)    | 52(2)    | 5(1)     | 11(1)    | -4(1)    |
| C(3A)  | 47(2)    | 37(2)    | 44(2)    | -3(1)    | 15(1)    | -7(1)    |
| C(4A)  | 134(4)   | 41(2)    | 106(3)   | -13(2)   | 84(3)    | -13(2)   |
| C(5A)  | 40(2)    | 39(2)    | 46(2)    | -2(1)    | 19(1)    | -6(1)    |
| C(6A)  | 39(2)    | 36(2)    | 42(2)    | -7(1)    | 18(1)    | -9(1)    |
| C(7A)  | 58(2)    | 36(2)    | 67(2)    | -9(1)    | 37(2)    | -8(2)    |
| C(8A)  | 35(1)    | 39(2)    | 36(1)    | -3(1)    | 16(1)    | -5(1)    |
| C(9A)  | 32(1)    | 36(1)    | 30(1)    | -1(1)    | 12(1)    | -6(1)    |
| C(10A) | 36(1)    | 48(2)    | 39(2)    | 7(1)     | 3(1)     | -7(1)    |
| C(11A) | 26(1)    | 32(1)    | 29(1)    | 6(1)     | 12(1)    | 1(1)     |
| C(12A) | 28(1)    | 42(2)    | 31(1)    | 1(1)     | 12(1)    | 2(1)     |
| C(13A) | 30(1)    | 52(2)    | 28(1)    | 0(1)     | 10(1)    | 1(1)     |
| C(14A) | 44(2)    | 44(2)    | 33(1)    | -2(1)    | 7(1)     | -8(1)    |
| C(15A) | 47(2)    | 36(1)    | 34(1)    | -4(1)    | 11(1)    | 3(1)     |
| C(16A) | 46(2)    | 38(2)    | 27(1)    | -2(1)    | 12(1)    | 4(1)     |
| C(17A) | 33(1)    | 40(2)    | 22(1)    | -4(1)    | 5(1)     | 5(1)     |
| C(35A) | 27(1)    | 32(1)    | 28(1)    | -2(1)    | 3(1)     | 0(1)     |
| C(36A) | 33(1)    | 45(2)    | 36(1)    | 2(1)     | -3(1)    | -2(1)    |
| C(37A) | 23(1)    | 35(1)    | 29(1)    | -1(1)    | 4(1)     | -3(1)    |
| C(38A) | 34(1)    | 39(2)    | 35(1)    | -4(1)    | 10(1)    | 4(1)     |
| C(39A) | 38(2)    | 54(2)    | 33(1)    | -5(1)    | 13(1)    | 1(1)     |
| C(40A) | 31(1)    | 61(2)    | 26(1)    | 3(1)     | 10(1)    | -2(1)    |
| C(41A) | 24(1)    | 43(2)    | 31(1)    | 6(1)     | 8(1)     | -6(1)    |
| C(42A) | 47(2)    | 49(2)    | 99(3)    | 6(2)     | 0(2)     | -18(2)   |
| C(43A) | 37(2)    | 76(2)    | 55(2)    | 33(2)    | 17(2)    | 10(2)    |
| C(44A) | 31(1)    | 42(2)    | 37(2)    | 10(1)    | 11(1)    | -1(1)    |



|        |       |       |       |        |       |        |
|--------|-------|-------|-------|--------|-------|--------|
| C(45A) | 29(1) | 35(1) | 28(1) | 5(1)   | 5(1)  | -2(1)  |
| C(46A) | 26(1) | 31(1) | 26(1) | 5(1)   | 6(1)  | -1(1)  |
| C(47A) | 45(2) | 31(1) | 42(2) | 3(1)   | 15(1) | -6(1)  |
| C(48A) | 26(1) | 32(1) | 26(1) | 0(1)   | 8(1)  | -1(1)  |
| O(1A)  | 58(1) | 38(1) | 68(2) | 8(1)   | 21(1) | -1(1)  |
| O(2A)  | 32(1) | 49(1) | 28(1) | -3(1)  | 8(1)  | 9(1)   |
| O(7A)  | 26(1) | 30(1) | 25(1) | 2(1)   | 6(1)  | -1(1)  |
| O(8A)  | 28(1) | 53(1) | 57(1) | 17(1)  | 9(1)  | -12(1) |
| O(9A)  | 38(1) | 31(1) | 55(1) | -9(1)  | 25(1) | -5(1)  |
| O(10A) | 28(1) | 28(1) | 29(1) | 1(1)   | 12(1) | 0(1)   |
| C(18A) | 29(4) | 36(2) | 25(2) | -6(1)  | 3(3)  | 7(3)   |
| C(19A) | 37(4) | 44(2) | 37(3) | -19(2) | -7(3) | 18(4)  |
| C(20A) | 31(2) | 46(3) | 38(4) | -7(3)  | 6(3)  | 7(2)   |
| C(21A) | 36(2) | 99(6) | 41(2) | -8(4)  | 10(2) | 19(4)  |
| C(22A) | 50(2) | 45(2) | 49(3) | 12(2)  | 21(2) | 14(2)  |
| C(23A) | 22(3) | 46(3) | 36(4) | -14(3) | 2(2)  | 3(2)   |
| C(24A) | 31(2) | 39(2) | 28(3) | -5(2)  | 5(2)  | 6(2)   |
| C(25A) | 48(4) | 40(2) | 51(4) | -17(2) | 14(2) | 13(3)  |
| C(26A) | 31(2) | 67(4) | 24(2) | 1(2)   | 4(2)  | 16(2)  |
| C(27A) | 33(2) | 37(2) | 23(2) | -3(2)  | 7(1)  | 0(2)   |
| C(28A) | 30(2) | 28(3) | 22(2) | 0(2)   | 2(1)  | 4(2)   |
| C(29A) | 40(3) | 28(3) | 17(2) | -7(2)  | 6(2)  | -3(2)  |
| C(30A) | 53(3) | 31(2) | 27(2) | -1(2)  | 15(2) | -4(2)  |
| C(31A) | 40(3) | 45(3) | 18(2) | -8(2)  | 10(2) | -9(2)  |
| C(32A) | 28(3) | 21(4) | 20(2) | -1(3)  | 1(1)  | 4(3)   |
| C(33A) | 32(2) | 34(4) | 20(3) | -3(3)  | 2(2)  | 0(3)   |
| C(34A) | 46(2) | 43(4) | 43(3) | -5(4)  | 20(2) | 2(4)   |
| O(3A)  | 45(3) | 32(2) | 25(1) | -2(1)  | 18(2) | 10(2)  |
| O(4A)  | 31(1) | 36(1) | 39(1) | -5(1)  | 14(1) | -2(1)  |
| O(5A)  | 37(2) | 30(2) | 18(1) | -4(1)  | 10(1) | 0(2)   |
| O(6A)  | 27(3) | 25(2) | 25(2) | -2(1)  | 4(2)  | 5(2)   |
| C(18B) | 29(4) | 36(2) | 25(2) | -6(1)  | 3(3)  | 7(3)   |
| C(19B) | 37(4) | 44(2) | 37(3) | -19(2) | -7(3) | 18(4)  |

|        |       |       |        |        |        |       |
|--------|-------|-------|--------|--------|--------|-------|
| C(20B) | 31(2) | 46(3) | 38(4)  | -7(3)  | 6(3)   | 7(2)  |
| C(21B) | 36(2) | 99(6) | 41(2)  | -8(4)  | 10(2)  | 19(4) |
| C(22B) | 50(2) | 45(2) | 49(3)  | 12(2)  | 21(2)  | 14(2) |
| C(23B) | 22(3) | 46(3) | 36(4)  | -14(3) | 2(2)   | 3(2)  |
| C(24B) | 31(2) | 39(2) | 28(3)  | -5(2)  | 5(2)   | 6(2)  |
| C(25B) | 48(4) | 40(2) | 51(4)  | -17(2) | 14(2)  | 13(3) |
| C(26B) | 31(2) | 67(4) | 24(2)  | 1(2)   | 4(2)   | 16(2) |
| C(27B) | 33(2) | 37(2) | 23(2)  | -3(2)  | 7(1)   | 0(2)  |
| C(28B) | 30(2) | 28(3) | 22(2)  | 0(2)   | 2(1)   | 4(2)  |
| C(29B) | 40(3) | 28(3) | 17(2)  | -7(2)  | 6(2)   | -3(2) |
| C(30B) | 53(3) | 31(2) | 27(2)  | -1(2)  | 15(2)  | -4(2) |
| C(31B) | 40(3) | 45(3) | 18(2)  | -8(2)  | 10(2)  | -9(2) |
| C(32B) | 28(3) | 21(4) | 20(2)  | -1(3)  | 1(1)   | 4(3)  |
| C(33B) | 32(2) | 34(4) | 20(3)  | -3(3)  | 2(2)   | 0(3)  |
| C(34B) | 46(2) | 43(4) | 43(3)  | -5(4)  | 20(2)  | 2(4)  |
| O(3B)  | 45(3) | 32(2) | 25(1)  | -2(1)  | 18(2)  | 10(2) |
| O(4B)  | 31(1) | 36(1) | 39(1)  | -5(1)  | 14(1)  | -2(1) |
| O(5B)  | 37(2) | 30(2) | 18(1)  | -4(1)  | 10(1)  | 0(2)  |
| O(6B)  | 27(3) | 25(2) | 25(2)  | -2(1)  | 4(2)   | 5(2)  |
| C(1)   | 42(2) | 22(1) | 88(3)  | 1(2)   | -22(2) | 5(1)  |
| C(2)   | 32(1) | 23(1) | 30(1)  | -2(1)  | 10(1)  | 4(1)  |
| C(3)   | 27(1) | 24(1) | 34(1)  | -5(1)  | 5(1)   | -1(1) |
| C(4)   | 54(2) | 23(1) | 114(3) | -1(2)  | -32(2) | -5(1) |
| C(5)   | 21(1) | 24(1) | 24(1)  | -3(1)  | 5(1)   | 0(1)  |
| C(6)   | 21(1) | 26(1) | 21(1)  | -3(1)  | 7(1)   | 2(1)  |
| C(7)   | 25(1) | 23(1) | 32(1)  | -3(1)  | 3(1)   | 1(1)  |
| C(8)   | 20(1) | 25(1) | 24(1)  | -2(1)  | 4(1)   | 2(1)  |
| C(9)   | 21(1) | 22(1) | 29(1)  | 2(1)   | 5(1)   | 3(1)  |
| C(10)  | 32(1) | 29(1) | 46(2)  | 7(1)   | 18(1)  | 3(1)  |
| C(11)  | 17(1) | 16(1) | 31(1)  | 3(1)   | 4(1)   | 1(1)  |
| C(12)  | 19(1) | 20(1) | 33(1)  | 2(1)   | 2(1)   | 1(1)  |
| C(13)  | 20(1) | 24(1) | 31(1)  | -1(1)  | 2(1)   | 3(1)  |
| C(14)  | 33(1) | 21(1) | 38(1)  | -2(1)  | 6(1)   | 8(1)  |

|       |       |       |        |        |        |       |
|-------|-------|-------|--------|--------|--------|-------|
| C(15) | 33(1) | 19(1) | 37(1)  | -8(1)  | 3(1)   | -2(1) |
| C(16) | 27(1) | 22(1) | 32(1)  | -7(1)  | 2(1)   | 2(1)  |
| C(17) | 20(1) | 23(1) | 25(1)  | -5(1)  | 4(1)   | -1(1) |
| C(18) | 21(1) | 25(1) | 22(1)  | -3(1)  | 4(1)   | -2(1) |
| C(19) | 38(1) | 31(1) | 32(1)  | -8(1)  | 16(1)  | -6(1) |
| C(20) | 25(1) | 23(1) | 25(1)  | -3(1)  | 1(1)   | -2(1) |
| C(21) | 24(1) | 38(1) | 27(1)  | 1(1)   | 2(1)   | 1(1)  |
| C(22) | 36(1) | 30(1) | 32(1)  | 6(1)   | -3(1)  | -5(1) |
| C(23) | 22(1) | 22(1) | 22(1)  | 0(1)   | 5(1)   | 0(1)  |
| C(24) | 25(1) | 23(1) | 24(1)  | -2(1)  | 5(1)   | -4(1) |
| C(25) | 30(1) | 25(1) | 44(2)  | -7(1)  | 3(1)   | -7(1) |
| C(26) | 25(1) | 30(1) | 29(1)  | 2(1)   | 2(1)   | -4(1) |
| C(35) | 22(1) | 22(1) | 25(1)  | 2(1)   | 2(1)   | -2(1) |
| C(36) | 27(1) | 34(1) | 37(1)  | 12(1)  | 6(1)   | 0(1)  |
| C(37) | 18(1) | 23(1) | 27(1)  | 3(1)   | 6(1)   | 1(1)  |
| C(38) | 26(1) | 30(1) | 31(1)  | 0(1)   | 2(1)   | -6(1) |
| C(39) | 26(1) | 41(2) | 24(1)  | -2(1)  | -1(1)  | -8(1) |
| C(40) | 24(1) | 36(1) | 23(1)  | 0(1)   | 4(1)   | -1(1) |
| C(41) | 19(1) | 27(1) | 21(1)  | 4(1)   | 3(1)   | 6(1)  |
| C(42) | 38(2) | 30(1) | 40(2)  | 6(1)   | 18(1)  | 13(1) |
| C(43) | 24(1) | 21(1) | 22(1)  | 0(1)   | 5(1)   | 4(1)  |
| C(44) | 28(1) | 29(1) | 31(1)  | 5(1)   | 9(1)   | 5(1)  |
| C(45) | 25(1) | 18(1) | 24(1)  | 1(1)   | 7(1)   | 2(1)  |
| C(46) | 25(1) | 19(1) | 40(1)  | 0(1)   | 0(1)   | 2(1)  |
| C(47) | 34(2) | 34(2) | 133(4) | -33(2) | -29(2) | 14(1) |
| C(48) | 20(1) | 23(1) | 30(1)  | 1(1)   | 4(1)   | 1(1)  |
| O(1)  | 36(1) | 20(1) | 61(1)  | 6(1)   | 9(1)   | 2(1)  |
| O(2)  | 20(1) | 24(1) | 28(1)  | -4(1)  | 4(1)   | -1(1) |
| O(3)  | 28(1) | 23(1) | 21(1)  | -3(1)  | 1(1)   | -1(1) |
| O(4)  | 26(1) | 21(1) | 29(1)  | -1(1)  | -2(1)  | 1(1)  |
| O(7)  | 20(1) | 18(1) | 21(1)  | 2(1)   | 2(1)   | 0(1)  |
| O(8)  | 22(1) | 33(1) | 30(1)  | 7(1)   | 7(1)   | 10(1) |
| O(9)  | 23(1) | 22(1) | 50(1)  | -8(1)  | -1(1)  | 2(1)  |

|        |       |       |       |        |        |       |
|--------|-------|-------|-------|--------|--------|-------|
| O(10)  | 18(1) | 19(1) | 33(1) | 1(1)   | 2(1)   | 1(1)  |
| C(27)  | 25(2) | 28(2) | 41(2) | 11(1)  | -1(1)  | -6(1) |
| C(28)  | 21(1) | 25(2) | 33(2) | 4(1)   | 0(1)   | -2(2) |
| C(29)  | 29(2) | 22(1) | 46(2) | -8(2)  | -3(2)  | 4(1)  |
| C(30)  | 44(2) | 24(2) | 83(3) | -18(2) | -15(2) | 5(2)  |
| C(31)  | 35(2) | 42(2) | 38(2) | -15(2) | 3(2)   | 11(2) |
| C(32)  | 24(1) | 16(1) | 22(3) | 2(2)   | 4(2)   | -2(1) |
| C(33)  | 23(1) | 22(2) | 24(2) | 2(1)   | 1(1)   | -6(2) |
| C(34)  | 28(2) | 34(2) | 33(2) | -10(2) | -1(1)  | 3(2)  |
| O(5)   | 29(1) | 19(1) | 52(2) | -3(1)  | -9(1)  | 3(1)  |
| O(6)   | 23(1) | 15(1) | 38(2) | -3(1)  | -1(1)  | 0(1)  |
| C(27') | 25(2) | 28(2) | 41(2) | 11(1)  | -1(1)  | -6(1) |
| C(28') | 21(1) | 25(2) | 33(2) | 4(1)   | 0(1)   | -2(2) |
| C(29') | 29(2) | 22(1) | 46(2) | -8(2)  | -3(2)  | 4(1)  |
| C(30') | 44(2) | 24(2) | 83(3) | -18(2) | -15(2) | 5(2)  |
| C(31') | 35(2) | 42(2) | 38(2) | -15(2) | 3(2)   | 11(2) |
| C(32') | 24(1) | 16(1) | 22(3) | 2(2)   | 4(2)   | -2(1) |
| C(33') | 23(1) | 22(2) | 24(2) | 2(1)   | 1(1)   | -6(2) |
| C(34') | 28(2) | 34(2) | 33(2) | -10(2) | -1(1)  | 3(2)  |
| O(5')  | 29(1) | 19(1) | 52(2) | -3(1)  | -9(1)  | 3(1)  |
| O(6')  | 23(1) | 15(1) | 38(2) | -3(1)  | -1(1)  | 0(1)  |

---

**Table S9.** Hydrogen coordinates ( $\times 10^4$ ) and isotropic displacement parameters ( $\text{\AA}^2 \times 10^3$ ) for **1a**.

|        | x     | y    | z    | U(eq) |
|--------|-------|------|------|-------|
| H(1AA) | 5343  | 2207 | 4313 | 133   |
| H(1AB) | 4560  | 1109 | 4310 | 133   |
| H(1AC) | 4333  | 2158 | 3978 | 133   |
| H(4AA) | 7236  | 633  | 3496 | 129   |
| H(4AB) | 6572  | 1152 | 3089 | 129   |
| H(4AC) | 6181  | 3    | 3308 | 129   |
| H(5A)  | 5564  | 3195 | 3746 | 48    |
| H(7AA) | 7804  | 2649 | 3358 | 76    |
| H(7AB) | 7894  | 3985 | 3182 | 76    |
| H(7AC) | 7196  | 2992 | 2919 | 76    |
| H(8A)  | 5677  | 5050 | 3487 | 43    |
| H(9A)  | 7081  | 5601 | 2977 | 38    |
| H(10A) | 5534  | 6561 | 2784 | 62    |
| H(10B) | 6360  | 7588 | 2934 | 62    |
| H(10C) | 5597  | 7156 | 3221 | 62    |
| H(11A) | 8012  | 5722 | 3659 | 34    |
| H(12A) | 6659  | 6663 | 3950 | 39    |
| H(12B) | 6917  | 7905 | 3745 | 39    |
| H(13A) | 8690  | 7490 | 4113 | 44    |
| H(14A) | 7725  | 9221 | 4241 | 48    |
| H(14B) | 8534  | 8778 | 4622 | 48    |
| H(15A) | 6991  | 9177 | 4840 | 46    |
| H(15B) | 6391  | 8292 | 4501 | 46    |
| H(16A) | 6716  | 7233 | 5118 | 43    |
| H(16B) | 7904  | 7527 | 5169 | 43    |
| H(17A) | 6785  | 6038 | 4547 | 38    |
| H(17B) | 6784  | 5964 | 4561 | 38    |
| H(35A) | 12704 | 6409 | 3950 | 35    |
| H(35B) | 12616 | 6365 | 3953 | 35    |

|        |       |      |      |    |
|--------|-------|------|------|----|
| H(36A) | 13970 | 4352 | 3940 | 58 |
| H(36B) | 13617 | 4860 | 4337 | 58 |
| H(36C) | 14320 | 5673 | 4107 | 58 |
| H(37A) | 13686 | 6434 | 3431 | 35 |
| H(38A) | 12417 | 4478 | 3075 | 43 |
| H(38B) | 13631 | 4428 | 3194 | 43 |
| H(39A) | 13108 | 4813 | 2487 | 49 |
| H(39B) | 13793 | 5903 | 2701 | 49 |
| H(40A) | 12362 | 6756 | 2291 | 47 |
| H(40B) | 11615 | 5922 | 2494 | 47 |
| H(42A) | 12955 | 9702 | 3063 | 99 |
| H(42B) | 14056 | 9127 | 3211 | 99 |
| H(42C) | 13114 | 8679 | 3405 | 99 |
| H(43A) | 11651 | 9042 | 2295 | 82 |
| H(43B) | 10490 | 9252 | 2332 | 82 |
| H(43C) | 10832 | 7996 | 2160 | 82 |
| H(44A) | 11364 | 8829 | 2974 | 43 |
| H(45A) | 10282 | 6629 | 2760 | 37 |
| H(47A) | 9841  | 8871 | 3588 | 58 |
| H(47B) | 8968  | 9296 | 3226 | 58 |
| H(47C) | 10135 | 9519 | 3200 | 58 |
| H(19A) | 9237  | 5318 | 5114 | 62 |
| H(19B) | 8860  | 4520 | 5455 | 62 |
| H(19C) | 8706  | 5960 | 5448 | 62 |
| H(21A) | 4996  | 3314 | 4942 | 87 |
| H(21B) | 5472  | 4312 | 4686 | 87 |
| H(21C) | 4995  | 4714 | 5068 | 87 |
| H(22A) | 5865  | 3966 | 5758 | 69 |
| H(22B) | 6981  | 3402 | 5804 | 69 |
| H(22C) | 6017  | 2614 | 5606 | 69 |
| H(23A) | 7044  | 3949 | 4524 | 42 |
| H(24A) | 8941  | 3072 | 4971 | 39 |
| H(25A) | 7887  | 1363 | 4856 | 69 |

|        |       |      |      |    |
|--------|-------|------|------|----|
| H(25B) | 8706  | 1273 | 4565 | 69 |
| H(25C) | 7570  | 1693 | 4388 | 69 |
| H(26A) | 8955  | 2933 | 4177 | 49 |
| H(26B) | 8466  | 4223 | 4236 | 49 |
| H(27A) | 10279 | 3598 | 4693 | 37 |
| H(27B) | 9817  | 4915 | 4578 | 37 |
| H(28A) | 9960  | 4339 | 3873 | 32 |
| H(30A) | 11356 | 925  | 3814 | 54 |
| H(30B) | 12346 | 1548 | 4069 | 54 |
| H(30C) | 12236 | 1410 | 3591 | 54 |
| H(31A) | 10986 | 2675 | 3136 | 51 |
| H(31B) | 10317 | 3654 | 3321 | 51 |
| H(31C) | 10082 | 2238 | 3354 | 51 |
| H(32A) | 11366 | 5121 | 3552 | 28 |
| H(33A) | 11812 | 4889 | 4420 | 35 |
| H(34A) | 10517 | 6571 | 3916 | 64 |
| H(34B) | 11491 | 6922 | 4245 | 64 |
| H(34C) | 10490 | 6417 | 4386 | 64 |
| H(19D) | 9441  | 5342 | 5060 | 62 |
| H(19E) | 9122  | 4446 | 5389 | 62 |
| H(19F) | 8980  | 5879 | 5430 | 62 |
| H(21D) | 4861  | 4124 | 4891 | 87 |
| H(21E) | 5397  | 5387 | 4825 | 87 |
| H(21F) | 5202  | 5019 | 5264 | 87 |
| H(22D) | 6294  | 3384 | 5650 | 69 |
| H(22E) | 7124  | 2708 | 5443 | 69 |
| H(22F) | 5942  | 2459 | 5286 | 69 |
| H(23B) | 7686  | 4298 | 4427 | 42 |
| H(24B) | 8885  | 3000 | 5031 | 39 |
| H(25D) | 7423  | 1708 | 4925 | 69 |
| H(25E) | 8345  | 1053 | 4769 | 69 |
| H(25F) | 7450  | 1659 | 4453 | 69 |
| H(26C) | 9224  | 2086 | 4382 | 49 |

|        |       |      |      |     |
|--------|-------|------|------|-----|
| H(26D) | 8707  | 3296 | 4200 | 49  |
| H(27C) | 10570 | 2949 | 4627 | 37  |
| H(27D) | 10078 | 4255 | 4571 | 37  |
| H(28B) | 10066 | 3815 | 3842 | 32  |
| H(30D) | 11826 | 679  | 3703 | 54  |
| H(30E) | 12699 | 1382 | 4002 | 54  |
| H(30F) | 12694 | 1386 | 3527 | 54  |
| H(31D) | 11304 | 2547 | 3066 | 51  |
| H(31E) | 10515 | 3325 | 3265 | 51  |
| H(31F) | 10447 | 1875 | 3259 | 51  |
| H(32B) | 11454 | 4837 | 3516 | 28  |
| H(33B) | 11849 | 4631 | 4372 | 35  |
| H(34D) | 10222 | 6008 | 3934 | 64  |
| H(34E) | 11297 | 6616 | 4109 | 64  |
| H(34F) | 10633 | 6033 | 4410 | 64  |
| H(1A)  | 627   | 7895 | 713  | 83  |
| H(1B)  | 28    | 9093 | 801  | 83  |
| H(1C)  | 231   | 8037 | 1131 | 83  |
| H(4A)  | 3733  | 9072 | 1379 | 104 |
| H(4B)  | 3494  | 8728 | 1813 | 104 |
| H(4C)  | 2994  | 9911 | 1584 | 104 |
| H(5)   | 1584  | 6826 | 1233 | 27  |
| H(7A)  | 4320  | 6934 | 1577 | 41  |
| H(7B)  | 4358  | 5703 | 1831 | 41  |
| H(7C)  | 3957  | 6926 | 2004 | 41  |
| H(8)   | 1877  | 4925 | 1387 | 28  |
| H(9)   | 3648  | 4082 | 1907 | 29  |
| H(10D) | 2167  | 3182 | 2025 | 51  |
| H(10E) | 2814  | 2148 | 1854 | 51  |
| H(10F) | 1866  | 2754 | 1566 | 51  |
| H(11)  | 4063  | 4137 | 1237 | 26  |
| H(12C) | 2432  | 3338 | 885  | 29  |
| H(12D) | 2810  | 2033 | 1059 | 29  |



|        |       |      |      |    |
|--------|-------|------|------|----|
| H(13)  | 4345  | 2570 | 742  | 31 |
| H(14C) | 3809  | 1335 | 205  | 37 |
| H(14D) | 3313  | 807  | 567  | 37 |
| H(15C) | 1741  | 1693 | 300  | 36 |
| H(15D) | 2098  | 900  | -48  | 36 |
| H(16C) | 2683  | 2661 | -336 | 33 |
| H(16D) | 1520  | 2872 | -295 | 33 |
| H(17)  | 2033  | 3956 | 311  | 27 |
| H(19G) | 3981  | 4894 | -244 | 49 |
| H(19H) | 3295  | 5860 | -525 | 49 |
| H(19I) | 3102  | 4438 | -598 | 49 |
| H(21G) | -9    | 6500 | 164  | 45 |
| H(21H) | 810   | 5487 | 336  | 45 |
| H(21I) | -77   | 5178 | -35  | 45 |
| H(22G) | -109  | 6410 | -683 | 51 |
| H(22H) | 904   | 7094 | -747 | 51 |
| H(22I) | 204   | 7668 | -457 | 51 |
| H(23)  | 2470  | 5929 | 448  | 26 |
| H(24)  | 3957  | 6908 | 27   | 29 |
| H(25G) | 2988  | 8607 | 152  | 50 |
| H(25H) | 4091  | 8674 | 428  | 50 |
| H(25I) | 3136  | 8256 | 619  | 50 |
| H(26E) | 4101  | 6393 | 871  | 34 |
| H(26F) | 4410  | 5430 | 561  | 34 |
| H(26G) | 4448  | 6833 | 861  | 34 |
| H(26H) | 4082  | 5528 | 687  | 34 |
| H(35)  | 8481  | 3772 | 1016 | 28 |
| H(35C) | 8546  | 3748 | 1017 | 28 |
| H(36D) | 9736  | 5855 | 1206 | 49 |
| H(36E) | 9088  | 5564 | 770  | 49 |
| H(36F) | 10015 | 4704 | 958  | 49 |
| H(37)  | 9917  | 3378 | 1526 | 27 |
| H(38C) | 9052  | 5096 | 2008 | 35 |

|        |       |      |      |     |
|--------|-------|------|------|-----|
| H(38D) | 10173 | 5163 | 1906 | 35  |
| H(39C) | 10655 | 3399 | 2295 | 37  |
| H(39D) | 10211 | 4371 | 2571 | 37  |
| H(40C) | 9485  | 2406 | 2631 | 33  |
| H(40D) | 8625  | 3380 | 2464 | 33  |
| H(42D) | 9225  | 1143 | 1422 | 52  |
| H(42E) | 9568  | -65  | 1672 | 52  |
| H(42F) | 10406 | 836  | 1555 | 52  |
| H(43)  | 7879  | 786  | 1806 | 26  |
| H(44B) | 8696  | 163  | 2462 | 43  |
| H(44C) | 7488  | 44   | 2405 | 43  |
| H(44D) | 8055  | 1156 | 2655 | 43  |
| H(45)  | 7065  | 2911 | 2107 | 27  |
| H(47D) | 6452  | 206  | 1548 | 109 |
| H(47E) | 5576  | 886  | 1244 | 109 |
| H(47F) | 5329  | 280  | 1646 | 109 |
| H(27E) | 5421  | 7694 | 738  | 38  |
| H(27F) | 5746  | 6683 | 447  | 38  |
| H(28)  | 5790  | 5816 | 1228 | 32  |
| H(30G) | 7508  | 8756 | 1818 | 80  |
| H(30H) | 8215  | 8529 | 1491 | 80  |
| H(30I) | 8552  | 8028 | 1940 | 80  |
| H(31G) | 7511  | 6327 | 2182 | 58  |
| H(31H) | 6625  | 5708 | 1865 | 58  |
| H(31I) | 6478  | 7048 | 2028 | 58  |
| H(32)  | 7474  | 4642 | 1502 | 25  |
| H(33)  | 7323  | 5802 | 727  | 28  |
| H(34G) | 6180  | 3785 | 953  | 49  |
| H(34H) | 6982  | 3704 | 655  | 49  |
| H(34I) | 5939  | 4425 | 521  | 49  |
| H(27G) | 5534  | 6798 | 393  | 38  |
| H(27H) | 5285  | 5379 | 357  | 38  |
| H(28') | 5756  | 5496 | 1127 | 32  |

|        |      |      |      |    |
|--------|------|------|------|----|
| H(30J) | 7239 | 8892 | 1491 | 80 |
| H(30K) | 7902 | 8543 | 1158 | 80 |
| H(30L) | 8346 | 8318 | 1625 | 80 |
| H(31J) | 7458 | 6670 | 1996 | 58 |
| H(31K) | 6547 | 5918 | 1736 | 58 |
| H(31L) | 6402 | 7326 | 1827 | 58 |
| H(32') | 7520 | 4692 | 1446 | 25 |
| H(33') | 7226 | 5329 | 618  | 28 |
| H(34J) | 6396 | 3311 | 980  | 49 |
| H(34K) | 7236 | 3229 | 698  | 49 |
| H(34L) | 6106 | 3653 | 513  | 49 |

---

The crystal structure data for derivatized **1a** of marinolide A is available in the CCDC/FIZ Karlsruhe depository under deposition number 2033847.

## Supplemental References

1. (a) Haydock, S. F.; Aparicio, J. F.; Molnar, I.; Schwecke, T.; Khaw, L. E.; Konig, A.; Marsden, A. F.; Galloway, I. S.; Staunton, J.; Leadlay, P. F., Divergent sequence motifs correlated with the substrate specificity of (methyl)malonyl-CoA:acyl carrier protein transacylase domains in modular polyketide synthases. *FEBS Lett* **1995**, *374* (2), 246-8; (b) Dunn, B. J.; Cane, D. E.; Khosla, C., Mechanism and specificity of an acyltransferase domain from a modular polyketide synthase. *Biochemistry* **2013**, *52* (11), 1839-41; (c) Dunn, B. J.; Khosla, C., Engineering the acyltransferase substrate specificity of assembly line polyketide synthases. *J R Soc Interface* **2013**, *10* (85), 20130297.
2. (a) Keatinge-Clay, A. T., A tylosin ketoreductase reveals how chirality is determined in polyketides. *Chem Biol* **2007**, *14* (8), 898-908; (b) Zheng, J.; Taylor, C. A.; Piasecki, S. K.; Keatinge-Clay, A. T., Structural and functional analysis of A-type ketoreductases from the amphotericin modular polyketide synthase. *Structure* **2010**, *18* (8), 913-22; (c) Bailey, C. B.; Paman, M. E.; Keatinge-Clay, A. T., Substrate structure-activity relationships guide rational engineering of modular polyketide synthase ketoreductases. *Chem Commun (Camb)* **2016**, *52* (4), 792-5; (d) Xie, X.; Garg, A.; Keatinge-Clay, A. T.; Khosla, C.; Cane, D. E., Epimerase and reductase activities of polyketide synthase ketoreductase domains utilize the same conserved tyrosine and serine residues. *Biochemistry* **2016**, *55* (8), 1179-86; (e) Caffrey, P., Conserved amino acid residues correlating with ketoreductase stereospecificity in modular polyketide synthases. *Chembiochem* **2003**, *4* (7), 654-7; (f) Valenzano, C. R.; Lawson, R. J.; Chen, A. Y.; Khosla, C.; Cane, D. E., The biochemical basis for stereochemical control in polyketide biosynthesis. *J Am Chem Soc* **2009**, *131* (51), 18501-11.
3. Keatinge-Clay, A. Crystal structure of the erythromycin polyketide synthase dehydratase. *J Mol Biol* **2008**, *384*(4) 941-53.
4. Kwan, D. H.; Sun, Y.; Schulz, F.; Hong, H.; Popovic, B.; Sim-Stark, J. C. C.; Haydock, S. F.; Leadlay, P., Prediction and manipulation of the stereochemistry of enoylreduction in modular polyketide synthases. *Chem Biol* **2008**, *15*(11) 1231-40.
5. Hirsch, M.; Fitzgerald, B. J.; Keatinge-Clay, A. T., How *cis*-acyltransferase assembly-line ketosynthases gatekeep for processed polyketide intermediates. *ACS Chem Biol* **2021**, *16*(11) 2515-26.
